# Supplementary material for: Copper and cobalt co-catalyzed aerobic oxidative cross-dehydrogenative coupling reaction of (benzo)azoles
Source: Royal Society of Chemistry journal article supplement (doi:10.1039/c9gc02464f), 2019-01-01

# Copper and Cobalt Co-Catalyzed Aerobic Oxidative Cross-Dehydrogenative Coupling Reaction of (Benzo)Azoles

Yanrong Li,<sup>a</sup> Fen Qian,<sup>a</sup> Xia Ge,<sup>a</sup> Tao Liu,<sup>a</sup> Hitesh B. Jalani,<sup>c,d</sup> Hongjian Lu<sup>a\*</sup> and Guigen Li<sup>a,b\*</sup>

<sup>a</sup>Institute of Chemistry and BioMedical Sciences, School of Chemistry and Chemical, Engineering, Nanjing University, Nanjing, 210093, China

<sup>b</sup>Department of Chemistry and Biochemistry, Texas Tech University, Lubbock, TX 79409-1061, USA

<sup>c</sup>Department for Management of Science and Technology Development, Ton Duc Thang University, Ho Chi Minh City, Vietnam.

<sup>d</sup>Faculty of Applied Sciences, Ton Duc Thang University, Ho Chi Minh City, Vietnam.

## Supporting Information

### Table of Contents

|                                                                                    |     |
|------------------------------------------------------------------------------------|-----|
| 1. General Information.....                                                        | S2  |
| 2. Experimental Section.....                                                       | S3  |
| 2.1 General Procedure For the Objective Product                                    |     |
| 2.2 Aerobic and Anaerobic Control Experiments                                      |     |
| 2.3 Radical Trapping Experiments                                                   |     |
| 2.4 Cobalt-Copper Cocatalyzed Self-coupling and Cross-coupling Control Experiments |     |
| 3. References.....                                                                 | S15 |
| 4. <sup>1</sup> H and <sup>13</sup> C NMR Spectra.....                             | S16 |

## 1. General Information

All the solvents and commercially available reagents were purchased from commercial sources and used directly. Thin layer chromatography (TLC) was performed on EMD precoated plates (silica gel 60 F254, Art 5715). Visualization of TLC was achieved by the use of UV light (254 nm). Column chromatography was performed on silica gel (300-400 mesh) using a forced flow of 0.5–1.0 bar.  $^1\text{H}$  NMR was recorded on FT AM 400 (400 MHz). Chemical shifts were reported in parts per million (ppm) referenced to the appropriate solvent peak or 0.0 ppm for tetramethylsilane. The following abbreviations were used to describe peak splitting patterns: br = broad, s = singlet, d = doublet, t = triplet, q = quartet, dd = doublet of doublet, td = triplet of doublet, ddd = doublet of doublet of doublet, m = multiplet. Coupling constants, J, were reported in hertz (Hz). The fully decoupled  $^{13}\text{C}$  NMR was recorded on FT AM 400 (100 MHz). Infrared (IR) spectra were recorded on a Nicolet 6700 spectrophotometer and reported as wave number ( $\text{cm}^{-1}$ ). High resolution mass spectra were obtained by using the UHD Accurate-Mass Q-TOF.

## 2. Experimental Section

### 2.1 General Procedure For the Objective Product

A 35 mL oven-dried pressure tube was charged with **1a** benzothiazole (27.0 mg, 0.2 mmol), **2a** benzo[d]oxazole (35.8 mg, 0.3 mmol), Cu(OAc)<sub>2</sub> · H<sub>2</sub>O (8 mg, 0.04 mmol), Co(NO<sub>3</sub>)<sub>2</sub> · 6H<sub>2</sub>O (11.7 mg, 0.04 mmol), CH<sub>3</sub>COONa (16.4 mg, 0.2 mmol), and 1-fluoro-2-(trifluoromethyl)benzene (0.8 mL). The tube was then sealed and stirred vigorously at 130 °C for 18 h. Then cooled to room temperature, diluted with ethyl acetate, filtered through a celite pad and concentrated under reduced pressure. The residue was purified by silica gel chromatography (dichloromethane/hexane: 1/1, v/v) to give the desired product (**benzo[d]thiazol-2-yl**)benzo[d]oxazole (**3a**, 45 mg, 73% yield). The R<sub>f</sub> values of TLC for **3a**, self-coupling products 2,2'-bibenzothiazole **4a** and 2,2'-bibenzoxazole **5a** are 0.36, 0.54 and 0.27, respectively.

#### 2-(benzo[d]thiazol-2-yl)benzo[d]oxazole (**3a**)

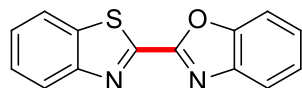

White solid, m.p.: 185-186 °C, 37 mg, yield: 73%. (known compound<sup>1</sup>) <sup>1</sup>H NMR (400 MHz, CDCl<sub>3</sub>) δ 8.28 (d, *J* = 8.1 Hz, 1H), 8.02 (d, *J* = 7.9 Hz, 1H), 7.89 (d, *J* = 7.5 Hz, 1H), 7.72 (d, *J* = 7.8 Hz, 1H), 7.65-7.53 (m, 2H), 7.49 (dd, *J* = 17.5, 8.7 Hz, 2H). <sup>13</sup>C NMR (101 MHz, CDCl<sub>3</sub>) δ 157.04, 154.45, 153.68, 151.03, 141.42, 136.86, 127.14, 127.12, 127.07, 125.50, 124.76, 121.94, 121.01, 111.43. IR (neat) ν 3015, 2969, 2942, 2853, 1738, 1465, 1446, 1318, 1216, 931, 848, 760, 669. HRMS (ESI, *m/z*): calcd. for C<sub>14</sub>H<sub>9</sub>N<sub>2</sub>OS(M+H)<sup>+</sup>: 253.0430, found: 253.0433.

#### 2-(benzo[d]thiazol-2-yl)-5-methylbenzo[d]oxazole (**3b**)

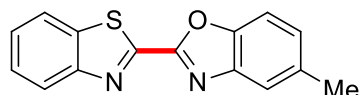

White solid, m.p.: 197-198 °C, 38 mg, yield: 71%. <sup>1</sup>H NMR (400 MHz, CDCl<sub>3</sub>) δ 8.25 (d, *J* = 8.1 Hz, 1H), 7.99 (d, *J* = 8.0 Hz, 1H), 7.65-7.54 (m, 3H), 7.51 (t, *J* = 7.5 Hz, 1H), 7.28 (s, 1H), 2.50 (s, 3H). <sup>13</sup>C NMR (101 MHz, CDCl<sub>3</sub>) δ 157.06, 154.58, 153.72, 149.41, 141.66, 135.47, 128.31, 127.05, 126.98, 124.68, 121.90, 120.71, 110.75, 21.53. IR (neat) ν 3015, 2969, 2855, 2379, 1428, 1365, 1228, 1120, 910, 807, 668. HRMS (ESI, *m/z*): calcd. for C<sub>15</sub>H<sub>10</sub>N<sub>2</sub>NaOS(M+Na)<sup>+</sup>: 289.0406, found: 289.0404.

#### 2-(benzo[d]thiazol-2-yl)-6-methylbenzo[d]oxazole (**3c**)

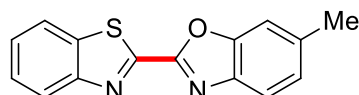

White solid, m.p.: 185-186 °C, 40 mg, yield: 75%. <sup>1</sup>H NMR (400 MHz, CDCl<sub>3</sub>) δ 8.25 (d, *J* = 8.1 Hz, 1H), 7.99 (d, *J* = 8.0 Hz, 1H), 7.65-7.54 (m, 3H), 7.51 (t, *J* = 7.5 Hz, 1H), 7.28 (s, 1H), 2.50 (s, 3H). <sup>13</sup>C NMR (101 MHz, CDCl<sub>3</sub>) δ 156.55, 154.64, 153.64, 151.32, 139.26, 137.93, 135.74,

127.06, 126.96, 126.91, 124.64, 121.89, 120.30, 111.38, 21.99. IR (neat)  $\nu$  3022, 2967, 2851, 2375, 1615, 1455, 1373, 1313, 1228, 1017, 756, 728, 699. HRMS (ESI,  $m/z$ ): calcd. for  $C_{15}H_{10}N_2NaOS(M+Na)^+$ : 289.0406, found: 289.0405.

### 2-(benzo[d]thiazol-2-yl)-5-methoxybenzo[d]oxazole (3d)

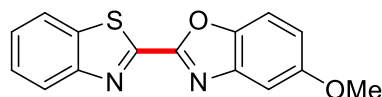

White solid, m.p.: 178-179 °C, 44 mg, yield: 78%.  $^1H$  NMR (400 MHz,  $CDCl_3$ )  $\delta$  8.25 (d,  $J = 8.1$  Hz, 1H), 8.00 (d,  $J = 7.9$  Hz, 1H), 7.59 (t,  $J = 8.7$  Hz, 2H), 7.52 (t,  $J = 7.3$  Hz, 1H), 7.31 (d,  $J = 2.3$  Hz, 1H), 7.08 (dd,  $J = 9.0, 2.4$  Hz, 1H), 3.89 (s, 3H).  $^{13}C$  NMR (101 MHz,  $CDCl_3$ )  $\delta$  158.03, 157.63, 154.46, 153.65, 145.70, 142.27, 135.77, 127.09, 127.01, 124.69, 121.90, 116.32, 111.60, 103.08, 55.95. IR (neat)  $\nu$  3079, 3004, 2922, 2951, 1484, 1426, 1275, 1150, 933, 812, 715. HRMS (ESI,  $m/z$ ): calcd. for  $C_{15}H_{10}N_2NaO_2S(M+Na)^+$ : 305.0355, found: 305.0353.

### 2-(benzo[d]thiazol-2-yl)-5-chlorobenzo[d]oxazole (3e)

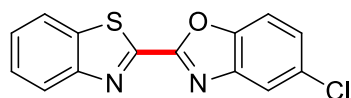

White solid, m.p.: 195-196 °C, 35 mg, yield: 62%.  $^1H$  NMR (400 MHz,  $CDCl_3$ )  $\delta$  8.27 (d,  $J = 8.1$  Hz, 1H), 8.03 (d,  $J = 7.9$  Hz, 1H), 7.85 (s, 1H), 7.62 (t,  $J = 8.4$  Hz, 2H), 7.57 (d,  $J = 7.7$  Hz, 1H), 7.46 (d,  $J = 8.7$  Hz, 1H).  $^{13}C$  NMR (101 MHz,  $CDCl_3$ )  $\delta$  158.20, 153.83, 153.59, 149.53, 142.43, 135.89, 131.10, 127.44, 127.37, 127.30, 124.87, 122.00, 120.85, 112.19. IR (neat)  $\nu$  2969, 2375, 2014, 1961, 1743, 1646, 1507, 1216, 1081, 736, 668, 591. HRMS (ESI,  $m/z$ ): calcd. for  $C_{14}H_8ClN_2OS(M+H)^+$ : 287.0040, found: 287.0041.

### 2-(benzo[d]thiazol-2-yl)-5-phenylbenzo[d]oxazole (3f)

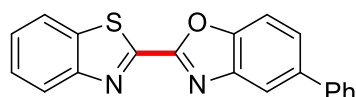

White solid, m.p.: 195-196 °C, 45 mg, yield: 69%.  $^1H$  NMR (400 MHz,  $CDCl_3$ )  $\delta$  8.29 (d,  $J = 7.9$  Hz, 1H), 8.14-7.98 (m, 2H), 7.75 (dd,  $J = 18.9, 8.1$  Hz, 2H), 7.66 (d,  $J = 7.1$  Hz, 2H), 7.62 (d,  $J = 7.8$  Hz, 1H), 7.57 (d,  $J = 7.5$  Hz, 1H), 7.51 (t,  $J = 6.9$  Hz, 2H), 7.43 (d,  $J = 6.5$  Hz, 1H).  $^{13}C$  NMR (101 MHz,  $CDCl_3$ )  $\delta$  157.59, 154.36, 153.67, 150.52, 142.04, 140.59, 139.49, 135.86, 128.97, 127.57, 127.50, 127.20, 127.18, 126.79, 124.80, 121.97, 119.28, 111.44. IR (neat)  $\nu$  3015, 2969, 2851, 2377, 1738, 1365, 1216, 1018, 816, 699, 668, 587. HRMS (ESI,  $m/z$ ): calcd. for  $C_{20}H_{12}N_2NaOS(M+Na)^+$ : 351.0563, found: 351.0561.

### 2-(benzo[d]thiazol-2-yl)-5-(tert-butyl)benzo[d]oxazole (3g)

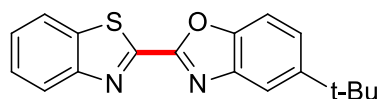

White solid, m.p.: 156-157 °C, 46 mg, yield: 74%.  $^1H$  NMR (400 MHz,  $CDCl_3$ )  $\delta$  8.26 (d,  $J = 8.1$  Hz, 1H), 8.00 (t,  $J = 8.5$  Hz, 1H), 7.90 (d,  $J = 1.4$  Hz, 1H), 7.66-7.58 (m, 2H), 7.58-7.51 (m, 2H), 1.42 (s, 9H).  $^{13}C$  NMR (101 MHz,  $CDCl_3$ )  $\delta$  157.14, 154.67, 153.67, 149.20, 149.06, 141.36,

135.80, 127.09, 127.01, 125.07, 124.69, 121.91, 117.30, 110.57, 35.06, 31.70. IR (neat)  $\nu$  2922, 2846, 2322, 1922, 1646, 1456, 1216, 1076, 668, 589, 526, 469. HRMS (ESI,  $m/z$ ): calcd. For  $C_{18}H_{16}N_2NaOS(M+Na)^+$ : 331.0876, found: 331.0877.

### 2-(5-chlorobenzo[d]thiazol-2-yl)benzo[d]oxazole (3h)

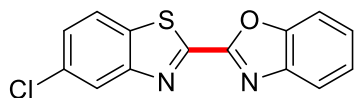

White solid, m.p.: 211-212 °C, 41 mg, yield: 72%.  $^1H$  NMR (400 MHz,  $CDCl_3$ )  $\delta$  8.20 (d,  $J = 1.3$  Hz, 1H), 7.88 (dd,  $J = 16.7, 8.1$  Hz, 2H), 7.70 (d,  $J = 7.9$  Hz, 1H), 7.54-7.40 (m, 3H).  $^{13}C$  NMR (101 MHz,  $CDCl_3$ )  $\delta$  156.58, 156.21, 154.42, 151.00, 141.31, 134.05, 133.31, 127.66, 127.31, 125.62, 124.30, 122.64, 121.09, 111.46. IR (neat)  $\nu$  3022, 2969, 2377, 1507, 1365, 1216, 910, 802, 737, 668, 517. HRMS (ESI,  $m/z$ ): calcd. For  $C_{14}H_8ClN_2OS(M+H)^+$ : 287.0040, found: 287.0037.

### 2-(6-methoxybenzo[d]thiazol-2-yl)benzo[d]oxazole (3i)

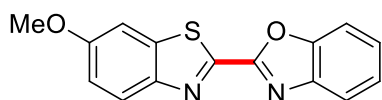

White solid, m.p.: 217-218 °C, 38 mg, yield: 67%.  $^1H$  NMR (400 MHz,  $CDCl_3$ )  $\delta$  8.25 (d,  $J = 8.1$  Hz, 1H), 7.99 (d,  $J = 8.0$  Hz, 1H), 7.65-7.54 (m, 3H), 7.51 (t,  $J = 7.5$  Hz, 1H), 7.28 (s, 1H), 2.50 (s, 3H).  $^{13}C$  NMR (101 MHz,  $CDCl_3$ )  $\delta$  159.33, 157.20, 151.67, 150.93, 148.29, 141.46, 137.65, 126.79, 125.39, 125.34, 120.81, 117.32, 111.33, 103.67, 55.89. IR (neat)  $\nu$  3015, 2969, 2944, 1738, 1434, 1365, 1228, 1216, 1091, 910, 787, 668. HRMS (ESI,  $m/z$ ): calcd. for  $C_{15}H_{11}N_2O_2S(M+H)^+$ : 283.0536, found: 283.0535.

### 5-methoxy-2-(6-methoxybenzo[d]thiazol-2-yl)benzo[d]oxazole (3j)

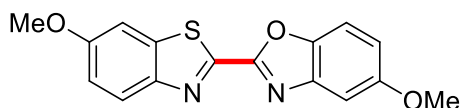

White solid, m.p.: 212-213 °C, 45 mg, yield: 72%.  $^1H$  NMR (400 MHz,  $CDCl_3$ )  $\delta$  8.12 (d,  $J = 9.0$  Hz, 1H), 7.56 (d,  $J = 9.0$  Hz, 1H), 7.42 (d,  $J = 2.3$  Hz, 1H), 7.30 (d,  $J = 2.3$  Hz, 1H), 7.19 (dd,  $J = 9.0, 2.4$  Hz, 1H), 7.06 (dd,  $J = 8.9, 2.4$  Hz, 1H), 3.93 (s, 3H), 3.90 (s, 3H).  $^{13}C$  NMR (101 MHz,  $CDCl_3$ )  $\delta$  159.25, 157.97, 157.81, 151.69, 148.29, 145.63, 142.32, 137.59, 125.27, 117.24, 115.91, 111.49, 103.66, 103.05, 55.96, 55.87. IR (neat)  $\nu$  2936, 2859, 2373, 1738, 1569, 1476, 1365, 1081, 826, 668, 527. HRMS (ESI,  $m/z$ ): calcd. for  $C_{16}H_{13}N_2O_3S^+(M+H)^+$ : 313.0641, found: 313.0640.

### 2-(6-methoxybenzo[d]thiazol-2-yl)-6-methylbenzo[d]oxazole (3k)

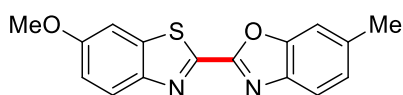

White solid, m.p.: 217-218 °C, 38 mg, yield: 63%.  $^1H$  NMR (400 MHz,  $CDCl_3$ )  $\delta$  8.14 (d,  $J = 8.8$  Hz, 1H), 7.74 (d,  $J = 8.0$  Hz, 1H), 7.48 (d,  $J = 25.5$  Hz, 2H), 7.26 (d,  $J = 8.0$  Hz, 1H), 7.20 (d,  $J = 7.0$  Hz, 1H), 3.95 (s, 3H), 2.56 (s, 3H).  $^{13}C$  NMR (101 MHz,  $CDCl_3$ )  $\delta$  159.23, 137.64, 126.78, 125.26, 120.18, 117.20, 111.40, 103.76, 55.89, 21.99. IR (neat)  $\nu$  3026, 2922, 2373, 1567, 1481,

1373, 1228, 1022, 830, 668, 518. HRMS (ESI, m/z): calcd. For  $C_{16}H_{13}N_2O_2S(M+H)^+$ : 297.0692, found: 297.0691.

### 5-(tert-butyl)-2-(5-chlorobenzo[d]thiazol-2-yl)benzo[d]oxazole (3l)

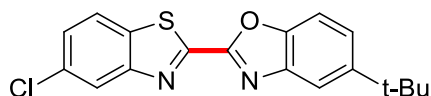

Light yellow solid, m.p.: 230-231 °C, 35 mg, yield: 51%.  $^1H$  NMR (400 MHz,  $CDCl_3$ )  $\delta$  8.23 (s, 1H), 7.95-7.89 (m, 2H), 7.64 (d,  $J = 8.7$  Hz, 1H), 7.58 (d,  $J = 8.7$  Hz, 1H), 7.51 (d,  $J = 8.6$  Hz, 1H), 1.43 (s, 9H).  $^{13}C$  NMR (101 MHz,  $CDCl_3$ )  $\delta$  156.70, 156.46, 154.46, 149.38, 149.08, 141.28, 134.02, 133.28, 127.61, 125.39, 124.27, 122.66, 117.37, 110.64, 35.09, 31.69. IR (neat)  $\nu$  2973, 2926, 2379, 1743, 1456, 1334, 1216, 1022, 830, 718, 668, 518. HRMS (ESI, m/z): calcd. For  $C_{18}H_{15}ClN_2NaOS(M+Na)^+$ : 365.0486, found: 365.0478.

### 5-(tert-butyl)-2-(6-methoxybenzo[d]thiazol-2-yl)benzo[d]oxazole (3m)

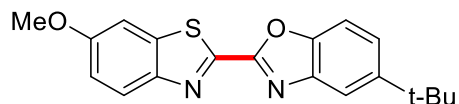

White solid, m.p.: 153-154 °C, 51 mg, yield: 75%.  $^1H$  NMR (400 MHz,  $CDCl_3$ )  $\delta$  8.10 (d,  $J = 9.0$  Hz, 1H), 7.86 (d,  $J = 1.5$  Hz, 1H), 7.59 (d,  $J = 8.7$  Hz, 1H), 7.52 (dd,  $J = 8.7, 1.8$  Hz, 1H), 7.39 (d,  $J = 2.3$  Hz, 1H), 7.16 (dd,  $J = 9.0, 2.5$  Hz, 1H), 3.90 (s, 3H), 1.40 (s, 9H).  $^{13}C$  NMR (101 MHz,  $CDCl_3$ )  $\delta$  159.19, 157.25, 151.83, 149.02, 148.96, 148.24, 141.36, 137.56, 125.23, 124.74, 117.21, 117.11, 110.45, 103.58, 55.84, 35.03, 31.70. IR (neat)  $\nu$  2944, 2865, 2824, 1508, 1456, 1260, 1091, 930, 820, 668, 610, 516. HRMS (ESI, m/z): calcd. For  $C_{19}H_{18}N_2NaO_2S(M+Na)^+$ : 361.0981, found: 361.0984.

### 2-(6-methoxybenzo[d]thiazol-2-yl)-5-methylbenzo[d]oxazole (3n)

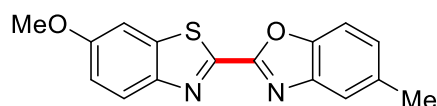

White solid, m.p.: 210-211 °C, 44 mg, yield: 73%.  $^1H$  NMR (400 MHz,  $CDCl_3$ )  $\delta$  8.11 (d,  $J = 9.0$  Hz, 1H), 7.62 (s, 1H), 7.55 (d,  $J = 8.4$  Hz, 1H), 7.41 (d,  $J = 2.3$  Hz, 1H), 7.26 (d,  $J = 8.4$  Hz, 1H), 7.18 (dd,  $J = 9.0, 2.4$  Hz, 1H), 3.92 (s, 3H), 2.51 (s, 3H).  $^{13}C$  NMR (101 MHz,  $CDCl_3$ )  $\delta$  159.23, 157.22, 151.80, 149.18, 148.26, 141.65, 137.57, 135.36, 128.02, 125.26, 120.55, 117.23, 110.65, 103.63, 55.86, 21.55. IR (neat)  $\nu$  2965, 2920, 2848, 1478, 1373, 1264, 1079, 802, 668, 592, 443. HRMS (ESI, m/z): calcd. for  $C_{16}H_{12}N_2NaO_2S(M+Na)^+$ : 319.0512, found: 319.0514.

### 5-chloro-2-(6-methoxybenzo[d]thiazol-2-yl)benzo[d]oxazole (3o)

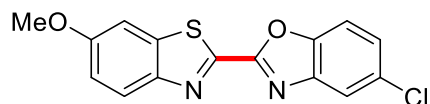

White solid, m.p.: 209-210 °C, 40 mg, yield: 62%. <sup>1</sup>H NMR (400 MHz, CDCl<sub>3</sub>) δ 8.14 (d, *J* = 9.0 Hz, 1H), 7.84 (d, *J* = 1.9 Hz, 1H), 7.62 (d, *J* = 8.7 Hz, 1H), 7.45 (dd, *J* = 6.8, 2.1 Hz, 2H), 7.22 (dd, *J* = 9.0, 2.4 Hz, 1H), 3.96 (s, 3H). <sup>13</sup>C NMR (101 MHz, CDCl<sub>3</sub>) δ 159.52, 158.40, 151.00, 149.49, 148.27, 142.54, 137.80, 130.98, 127.11, 125.48, 120.68, 117.55, 112.06, 103.63, 55.91. IR (neat) ν 3022, 2924, 2846, 2371, 1507, 1472, 1456, 1373, 1200, 1079, 875, 592. HRMS (ESI, m/z): calcd. for C<sub>15</sub>H<sub>10</sub>ClN<sub>2</sub>O<sub>2</sub>S(M+H)<sup>+</sup>: 317.0146, found: 317.0146.

### 5-(tert-butyl)-2,2'-bibenzo[d]oxazole (3p)

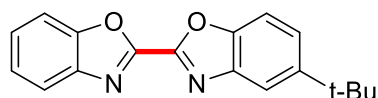

White solid, m.p.: 197-198 °C, 39 mg, yield: 66%. <sup>1</sup>H NMR (400 MHz, CDCl<sub>3</sub>) δ 7.95-7.87 (m, 2H), 7.70 (d, *J* = 7.7 Hz, 1H), 7.63-7.56 (m, 2H), 7.52-7.43 (m, 2H). <sup>13</sup>C NMR (101 MHz, CDCl<sub>3</sub>) δ 151.91, 150.96, 149.46, 149.04, 141.18, 141.15, 127.39, 125.67, 125.59, 121.43, 117.67, 111.43, 110.60, 35.06, 31.67. IR (neat) ν 2969, 2932, 2855, 2371, 1529, 1437, 1355, 1216, 1116, 668, 527. HRMS (ESI, m/z): calcd. for C<sub>18</sub>H<sub>16</sub>N<sub>2</sub>NaO<sub>2</sub>(M+Na)<sup>+</sup>: 315.1104, found: 315.1105.

### 5-(tert-butyl)-5'-methyl-2,2'-bibenzo[d]oxazole (3q)

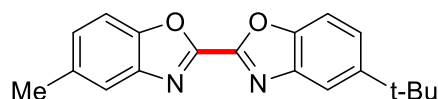

White solid, m.p.: 172-173 °C, 44 mg, yield: 71%. <sup>1</sup>H NMR (400 MHz, CDCl<sub>3</sub>) δ 7.90 (d, *J* = 1.4 Hz, 1H), 7.68 (s, 1H), 7.62 (d, *J* = 8.7 Hz, 1H), 7.60-7.56 (m, 2H), 7.31 (d, *J* = 8.4 Hz, 1H), 2.52 (s, 3H), 1.42 (s, 9H). <sup>13</sup>C NMR (101 MHz, CDCl<sub>3</sub>) δ 152.03, 149.40, 149.24, 148.99, 141.37, 141.16, 135.74, 128.71, 125.49, 121.08, 117.63, 110.78, 110.57, 35.06, 31.68, 21.54. IR (neat) ν 2969, 1738, 1364, 1228, 1216, 1102, 867, 824, 761, 672, 527. HRMS (ESI, m/z): calcd. for C<sub>19</sub>H<sub>18</sub>N<sub>2</sub>NaO<sub>2</sub>(M+Na)<sup>+</sup>: 329.1260, found: 329.1264.

### 5,6'-dimethyl-2,2'-bibenzo[d]oxazole (3r)

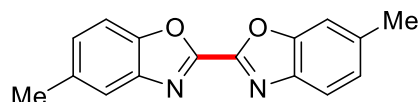

White solid, m.p.: 188-189 °C, 37 mg, yield: 69%. <sup>1</sup>H NMR (400 MHz, CDCl<sub>3</sub>) δ 7.75 (d, *J* = 7.9 Hz, 1H), 7.66 (s, 1H), 7.55 (d, *J* = 8.2 Hz, 1H), 7.47 (s, 1H), 7.30 (s, 1H), 7.25 (s, 1H), 2.53 (s, 3H), 2.50 (s, 3H). <sup>13</sup>C NMR (101 MHz, CDCl<sub>3</sub>) δ 152.01, 151.46, 151.26, 149.21, 141.36, 139.04, 138.33, 135.71, 128.65, 127.12, 121.04, 120.72, 111.35, 110.73, 21.98, 21.51. IR (neat) ν 2969, 2946, 2133, 1739, 1435, 1365, 1228, 1216, 899, 538, 527, 515. HRMS (ESI, m/z): calcd. for C<sub>16</sub>H<sub>12</sub>N<sub>2</sub>NaO<sub>2</sub>(M+Na)<sup>+</sup>: 287.0791, found: 287.0793.

### 6-methoxy-2,2'-bibenzo[d]thiazole (3s)

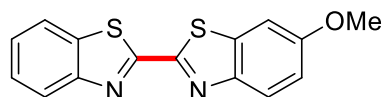

White solid, m.p.: 220-221 °C, 43 mg, yield: 71%. (known compound<sup>2</sup>) <sup>1</sup>H NMR (400 MHz, CDCl<sub>3</sub>) δ 8.16 (d, *J* = 8.2 Hz, 1H), 8.05 (d, *J* = 9.0 Hz, 1H), 7.99 (d, *J* = 7.9 Hz, 1H), 7.56 (d, *J* = 7.5 Hz, 1H), 7.49 (t, *J* = 7.6 Hz, 1H), 7.42 (d, *J* = 2.3 Hz, 1H), 7.18 (dd, *J* = 9.0, 2.4 Hz, 1H), 3.95 (s, 3H). <sup>13</sup>C NMR (101 MHz, CDCl<sub>3</sub>) δ 161.67, 158.93, 158.83, 153.55, 148.16, 137.53, 135.61, 126.74, 126.39, 124.68, 123.87, 121.98, 116.83, 103.90, 55.86. HRMS (ESI, *m/z*): calcd. IR (neat) ν 3015, 2969, 2942, 2848, 1434, 1365, 1228, 1216, 1091, 895, 754. for C<sub>20</sub>H<sub>12</sub>N<sub>2</sub>NaOS(M+H)<sup>+</sup>: 299.0307, found: 299.0306.

### 2-(5-phenyloxazol-2-yl)benzo[d]oxazole (3t)

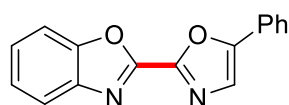

White solid, m.p.: 160-161 °C, 32 mg, yield: 60%. <sup>1</sup>H NMR (400 MHz, CDCl<sub>3</sub>) δ 7.94-7.89 (m, 1H), 7.88-7.82 (m, 2H), 7.70 (dd, *J* = 7.1, 1.7 Hz, 1H), 7.66 (s, 1H), 7.53-7.49 (m, 2H), 7.49-7.45 (m, 2H), 7.44 (dd, *J* = 5.4, 1.9 Hz, 1H). <sup>13</sup>C NMR (101 MHz, CDCl<sub>3</sub>) δ 154.05, 151.75, 150.64, 150.51, 141.22, 129.67, 129.10, 126.89, 126.74, 125.51, 125.00, 124.38, 121.13, 111.29. IR (neat) ν 3015, 2969, 1738, 1561, 1447, 1365, 1228, 909, 761, 686, 257. HRMS (ESI, *m/z*): calcd. for C<sub>16</sub>H<sub>10</sub>N<sub>2</sub>O<sub>2</sub>(M+Na)<sup>+</sup>: 285.0634, found: 285.0636.

### 5-methyl-2-(5-phenyloxazol-2-yl)benzo[d]oxazole (3u)

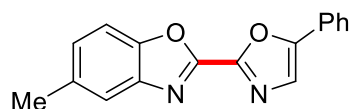

White solid, m.p.: 164-165 °C, 30 mg, yield: 53%. <sup>1</sup>H NMR (400 MHz, CDCl<sub>3</sub>) δ 7.82 (d, *J* = 7.6 Hz, 2H), 7.66 (s, 1H), 7.62 (s, 1H), 7.53 (d, *J* = 8.4 Hz, 1H), 7.47 (t, *J* = 7.5 Hz, 2H), 7.41 (d, *J* = 7.1 Hz, 1H), 7.28 (d, *J* = 2.4 Hz, 1H), 2.51 (s, 3H). <sup>13</sup>C NMR (101 MHz, CDCl<sub>3</sub>) δ 153.88, 151.77, 150.63, 148.90, 141.40, 135.48, 129.58, 129.06, 128.13, 126.75, 124.95, 124.31, 120.83, 110.61, 21.55. IR (neat) ν 2969, 2946, 2125, 1739, 1434, 1365, 1228, 1091, 899, 538, 515. HRMS (ESI, *m/z*): calcd. For C<sub>17</sub>H<sub>15</sub>N<sub>2</sub>O<sub>2</sub><sup>+</sup>(M-H)<sup>+</sup>: 277.0972, found: 277.0969.

### 5-(tert-butyl)-2-(5-phenyloxazol-2-yl)benzo[d]oxazole (3v)

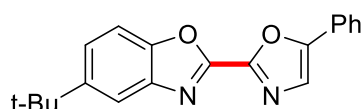

White solid, m.p.: 164-165 °C, 40 mg, yield: 62%. <sup>1</sup>H NMR (400 MHz, CDCl<sub>3</sub>) δ 7.90 (s, 1H), 7.83 (d, *J* = 7.5 Hz, 2H), 7.63 (s, 1H), 7.59 (d, *J* = 8.7 Hz, 1H), 7.53 (d, *J* = 8.7 Hz, 1H), 7.47 (t, *J* = 7.5 Hz, 2H), 7.40 (t, *J* = 7.3 Hz, 1H), 1.42 (s, 9H). <sup>13</sup>C NMR (101 MHz, CDCl<sub>3</sub>) δ 153.89, 151.81, 150.64, 149.14, 148.69, 141.18, 129.56, 129.06, 126.78, 124.93, 124.84, 124.30, 117.40,



110.39, 35.03, 31.70. IR (neat)  $\nu$  2946, 2133, 1739, 1435, 1216, 1092, 899, 792, 760, 685, 674.

HRMS (ESI, m/z): calcd. For  $C_{20}H_{18}N_2NaO_2(M+Na)^+$ : 341.1260, found: 341.1261.

$^1H$  NMR (400 MHz,  $CDCl_3$ )  $\delta$  7.90 (s, 1H), 7.83 (d,  $J = 7.5$  Hz, 2H), 7.63 (s, 1H), 7.56 (dd,  $J = 20.9$ , 8.7 Hz, 2H), 7.47 (t,  $J = 7.5$  Hz, 2H), 7.40 (t,  $J = 7.3$  Hz, 1H), 1.42 (s, 9H).

### 2-(4,5-dimethylthiazol-2-yl)benzo[d]oxazole (3w)

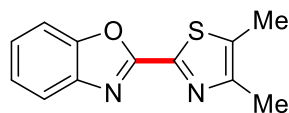

White solid, m.p.: 165-166 °C, 30 mg, yield: 64%. (known compound<sup>3</sup>)  $^1H$  NMR (400 MHz,  $CDCl_3$ )  $\delta$  7.81-7.77 (m, 1H), 7.63 (dd,  $J = 6.1, 3.0$  Hz, 1H), 7.43-7.37 (m, 2H), 2.48 (s, 6H).  $^{13}C$  NMR (101 MHz,  $CDCl_3$ )  $\delta$  157.21, 151.48, 150.59, 149.47, 141.50, 131.97, 126.10, 125.10, 120.42, 111.12, 14.91, 11.73. IR (neat)  $\nu$  3457, 3015, 2969, 1738, 1436, 1365, 1228, 1216, 1091, 895, 736, 527. HRMS (ESI, m/z): calcd. for  $C_{12}H_{10}N_2NaOS(M+Na)^+$ : 253.0406, found: 253.0405.

### 2-(4,5-dimethylthiazol-2-yl)-5-methylbenzo[d]oxazole (3x)

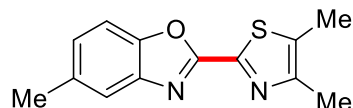

White solid, m.p.: 161-162 °C, 32 mg, yield: 65%.  $^1H$  NMR (400 MHz,  $CDCl_3$ )  $\delta$  7.55 (s, 1H), 7.48 (d,  $J = 8.4$  Hz, 1H), 7.20 (dd,  $J = 8.3, 1.0$  Hz, 1H), 2.48 (s, 3H), 2.47 (s, 6H).  $^{13}C$  NMR (101 MHz,  $CDCl_3$ )  $\delta$  157.27, 151.36, 149.62, 148.84, 141.69, 135.01, 131.71, 127.28, 120.22, 110.44, 21.50, 14.89, 11.69. IR (neat)  $\nu$  2969, 2922, 2857, 1738, 1425, 1365, 1216, 1091, 910, 806, 716, 665. HRMS (ESI, m/z): calcd. for  $C_{13}H_{12}N_2NaOS(M+Na)^+$ : 267.0563, found: 267.0565.

### 5-(tert-butyl)-2-(4,5-dimethylthiazol-2-yl)benzo[d]oxazole (3y)

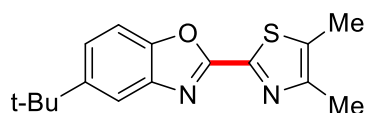

White solid, m.p.: 147-148 °C, 39 mg, yield: 67%.  $^1H$  NMR (400 MHz,  $CDCl_3$ )  $\delta$  7.80 (d,  $J = 1.5$  Hz, 1H), 7.53 (d,  $J = 8.6$  Hz, 1H), 7.46 (dd,  $J = 8.7, 1.8$  Hz, 1H), 2.47 (s, 6H), 1.39 (s, 9H).  $^{13}C$  NMR (101 MHz,  $CDCl_3$ )  $\delta$  157.30, 151.31, 149.69, 148.70, 148.61, 141.40, 131.72, 123.97, 116.80, 110.24, 34.96, 31.71, 14.91, 11.70. IR (neat)  $\nu$  2969, 2863, 1891, 1440, 1228, 1128, 1026, 911, 820, 651, 527. HRMS (ESI, m/z): calcd. for  $C_{16}H_{18}N_2NaOS(M+Na)^+$ : 309.1032, found: 309.1034.

### 2-(4,5-dimethylthiazol-2-yl)benzo[d]thiazole (3z)

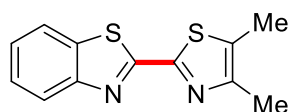

White solid, m.p.: 197-198 °C, 34 mg, yield: 68%. (known compound<sup>4,5</sup>) <sup>1</sup>H NMR (400 MHz, CDCl<sub>3</sub>) δ 8.07 (d, *J* = 8.1 Hz, 1H), 7.91 (d, *J* = 7.9 Hz, 1H), 7.52-7.48 (m, 1H), 7.44-7.38 (m, 1H), 2.45 (s, 3H), 2.43 (s, 3H). <sup>13</sup>C NMR (101 MHz, CDCl<sub>3</sub>) δ 161.84, 156.39, 153.56, 150.61, 135.12, 130.95, 126.50, 125.80, 123.40, 121.85, 14.89, 11.83. IR (neat) ν 2969, 2375, 1553, 1415, 1228, 1110, 1010, 828, 729, 685, 527. HRMS (ESI, *m/z*): calcd. for C<sub>12</sub>H<sub>11</sub>N<sub>2</sub>S<sub>2</sub>(M+H)<sup>+</sup>: 247.0358, found: 247.0359.

### 2-(4,5-dimethylthiazol-2-yl)-6-methoxybenzo[d]thiazole (3a')

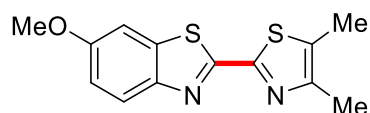

White solid, m.p.: 171-172 °C, 41 mg, yield: 74%. <sup>1</sup>H NMR (400 MHz, CDCl<sub>3</sub>) δ 7.94 (d, *J* = 9.0 Hz, 1H), 7.36 (d, *J* = 2.2 Hz, 1H), 7.10 (dd, *J* = 9.0, 2.4 Hz, 1H), 3.90 (s, 3H), 2.45 (s, 3H), 2.43 (s, 3H). <sup>13</sup>C NMR (101 MHz, CDCl<sub>3</sub>) δ 159.34, 158.28, 156.61, 150.30, 148.11, 136.68, 130.19, 123.96, 116.16, 104.02, 55.81, 14.86, 11.78. IR (neat) ν 2922, 2851, 1515, 1429, 1268, 1120, 1081, 924, 830, 806, 682, 592. HRMS (ESI, *m/z*): calcd. for C<sub>13</sub>H<sub>13</sub>N<sub>2</sub>OS<sub>2</sub>(M+H)<sup>+</sup>: 277.0464, found: 277.0464.

### 2-(6-methoxybenzo[d]thiazol-2-yl)-5-phenyloxazole (3b')

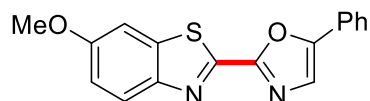

White solid, m.p.: 176-177 °C, 32 mg, yield: 51%. <sup>1</sup>H NMR (400 MHz, CDCl<sub>3</sub>) δ 8.10 (d, *J* = 9.0 Hz, 1H), 7.90-7.81 (m, 2H), 7.57 (s, 1H), 7.49 (t, *J* = 7.5 Hz, 2H), 7.45-7.37 (m, 2H), 7.18 (dd, *J* = 9.0, 2.5 Hz, 1H), 3.93 (s, 3H). <sup>13</sup>C NMR (101 MHz, CDCl<sub>3</sub>) δ 158.88, 155.84, 153.19, 151.78, 148.32, 137.03, 129.30, 129.01, 127.07, 124.90, 124.08, 116.82, 103.77, 77.38, 77.06, 76.75, 55.87. IR (neat) ν 3015, 2969, 2942, 1738, 1365, 1228, 1091, 906, 832, 684, 539, 516. HRMS (ESI, *m/z*): calcd. for C<sub>17</sub>H<sub>12</sub>N<sub>2</sub>O<sub>2</sub>S(M+Na)<sup>+</sup>: 331.0512, found: 331.0515.

### 2-(4,5-dimethylthiazol-2-yl)-5-phenyloxazole (3c')

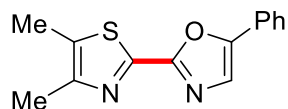

White solid, m.p.: 104-105 °C, 28 mg, yield: 54%. (known compound<sup>2</sup>) <sup>1</sup>H NMR (400 MHz, CDCl<sub>3</sub>) δ 7.84-7.73 (m, 2H), 7.46 (dd, *J* = 5.7, 4.6 Hz, 2H), 7.43 (d, *J* = 6.5 Hz, 1H), 7.41-7.32 (m, 1H), 2.46 (d, *J* = 1.3 Hz, 6H). <sup>13</sup>C NMR (101 MHz, CDCl<sub>3</sub>) δ 155.97, 152.14, 150.72, 149.81, 130.0, 128.88, 127.29, 124.9, 124.67, 123.63, 14.90, 11.58. IR (neat) ν 2969, 2924, 2853, 1588, 1448, 1423, 1365, 1228, 1204, 1036, 947, 761, 689. HRMS (ESI, *m/z*): calcd. for C<sub>14</sub>H<sub>12</sub>N<sub>2</sub>OS(M+Na)<sup>+</sup>: 279.0563, found: 279.0562.

### 2-(4-methylthiazol-2-yl)-5-phenyloxazole (3d')

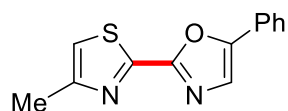

White solid, m.p.: 106-107 °C, 30 mg, yield: 61%. <sup>1</sup>H NMR (400 MHz, CDCl<sub>3</sub>) δ 7.79 (dd, *J* = 5.3, 3.4 Hz, 2H), 7.48 (s, 1H), 7.47-7.41 (m, 2H), 7.36 (m, 1H), 7.06 (d, *J* = 0.6 Hz, 1H), 2.58 (d, *J* = 0.8 Hz, 3H). <sup>13</sup>C NMR (101 MHz, CDCl<sub>3</sub>) δ 155.81, 154.95, 153.88, 152.42, 129.05, 128.92, 127.17, 124.73, 123.72, 116.30, 17.23. IR (neat) ν 2922, 2854, 1679, 1486, 1421, 1300, 1041, 909, 720, 690, 546, 502. HRMS (ESI, *m/z*): calcd. for C<sub>13</sub>H<sub>10</sub>N<sub>2</sub>OS(M+Na)<sup>+</sup>: 265.0406, found: 265.0407.

## 2.2 Aerobic and Anaerobic Control Experiments

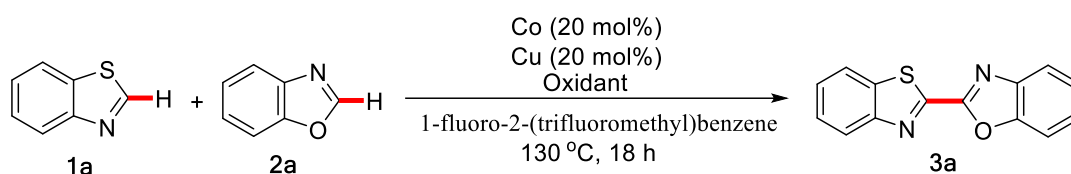

| Entry           | Co source<br>(20 mol %)                              | Cu source<br>(20 mol %)                | Oxidant        | Additives                            | <sup>c</sup> Yield [%]                     |
|-----------------|------------------------------------------------------|----------------------------------------|----------------|--------------------------------------|--------------------------------------------|
| 26 <sup>a</sup> | Co(NO <sub>3</sub> ) <sub>2</sub> ·6H <sub>2</sub> O | Cu(OAc) <sub>2</sub> ·H <sub>2</sub> O | O <sub>2</sub> | CH <sub>3</sub> COONa<br>(1.0 equiv) | 56<br>(22 <sup>d</sup> , 12 <sup>e</sup> ) |
| 27 <sup>b</sup> | Co(NO <sub>3</sub> ) <sub>2</sub> ·6H <sub>2</sub> O | Cu(OAc) <sub>2</sub> ·H <sub>2</sub> O | Ar             | CH <sub>3</sub> COONa<br>(1.0 equiv) | 8<br>(10 <sup>d</sup> , 6 <sup>e</sup> )   |

**Table S1. Aerobic and Anaerobic Control Experiments**

<sup>a</sup>Reaction conditions: **1a** (0.2 mmol), **2a** (0.3 mmol), [Co] (0.04 mmol), [Cu] (0.04 mmol), 1-fluoro-2-(trifluoromethyl)benzene (0.8 mL), O<sub>2</sub>, 130 °C, 18 h. <sup>b</sup>Reaction conditions: **1a** (0.2 mmol), **2a** (0.3 mmol), [Co] (0.04 mmol), [Cu] (0.04 mmol), 1-fluoro-2-(trifluoromethyl)benzene (0.8 mL), Ar, 130 °C, 18 h. <sup>c</sup>Crude <sup>1</sup>H NMR yields of desired product **3a** determined by using dibromomethane as an internal standard. <sup>d</sup>Crude <sup>1</sup>H NMR yields of self-coupling product **4a** 2,2'-bibenzothiazole determined by using dibromomethane as an internal standard. <sup>e</sup>Crude <sup>1</sup>H NMR yields of self-coupling product **5a** 2,2'-bibenzoxazole determined by using dibromomethane as an internal standard and based on **1a**.

## 2.3 Radical Trapping Experiment

A 35 mL oven-dried pressure tube was charged with **1a** benzothiazole (27.0 mg, 0.2 mmol), **2a** benzo[d]oxazole (35.8 mg, 0.3 mmol), Cu(OAc)<sub>2</sub>·H<sub>2</sub>O (8 mg, 0.04 mmol), Co(NO<sub>3</sub>)<sub>2</sub>·6H<sub>2</sub>O (11.7 mg, 0.04 mmol), CH<sub>3</sub>COONa (16.4 mg, 0.2 mmol), TEMPO (1.0 equiv./ 2.0 equiv./ 3.0 equiv.) and 1-fluoro-2-(trifluoromethyl)benzene (0.8 mL). The tube was sealed and stirred vigorously at 130 °C for 18 h. The reaction mixture was then cooled to room temperature, diluted with EtOAc,

filtered through a celite pad and concentrated under reduced pressure. The crude product was analyzed by  $^1\text{H}$  NMR in  $\text{CDCl}_3$  using dibromomethane as internal standard.

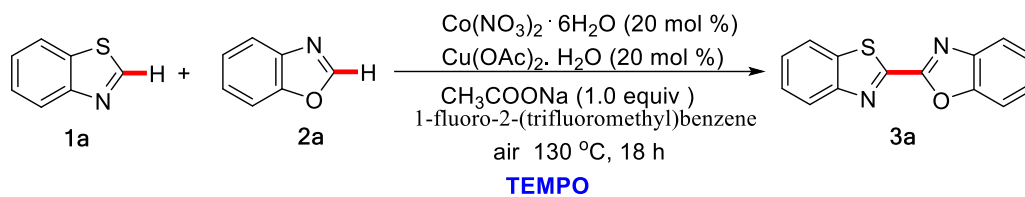

|        |                   | product |
|--------|-------------------|---------|
| entry1 | No TEMPO          | 76%     |
| entry2 | TEMPO (1.0 equiv) | 68%     |
| entry3 | TEMPO (2.0 equiv) | 64%     |
| entry4 | TEMPO (3.0 equiv) | 65%     |

**Scheme S1. Radical Trapping Experiment**

## 2.4 Cobalt-Copper Cocatalyzed Self-coupling and Cross-coupling Control Experiments

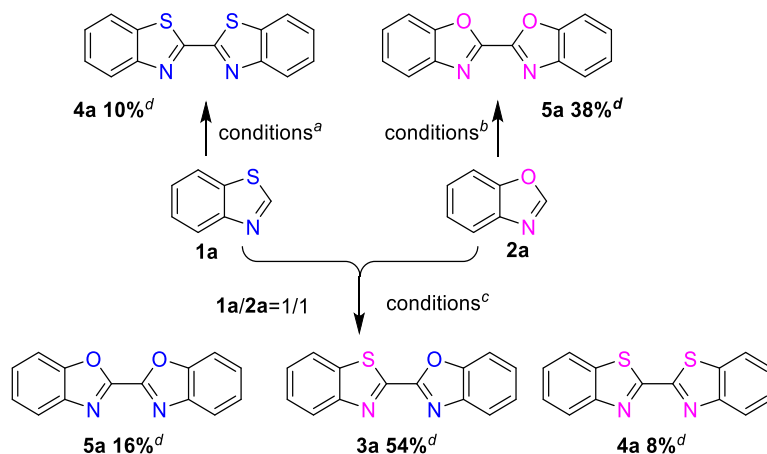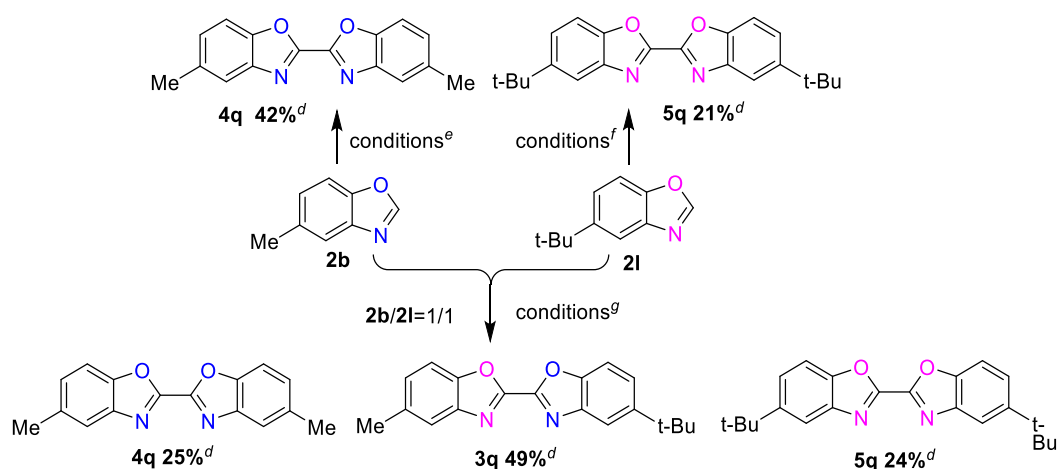

## Scheme S2. Cobalt-Copper Cocatalyzed Self-coupling and Cross-coupling Control

### Experiments

<sup>a</sup> Reaction Conditions: **1a** (0.4 mmol), Cu(OAc)<sub>2</sub> • H<sub>2</sub>O (8 mg, 0.04 mmol), Co(NO<sub>3</sub>)<sub>2</sub> • 6H<sub>2</sub>O (11.7 mg, 0.04 mmol), CH<sub>3</sub>COONa (16.4 mg, 0.2 mmol), 1-fluoro-2-(trifluoromethyl)benzene (0.8 mL), air, 130 °C, 18 h. <sup>b</sup> Reaction Conditions: **2a** (0.4 mmol), Cu(OAc)<sub>2</sub> • H<sub>2</sub>O (8 mg, 0.04 mmol), Co(NO<sub>3</sub>)<sub>2</sub> • 6H<sub>2</sub>O (11.7 mg, 0.04 mmol), CH<sub>3</sub>COONa (16.4 mg, 0.2 mmol), 1-fluoro-2-(trifluoromethyl)benzene (0.8 mL), air, 130 °C, 18 h. <sup>c</sup> Reaction conditions: **1a** (0.2 mmol), **2a** (0.2 mmol), Cu(OAc)<sub>2</sub> • H<sub>2</sub>O (8 mg, 0.04 mmol), Co(NO<sub>3</sub>)<sub>2</sub> • 6H<sub>2</sub>O (11.7 mg, 0.04 mmol), CH<sub>3</sub>COONa (16.4 mg, 0.2 mmol), 1-fluoro-2-(trifluoromethyl)benzene (0.8 mL), air, 130 °C, 18 h. <sup>d</sup> Crude <sup>1</sup>H NMR yields determined by using dibromomethane as an internal standard. <sup>e</sup> Reaction Conditions: **2b** (0.4 mmol), Cu(OAc)<sub>2</sub> • H<sub>2</sub>O (8 mg, 0.04 mmol), Co(NO<sub>3</sub>)<sub>2</sub> • 6H<sub>2</sub>O (11.7 mg, 0.04 mmol), CH<sub>3</sub>COONa (16.4 mg, 0.2 mmol), 1-fluoro-2-(trifluoromethyl)benzene (0.8 mL), air, 130 °C, 18 h. <sup>f</sup> Reaction Conditions: **2l** (0.4 mmol), Cu(OAc)<sub>2</sub> • H<sub>2</sub>O (8 mg, 0.04 mmol), Co(NO<sub>3</sub>)<sub>2</sub> • 6H<sub>2</sub>O (11.7 mg, 0.04 mmol), CH<sub>3</sub>COONa (16.4 mg, 0.2 mmol), 1-fluoro-2-(trifluoromethyl)benzene (0.8 mL), air, 130 °C, 18 h. <sup>g</sup> Reaction conditions: **2b** (0.2 mmol), **2l** (0.2 mmol), Cu(OAc)<sub>2</sub> • H<sub>2</sub>O (8 mg, 0.04 mmol), Co(NO<sub>3</sub>)<sub>2</sub> • 6H<sub>2</sub>O (11.7 mg, 0.04 mmol), CH<sub>3</sub>COONa (16.4 mg, 0.2 mmol), 1-fluoro-2-(trifluoromethyl)benzene (0.8 mL), air, 130 °C, 18 h.

When the two reactants **1a** and **2a** were added in a ratio of 1/1, the cross-coupling product **3a**

was achieved with the yield of 54%, and the yields of the self-coupling product were 8% and 16%, respectively (GC-MS data can also initially show that the cross-coupling product **3a** is the major product). When only one of the reactants **1a** or **2a** was added, self-coupling product was obtained with yields of 10% and 38%, respectively. It is shown that this reaction tends to inhibit the self-coupling reaction and preferentially generates a cross-coupling product under these Co-Cu co-catalyzed conditions. However, when **2b** 5-Me benzoxazole and **2l** 5-t-Bu benzoxazole were added in a ratio of 1/1, there were no cross-coupling reaction selectivity, suggesting that the cross-coupling selectivity of the reaction involved the difference in the substrates.

|   | Retention time | I.Time | F.Time | Peak area | Peak area% | Peak height | Peak Peak% | area/Heigh |
|---|----------------|--------|--------|-----------|------------|-------------|------------|------------|
| 1 | 10.987         | 10.955 | 11.140 | 24203985  | 18.97      | 9176772     | 19.90      | 2.64       |
| 2 | 11.940         | 11.895 | 12.430 | 90082909  | 70.59      | 31511773    | 68.35      | 2.86       |
| 3 | 12.888         | 12.805 | 13.000 | 13325183  | 10.44      | 5416247     | 11.75      | 2.46       |
|   |                |        |        | 127612077 | 100.00     | 46104792    | 100.00     |            |

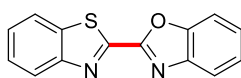

**3a**

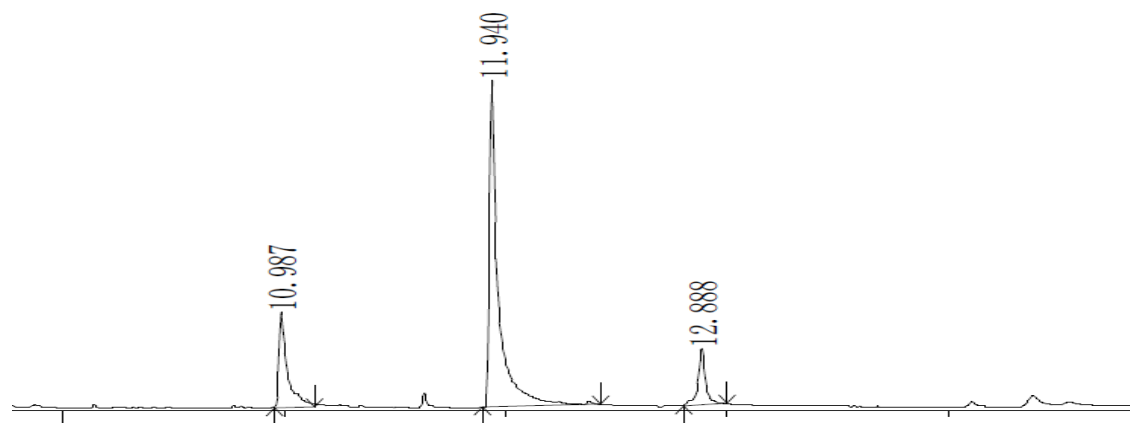

|   | Retention time | I. Time | F. Time | Peak area | Peak area% | Peak height | Peak Peak% | Area/Height |
|---|----------------|---------|---------|-----------|------------|-------------|------------|-------------|
| 1 | 12.133         | 12.110  | 12.280  | 56304644  | 26.88      | 25882989    | 28.38      | 2.18 MI     |
| 2 | 13.217         | 13.165  | 13.405  | 99348177  | 47.44      | 41458108    | 45.46      | 2.40 MI     |
| 3 | 14.592         | 14.550  | 14.690  | 53782223  | 25.68      | 23851578    | 26.16      | 2.25 MI     |
|   |                |         |         | 209435044 | 100.00     | 91192675    | 100.00     |             |

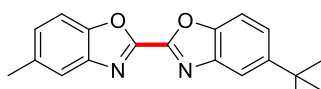

**3q**

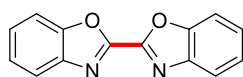

**5a**

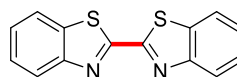

**4a**

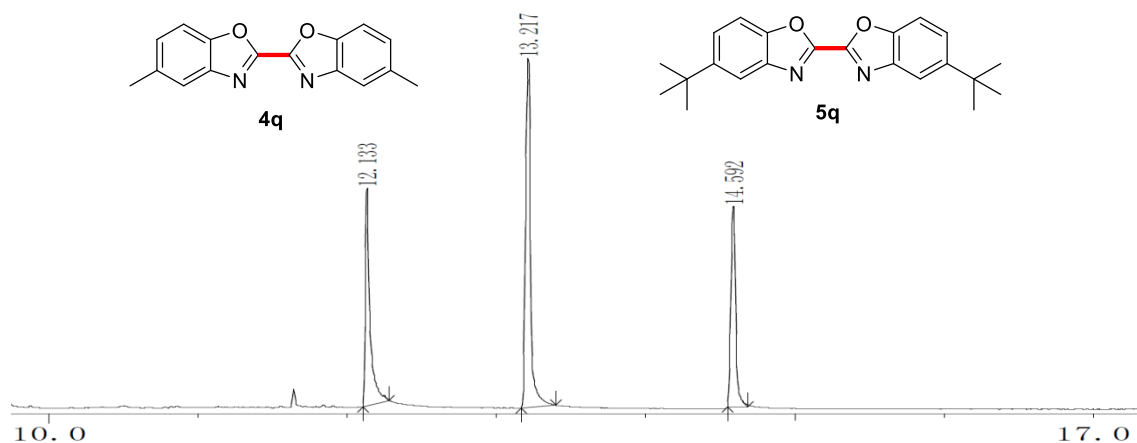

### 3. References and Notes

- (1) Derridj, F.; Roger, J.; Geneste, F.; Djebbar, S.; Doucet, H. *J. Organomet. Chem.* **2009**, 455.
- (2) Li, Y.; Qian, F.; Wang, M.; Lu, H.; Li, G. *Org. Lett.*, **2017**, 19, 5589.
- (3) Dong, J.; Huang, Y.; Qin, X.; Cheng, Y.; Hao, J.; Wan, D.; Li, W.; Liu, X.; You, J. *Chem. Eur. J.* **2012**, 18, 6158.
- (4) Han, W.; Mayer, Peter.; Ofial, A. R. *Angew. Chem., Int. Ed.* **2011**, 50, 2178 .
- (5) Fan, S.; Chen, Z.; Zhang, X. *Org. Lett.* **2012**, 14, 4950.

## 4. $^1\text{H}$ and $^{13}\text{C}$ NMR Spectra

3a



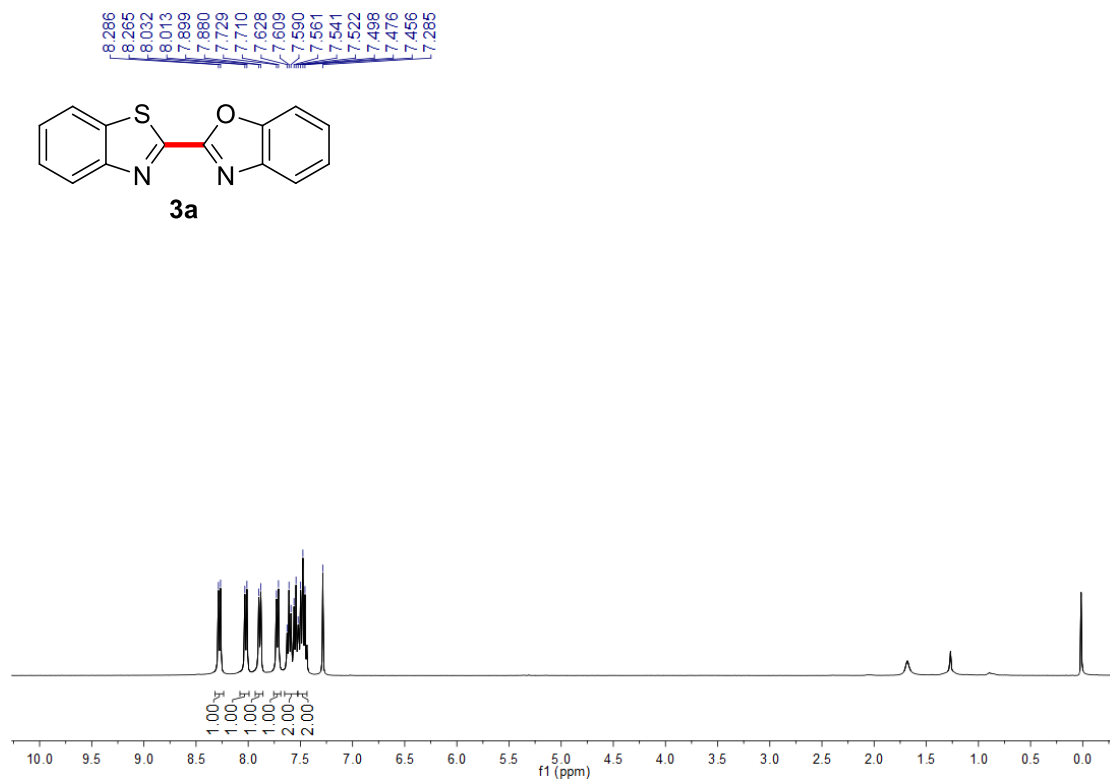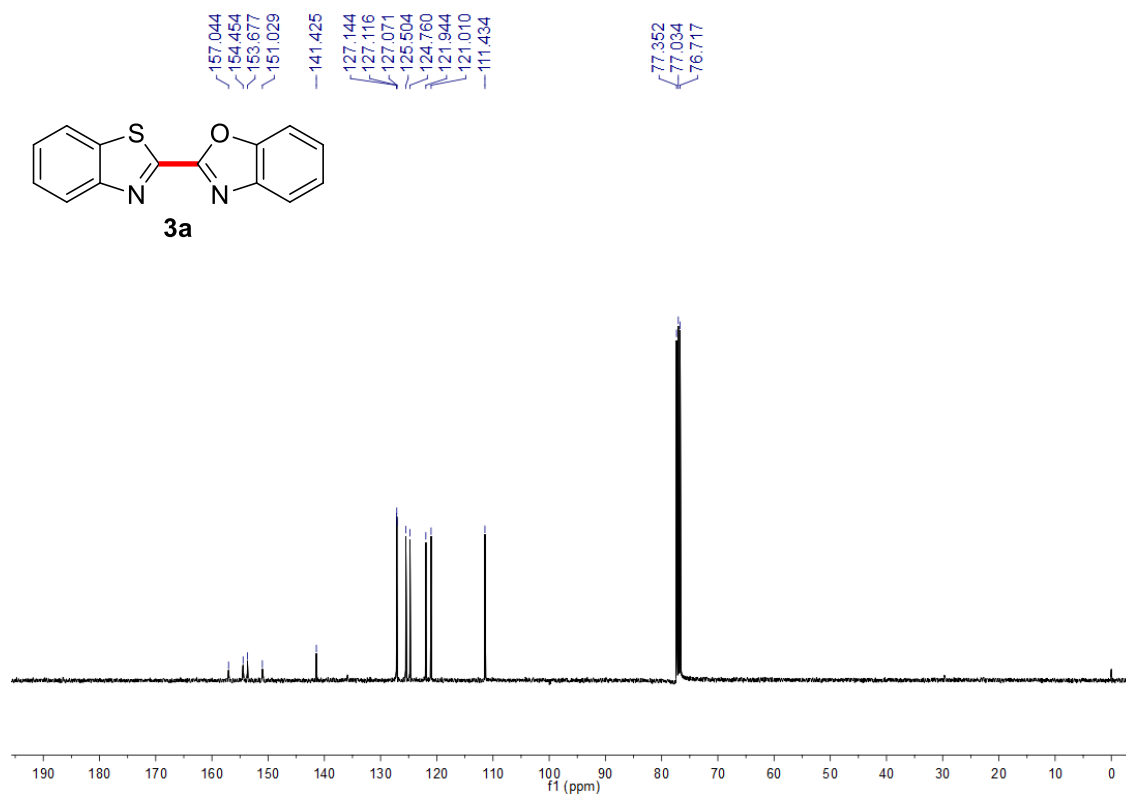

3b

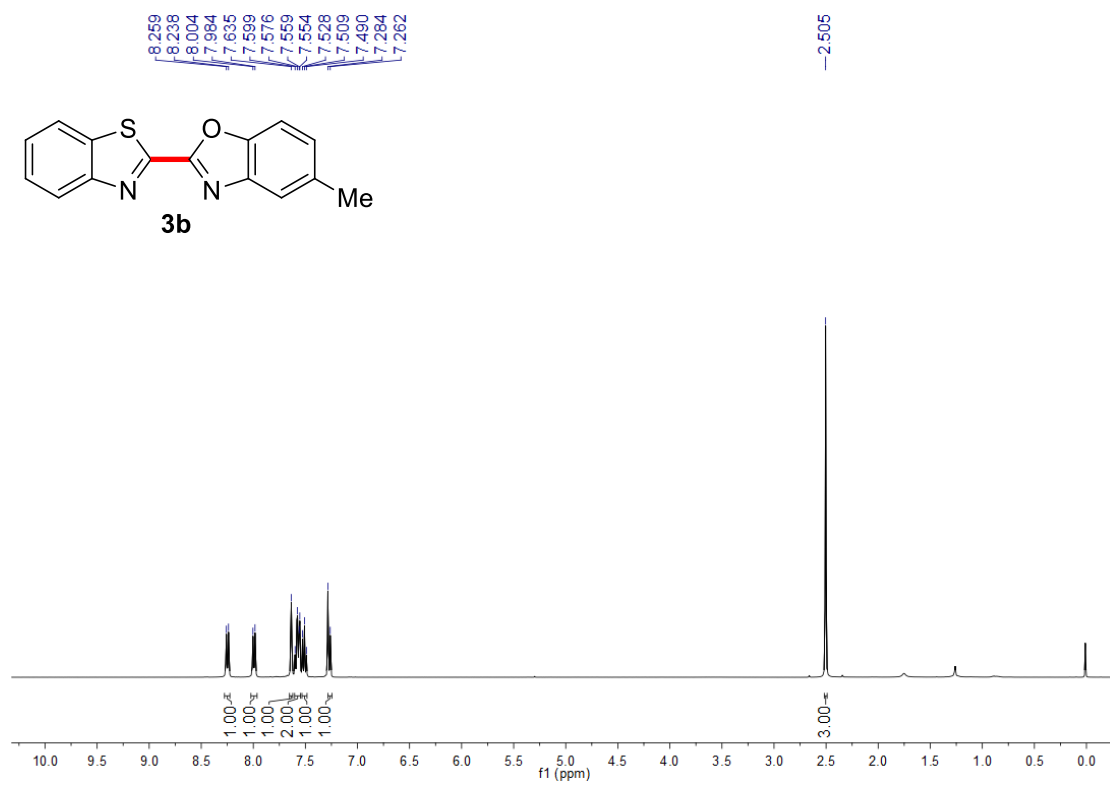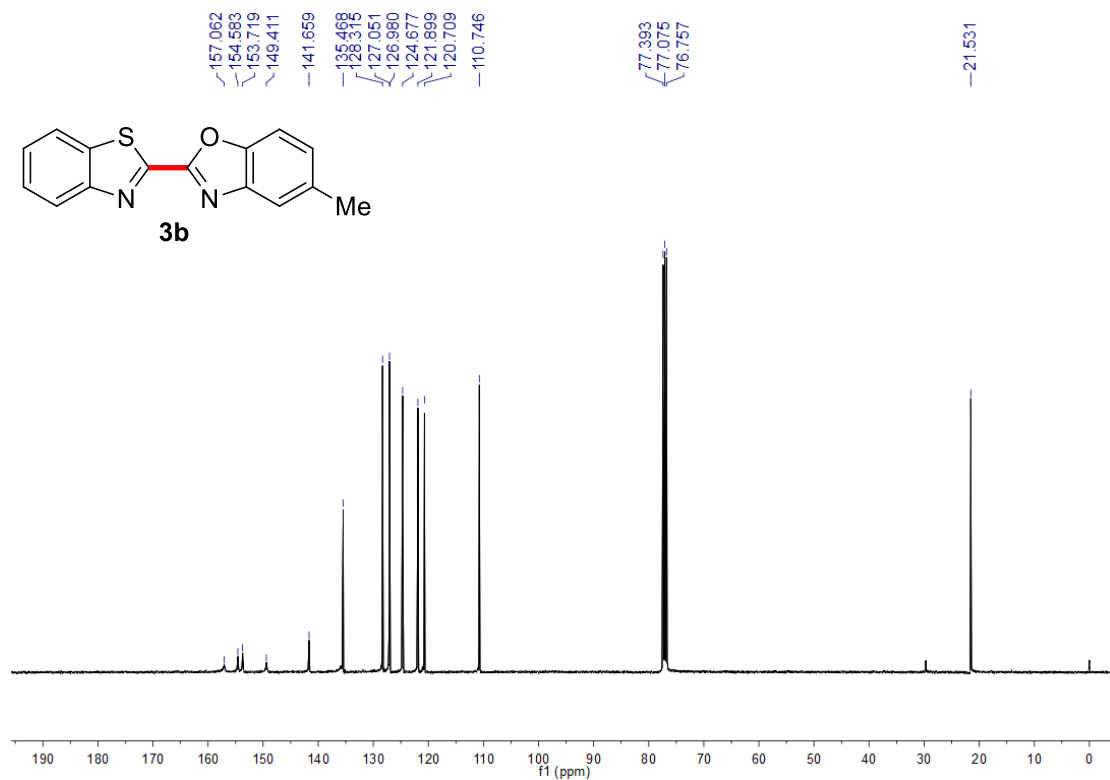

3c

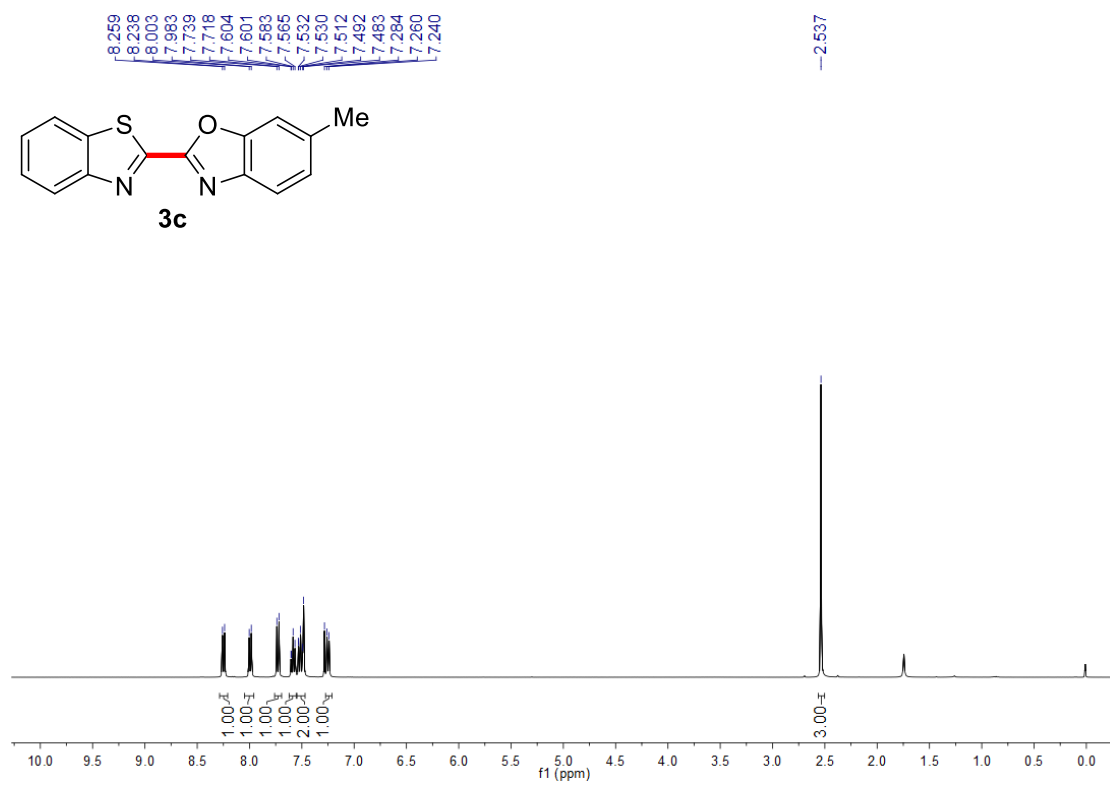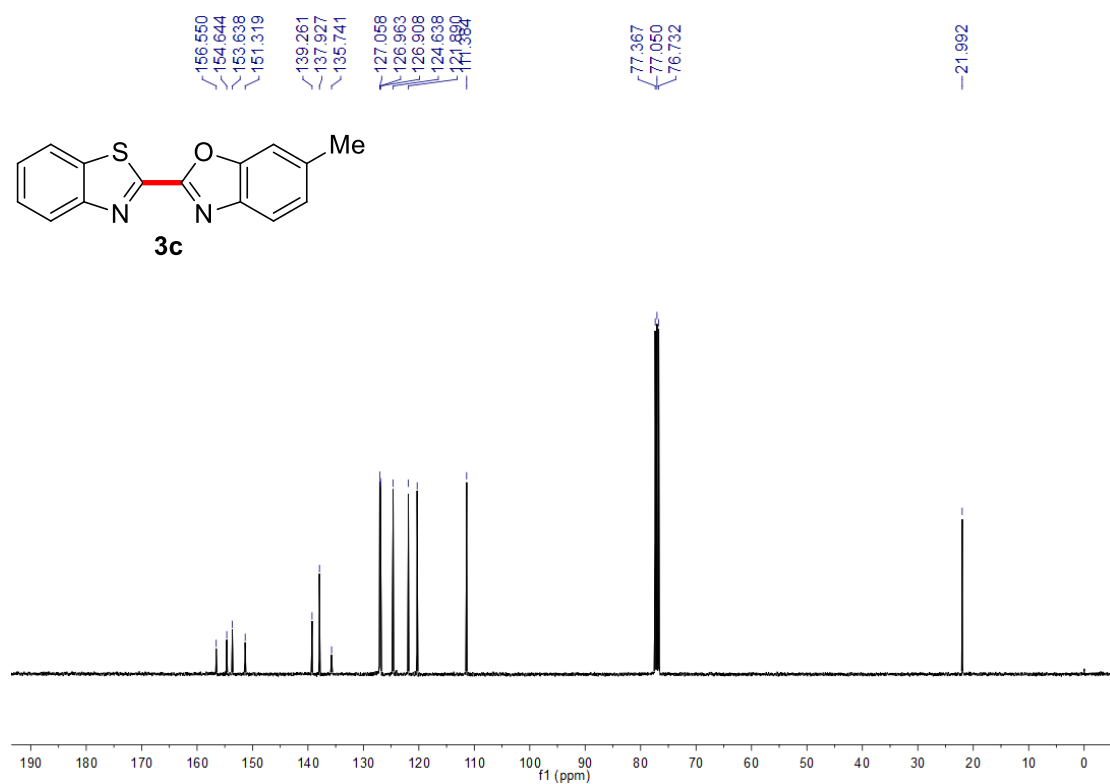

3d

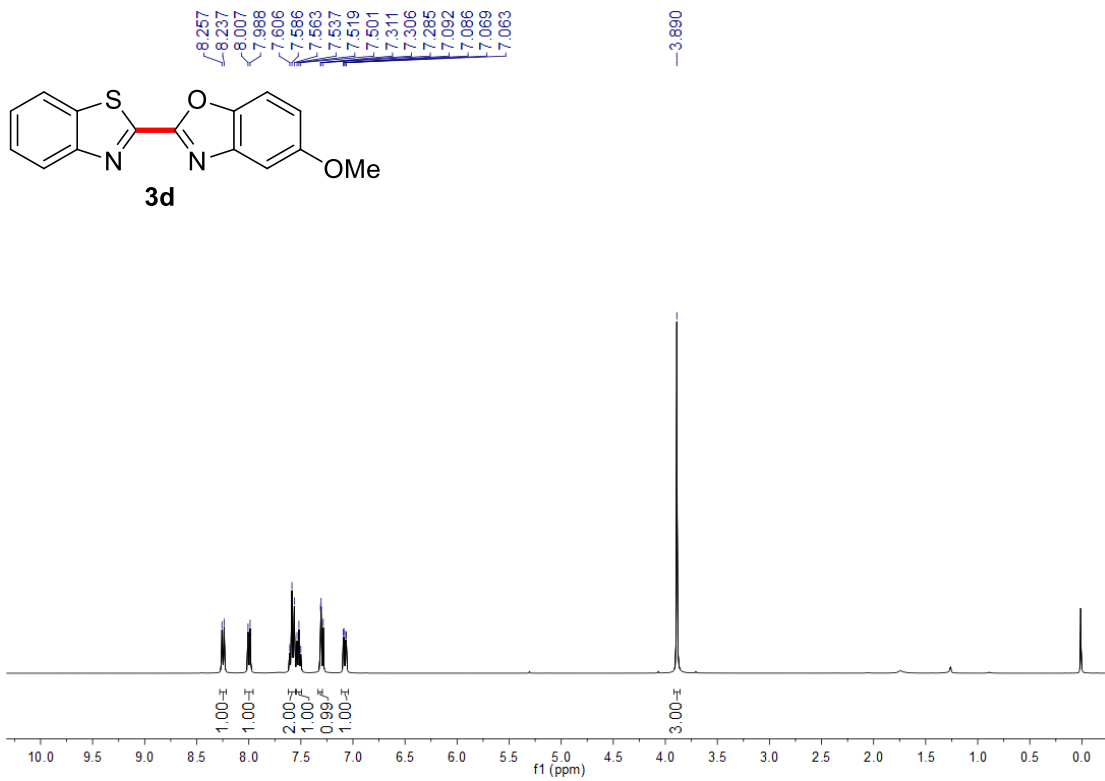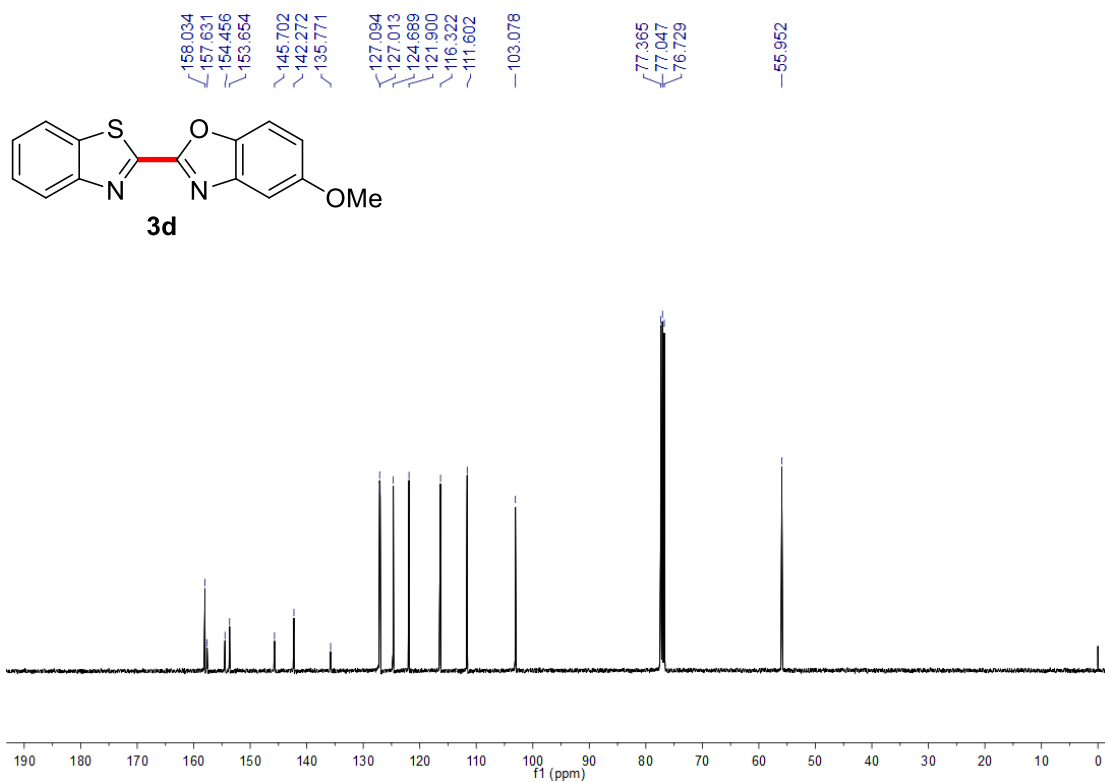

3e

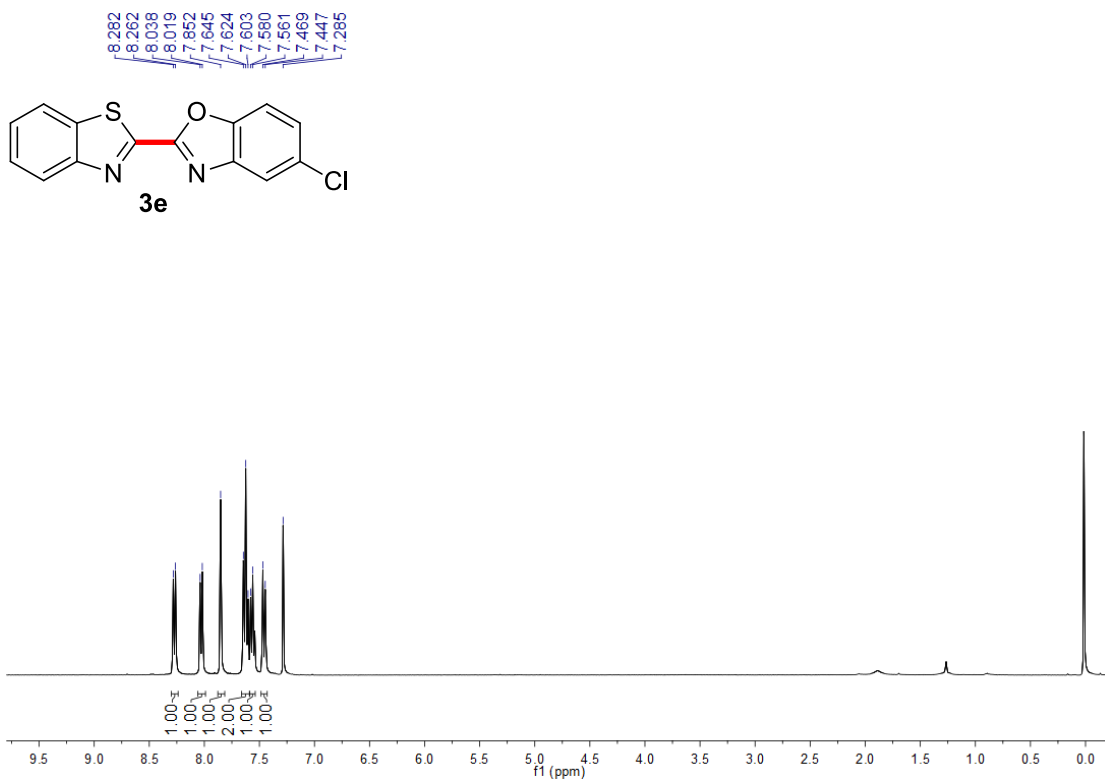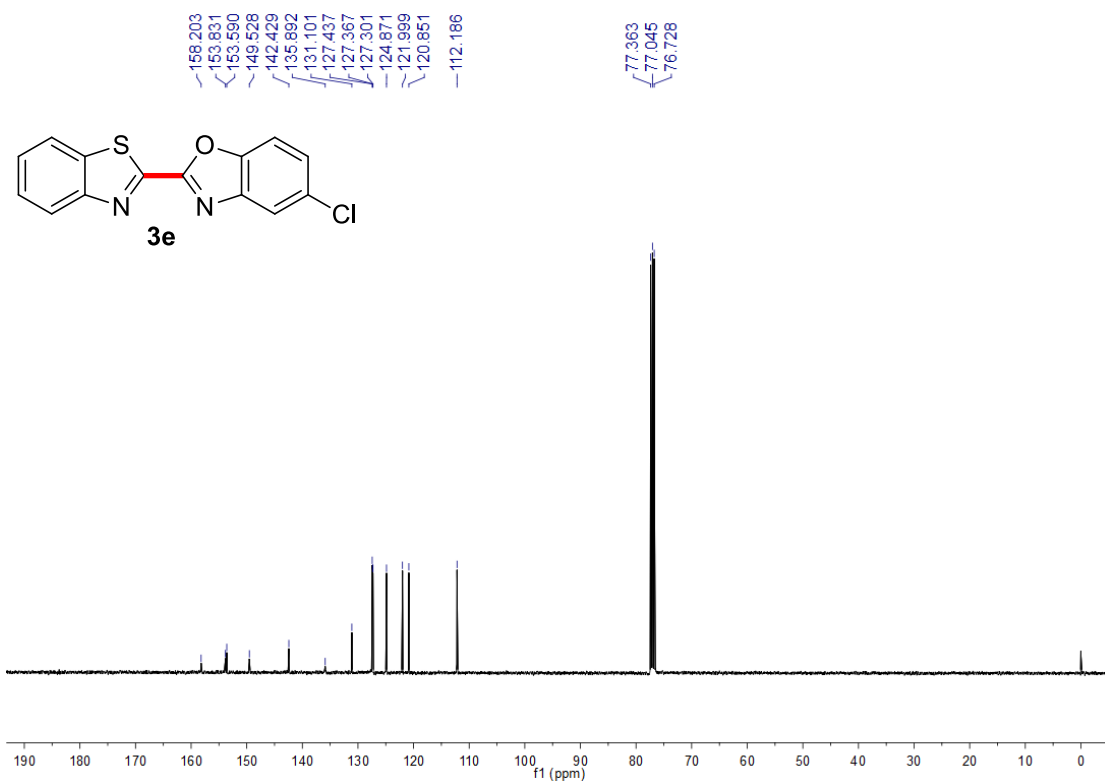

3f

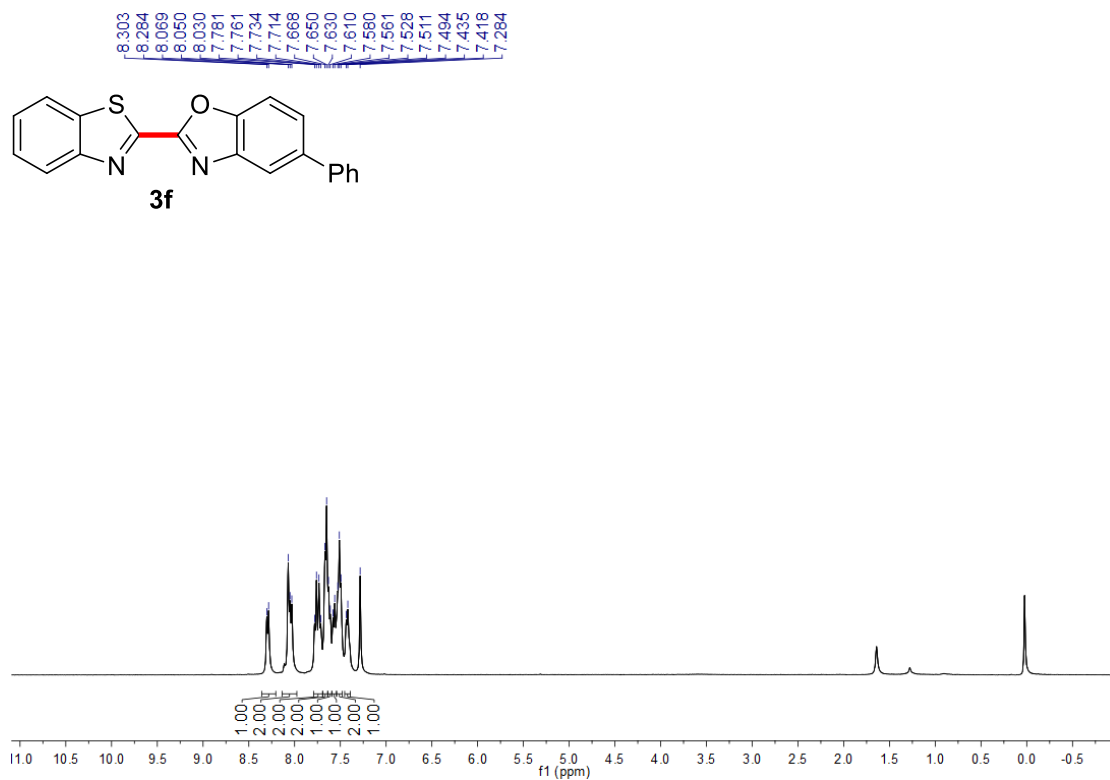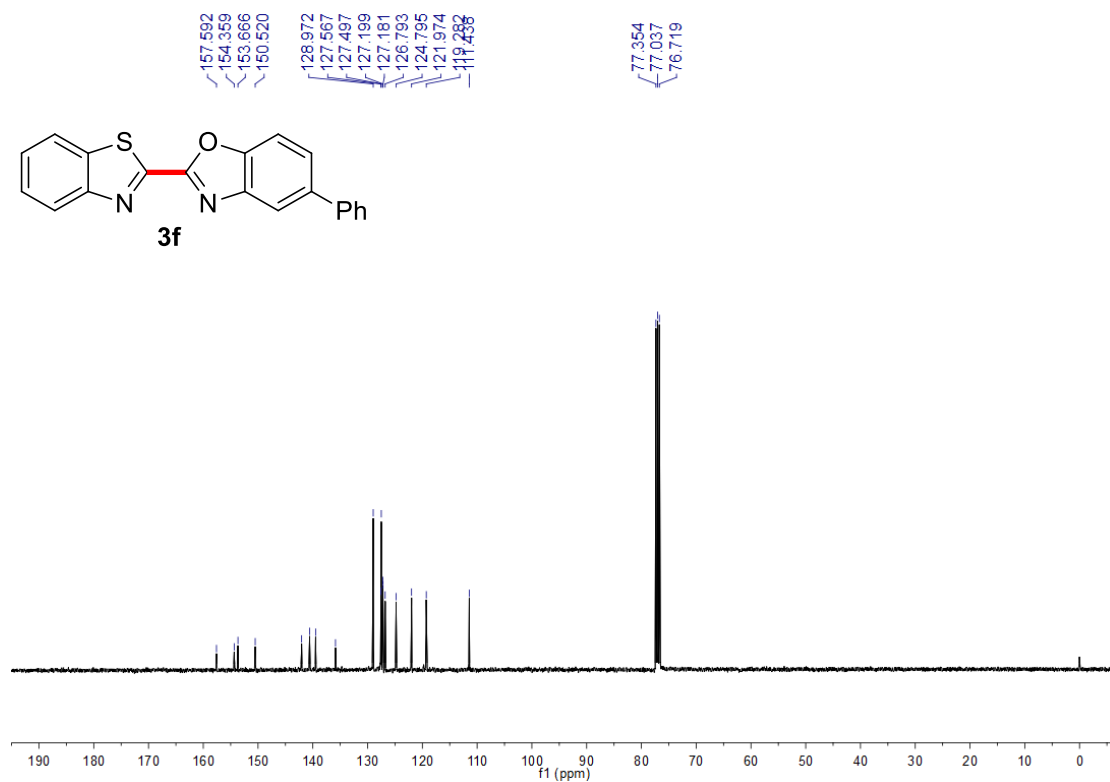

3g

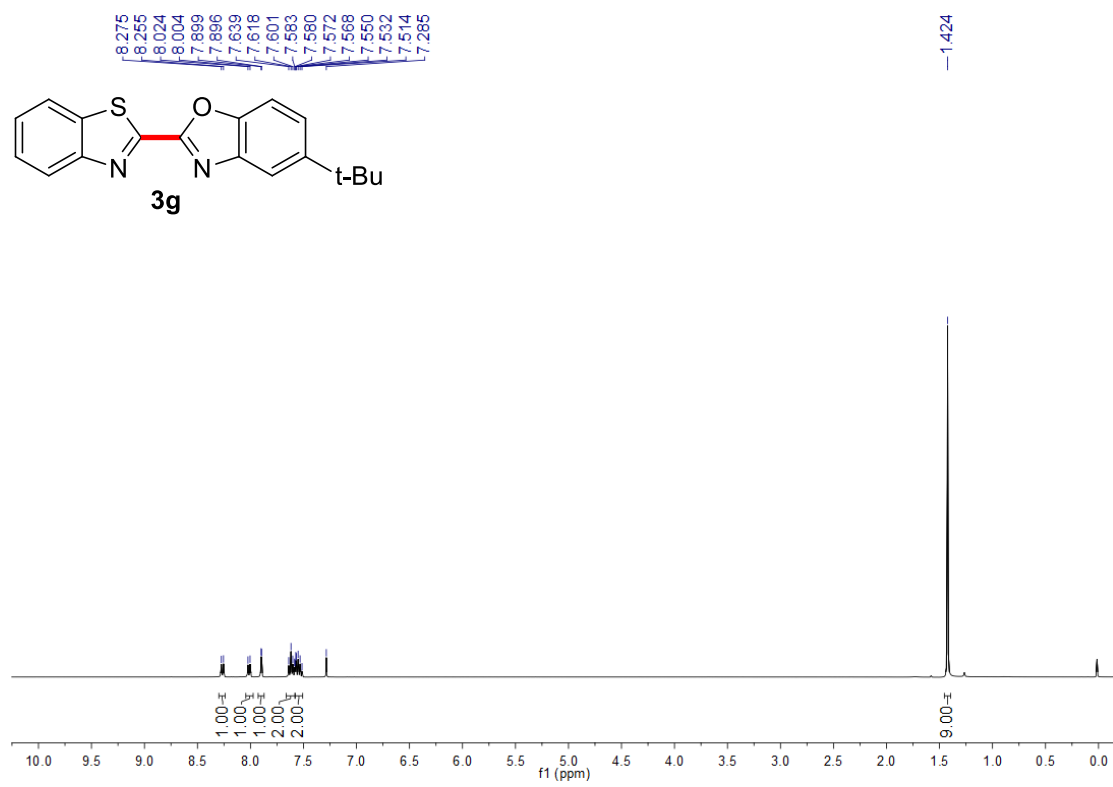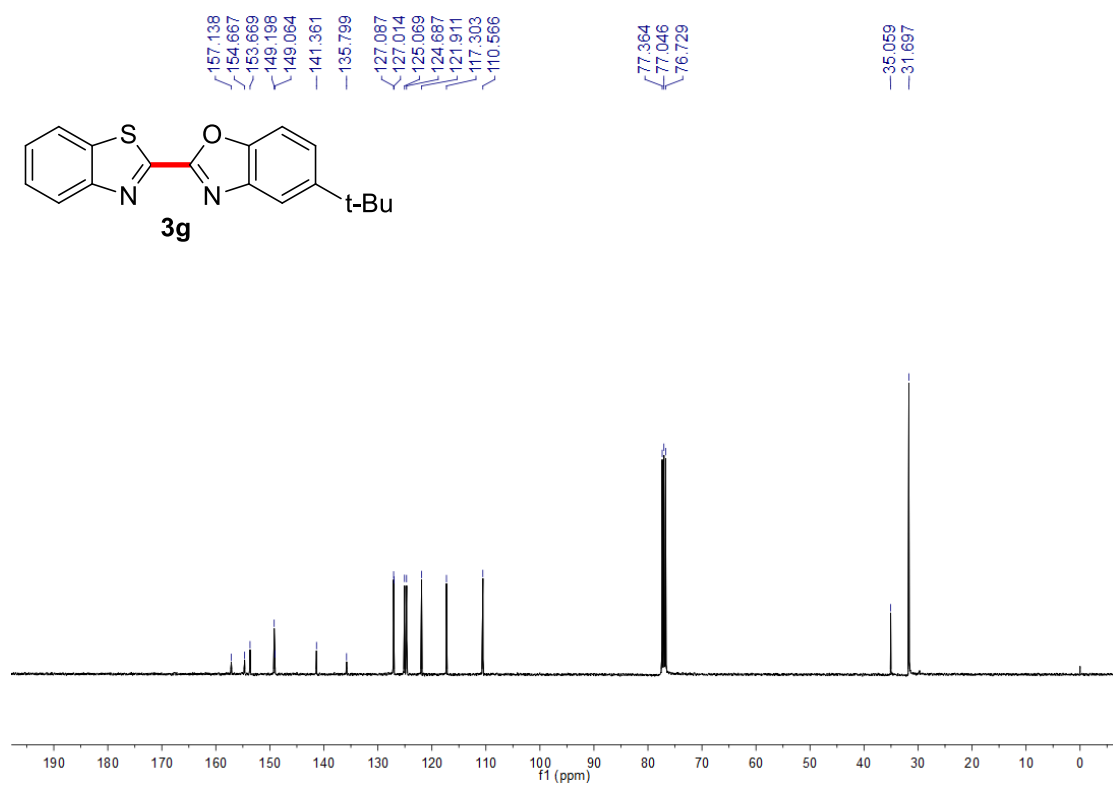

**3h**

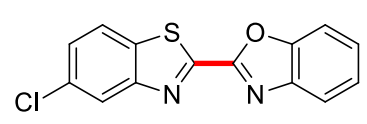

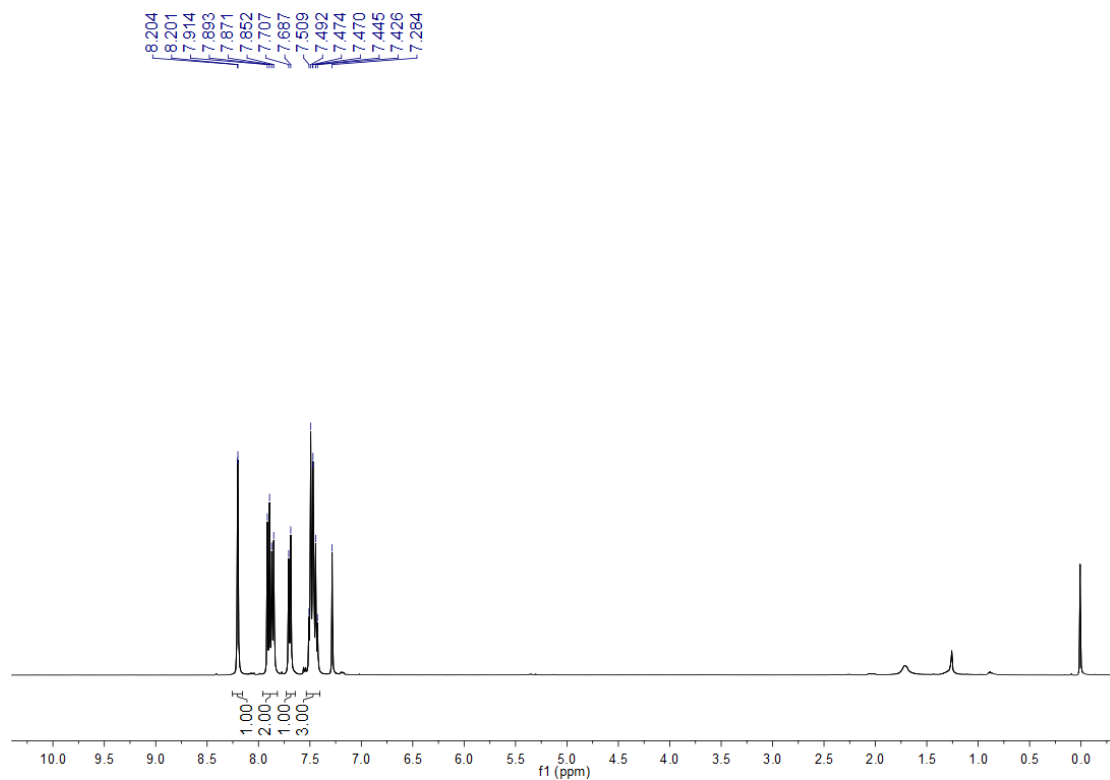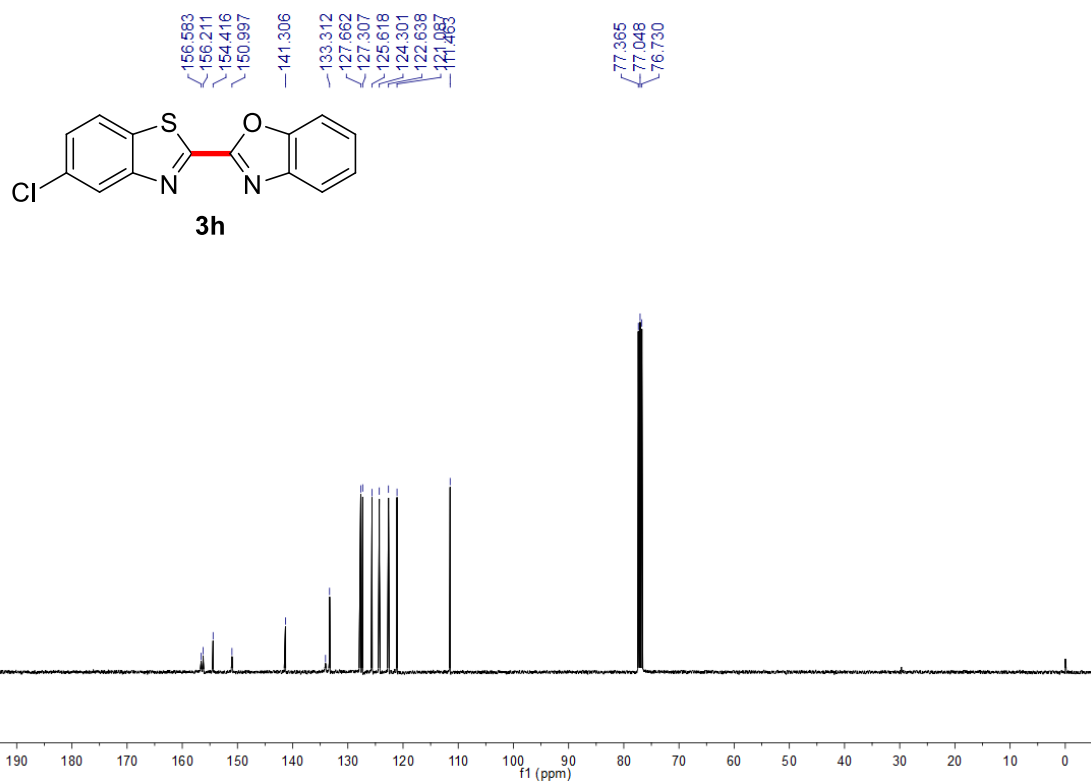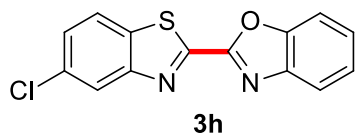

3i

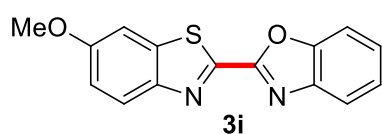

S24



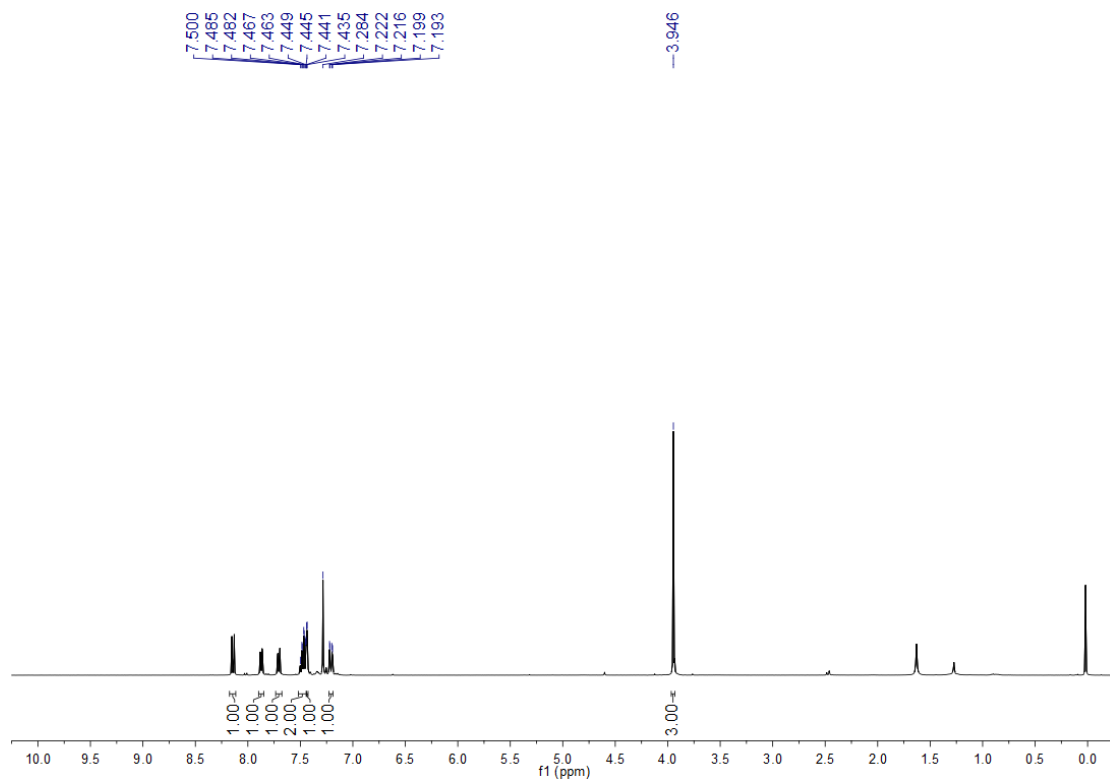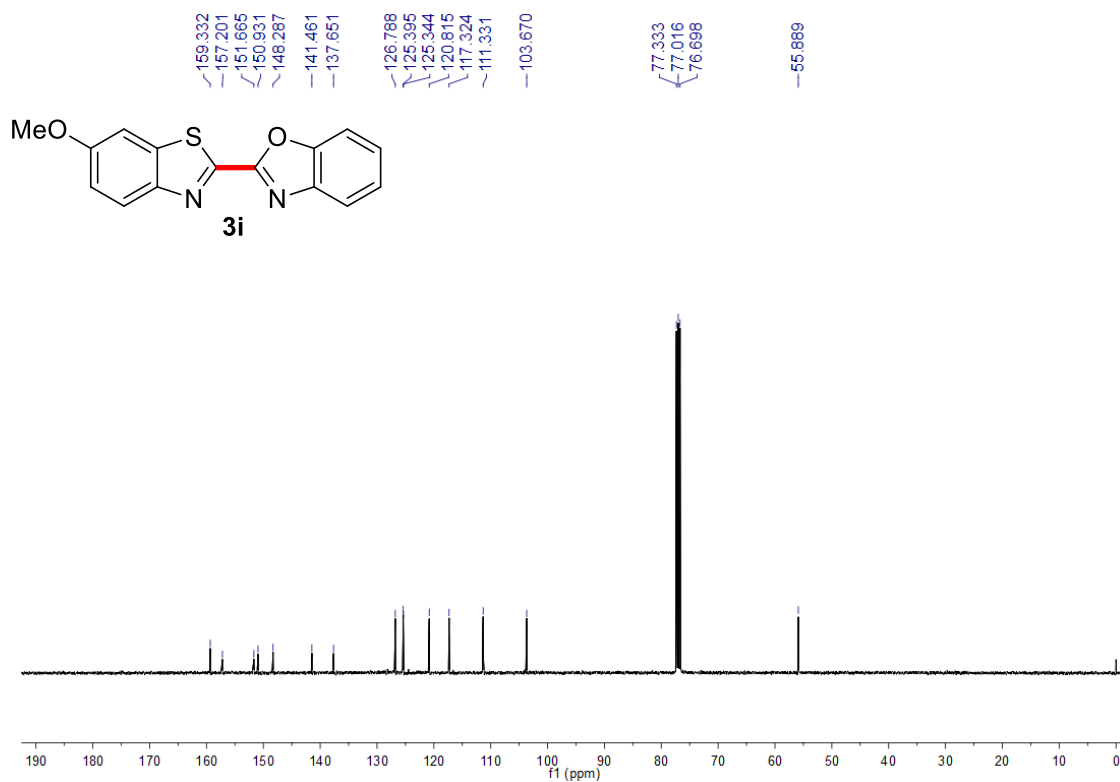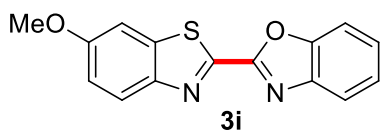

3j

S25

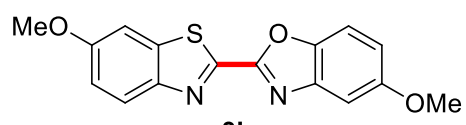

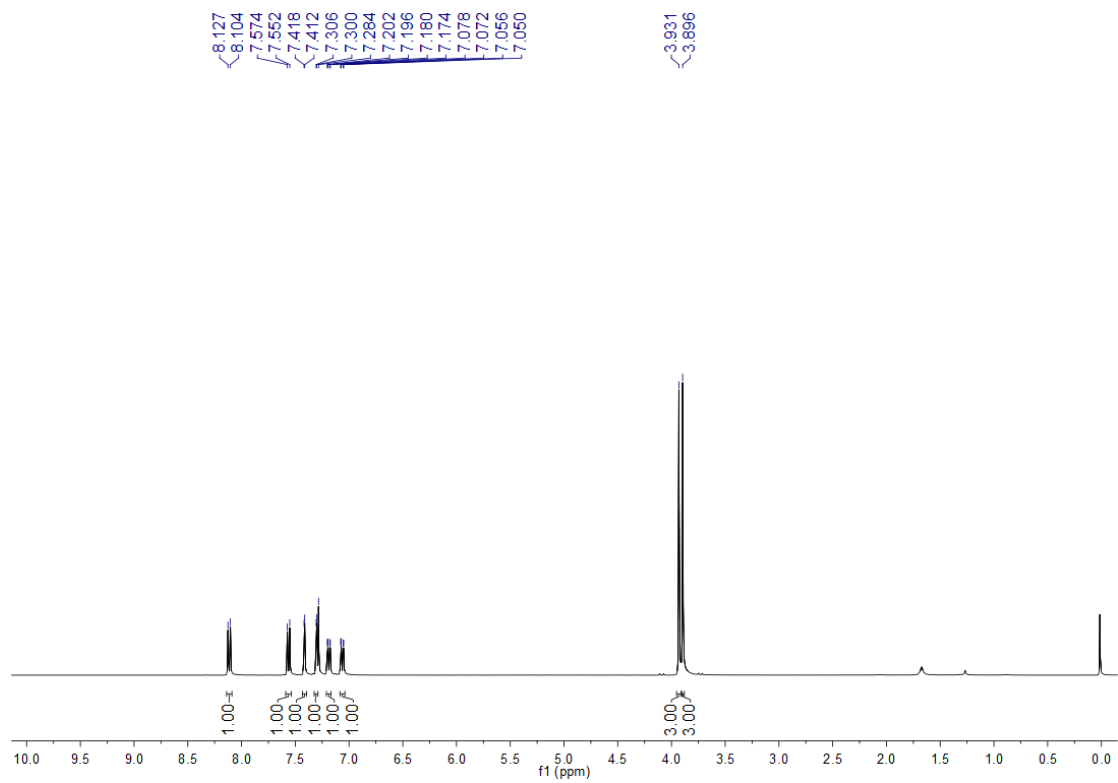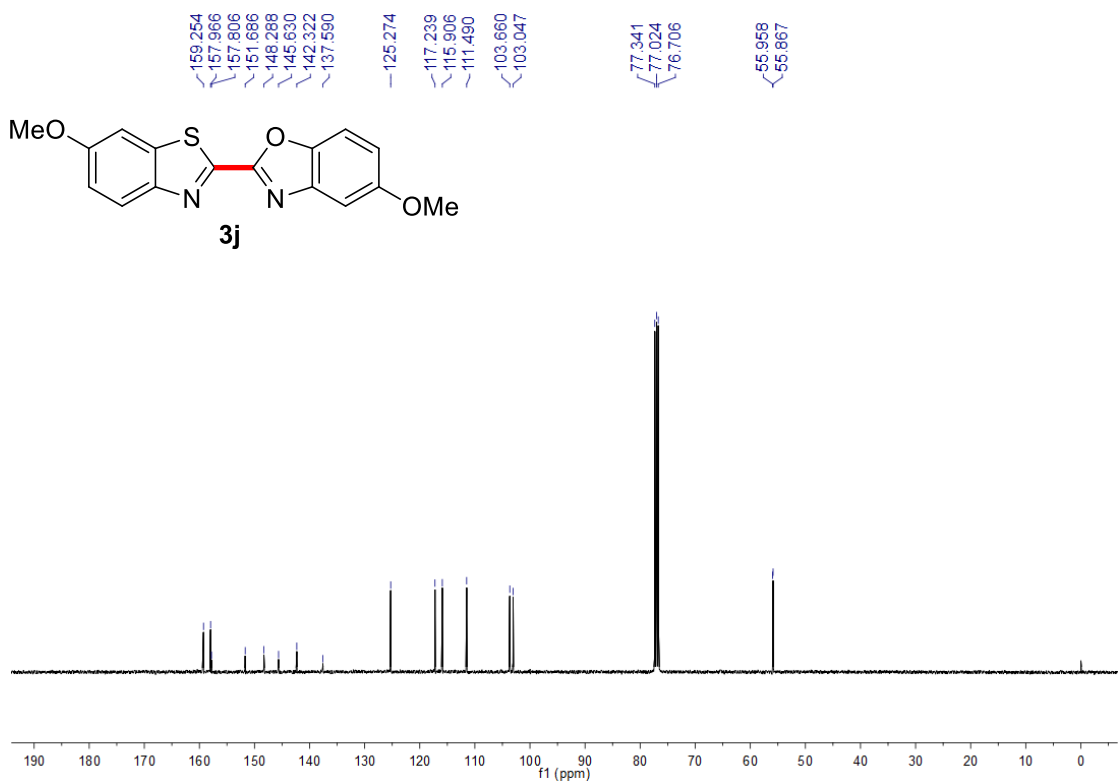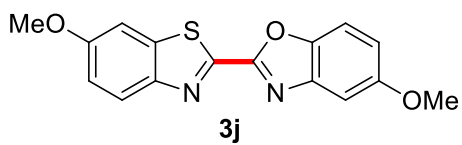

3k

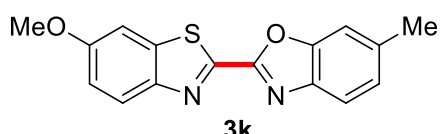

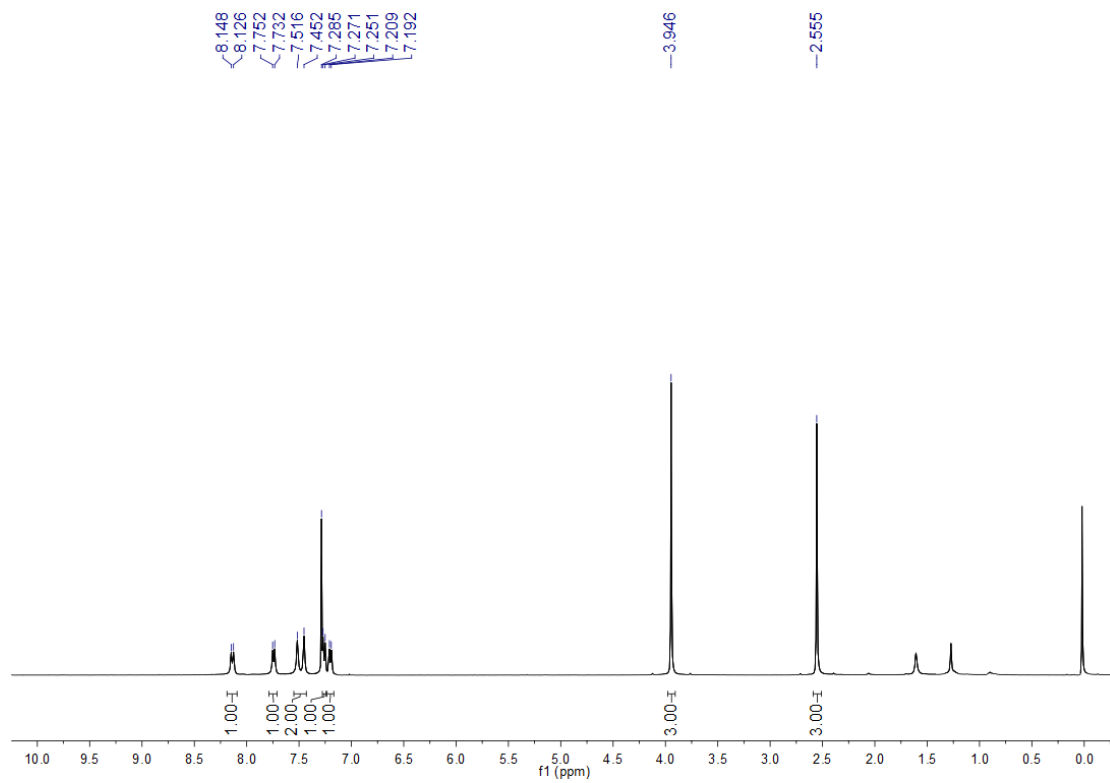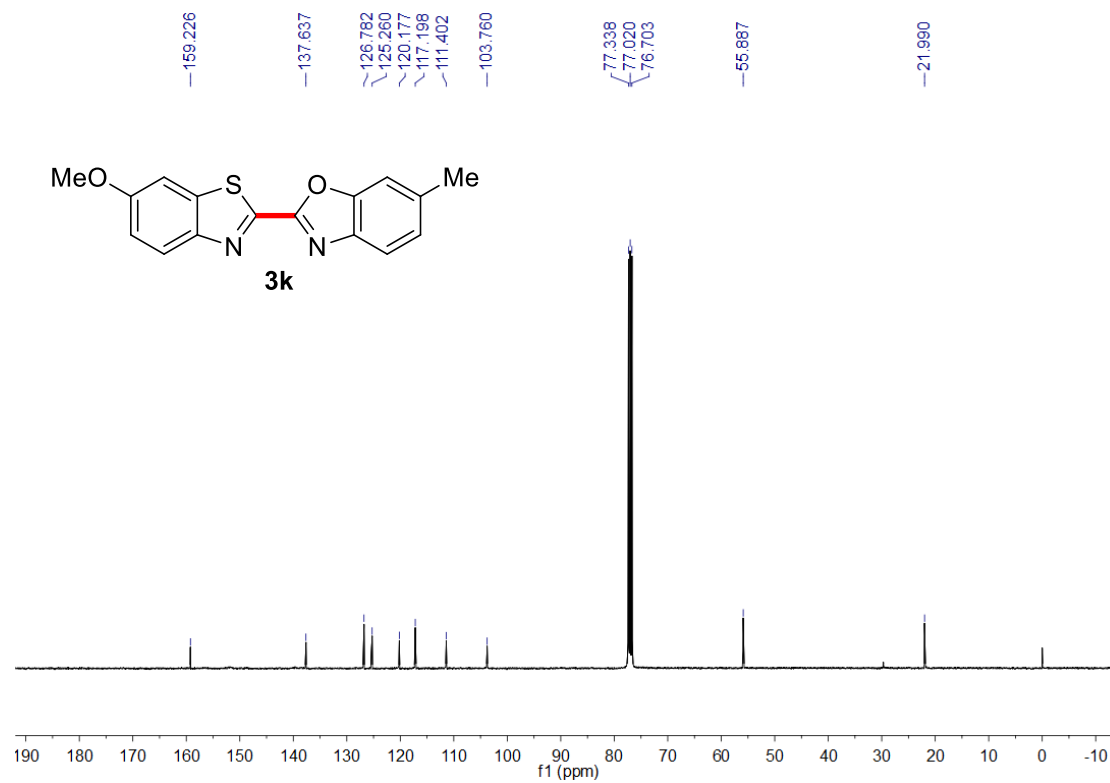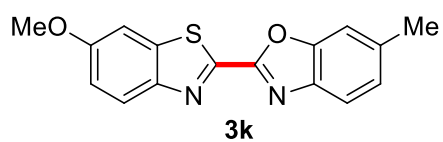

3l

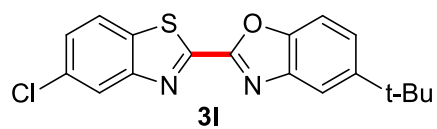

S27

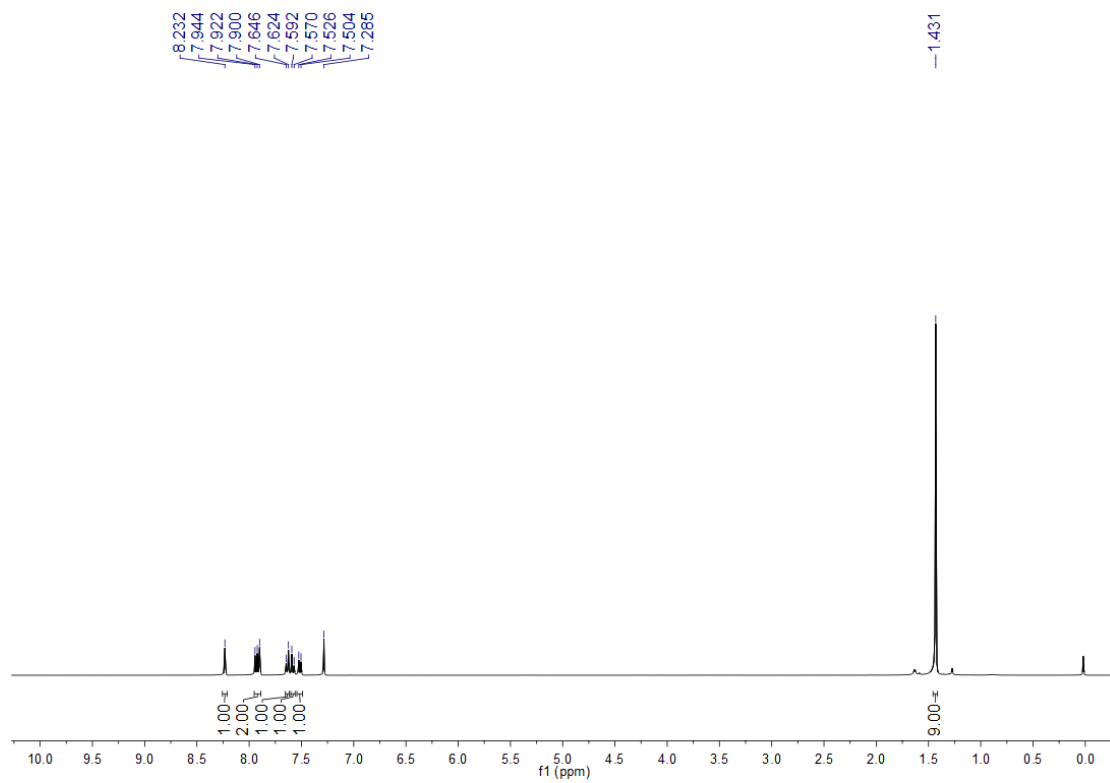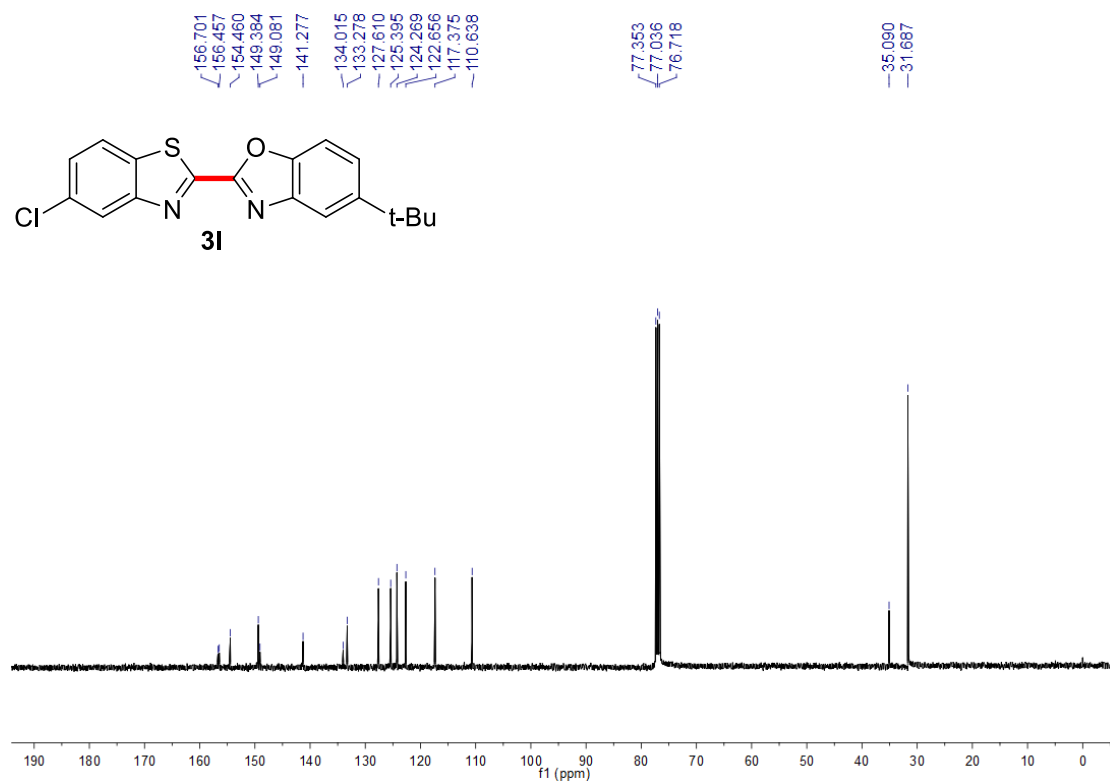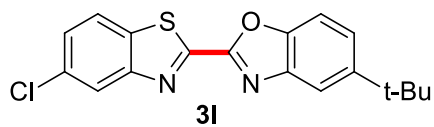

3m

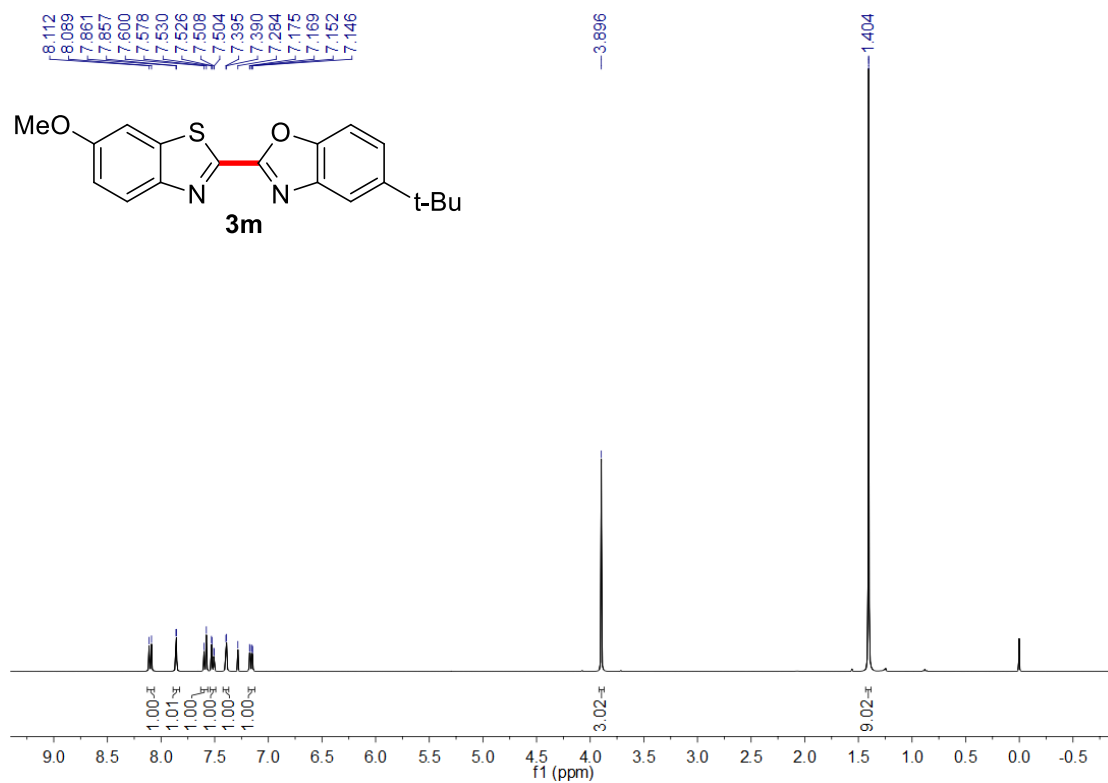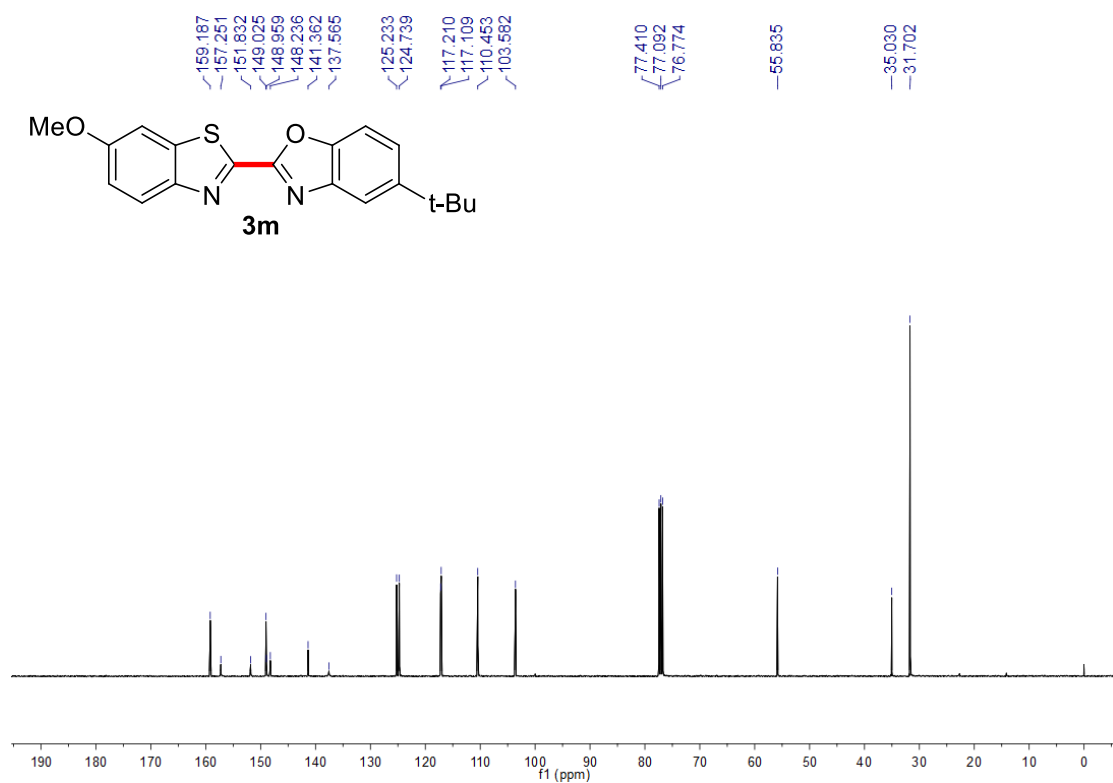

3n

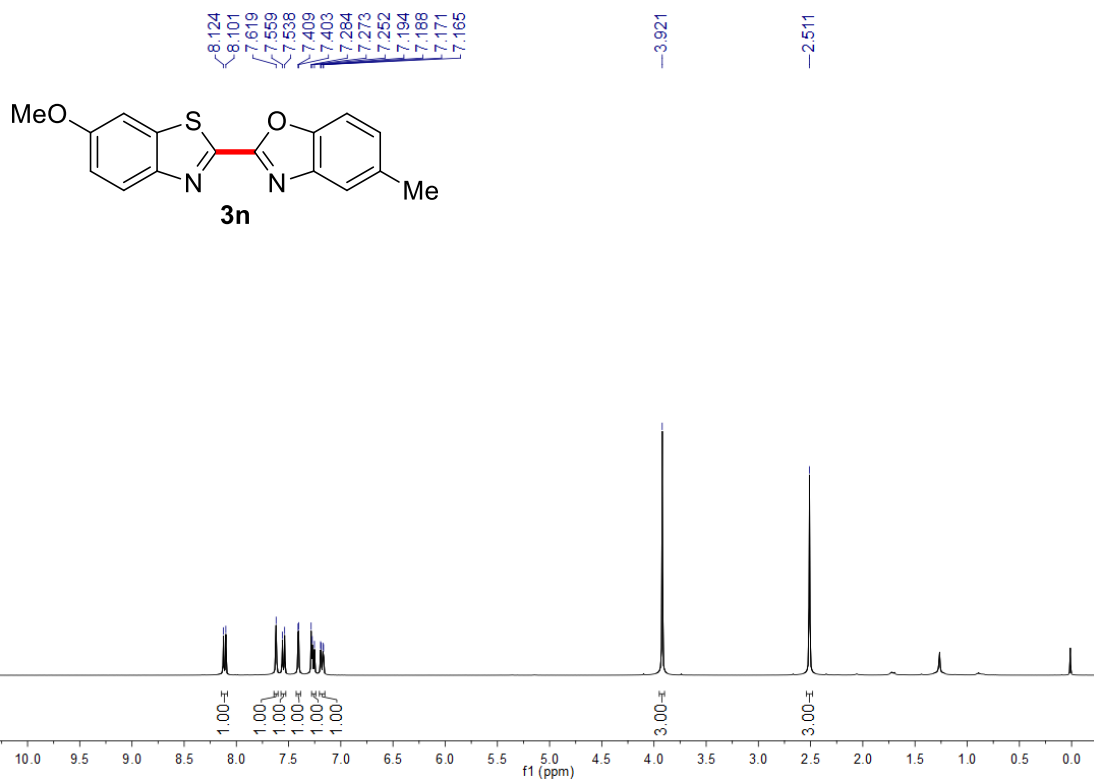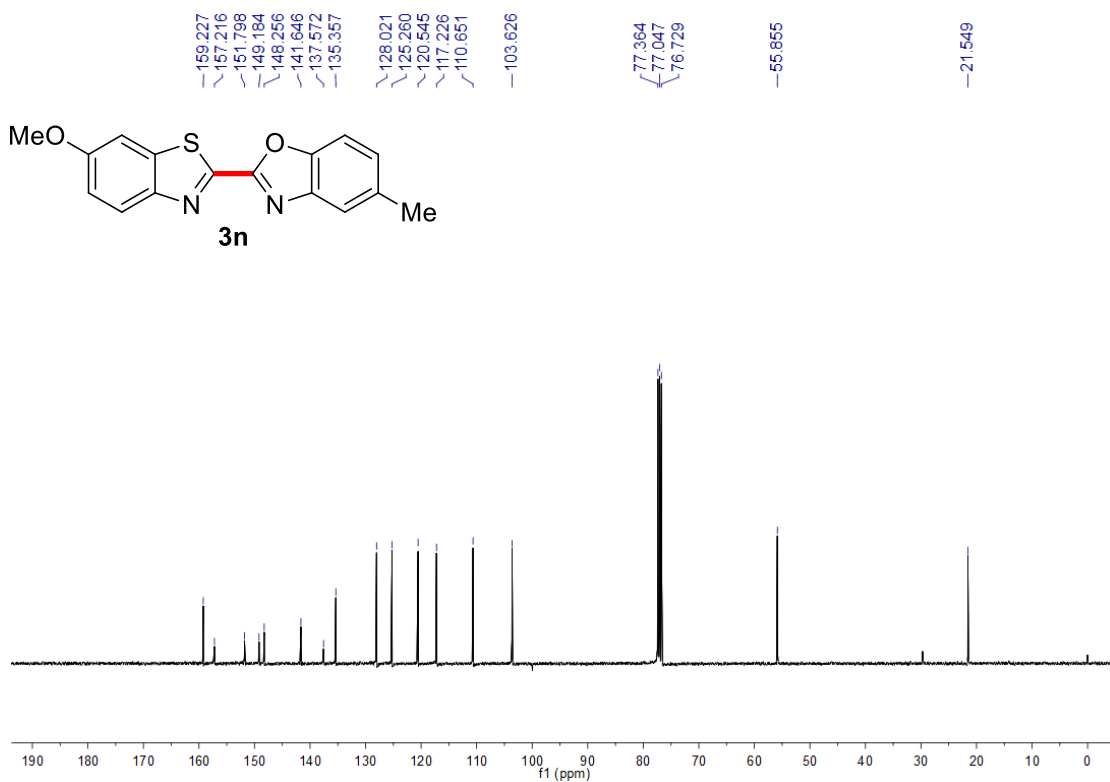

3o

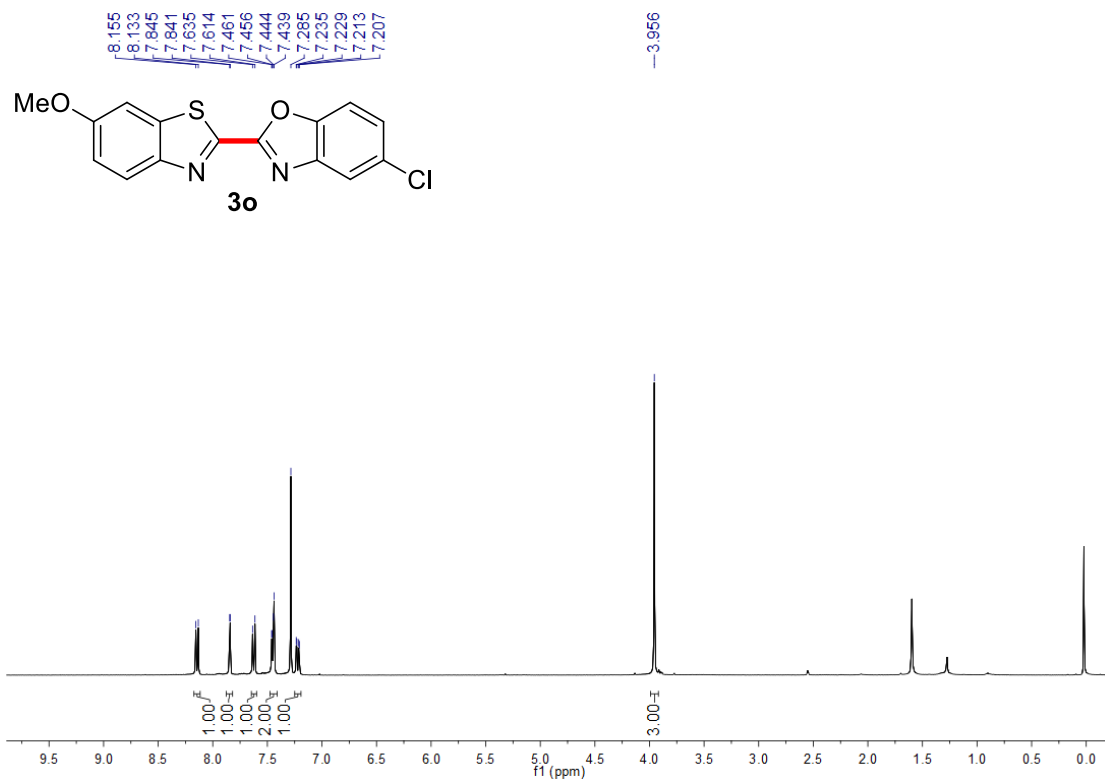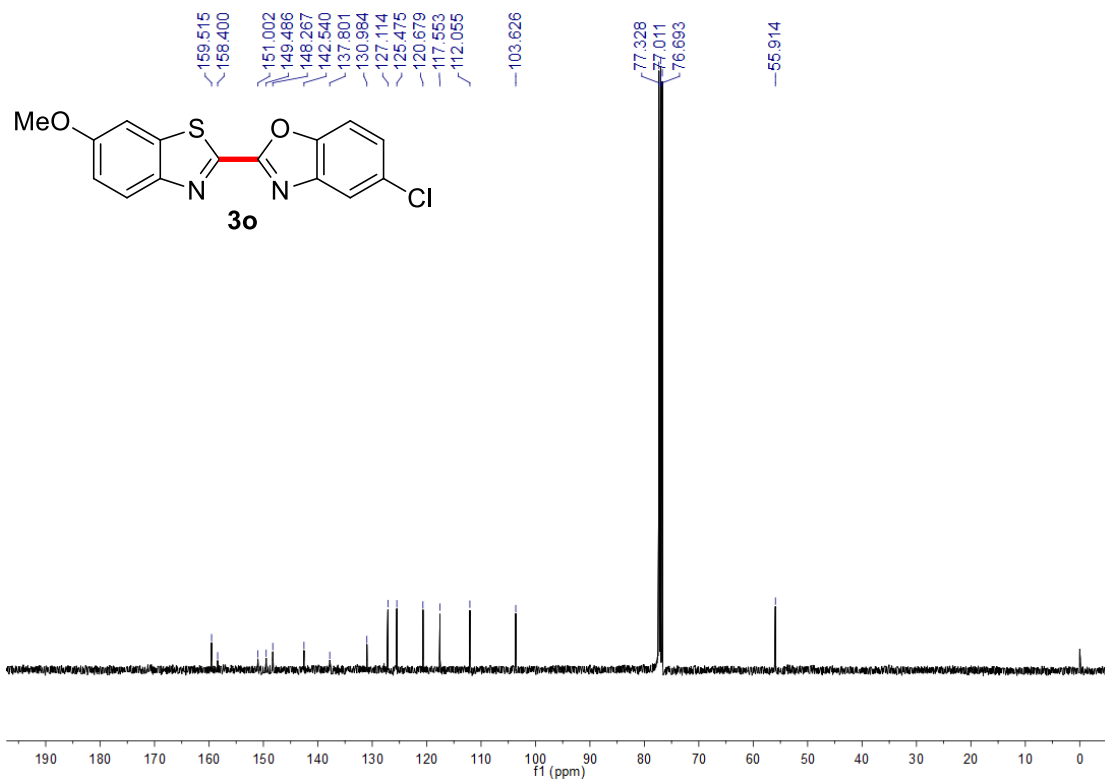

3p

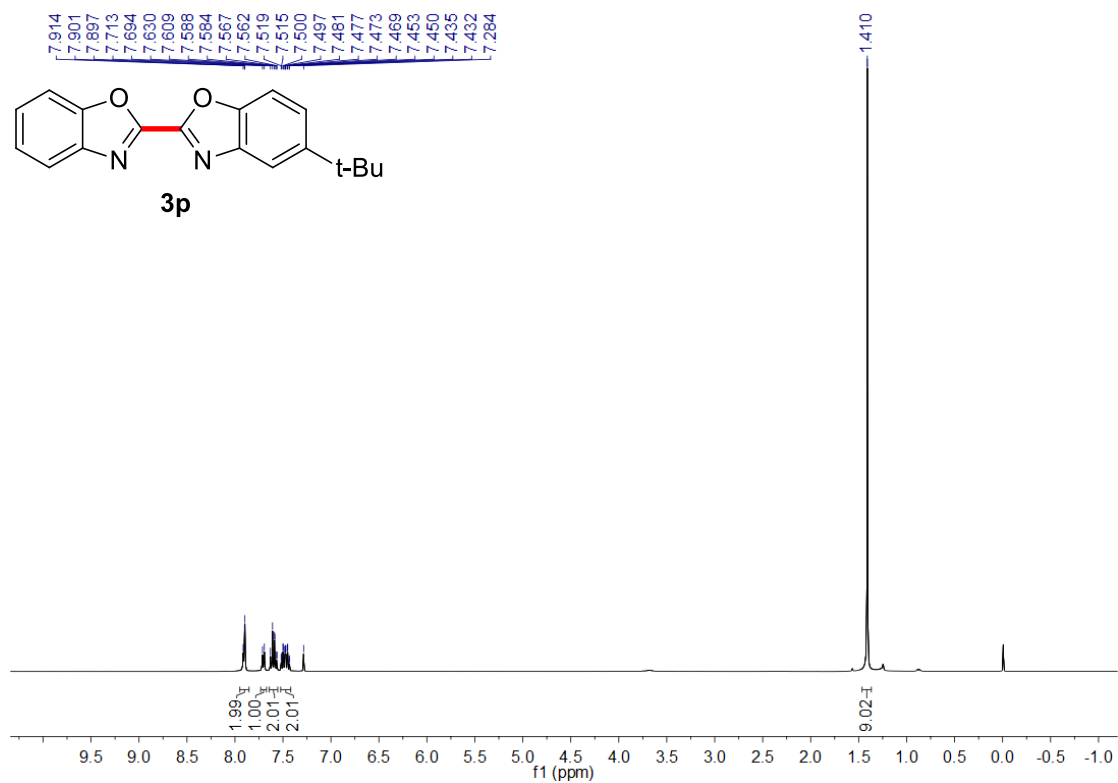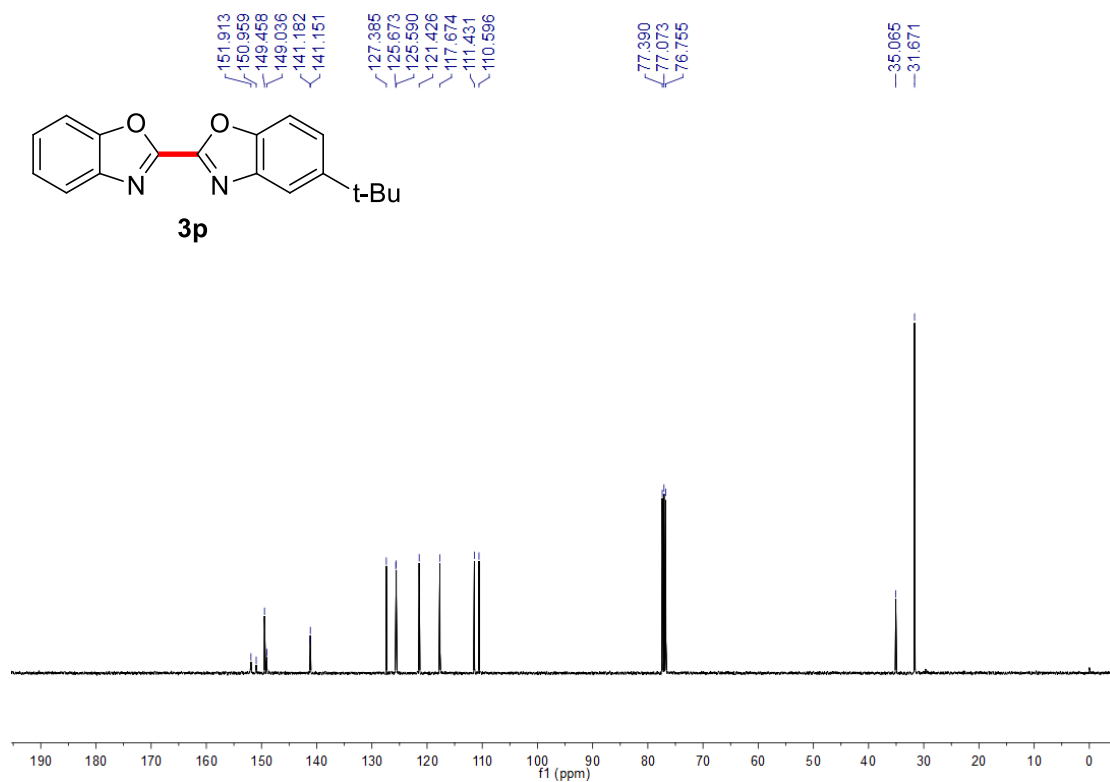

3q



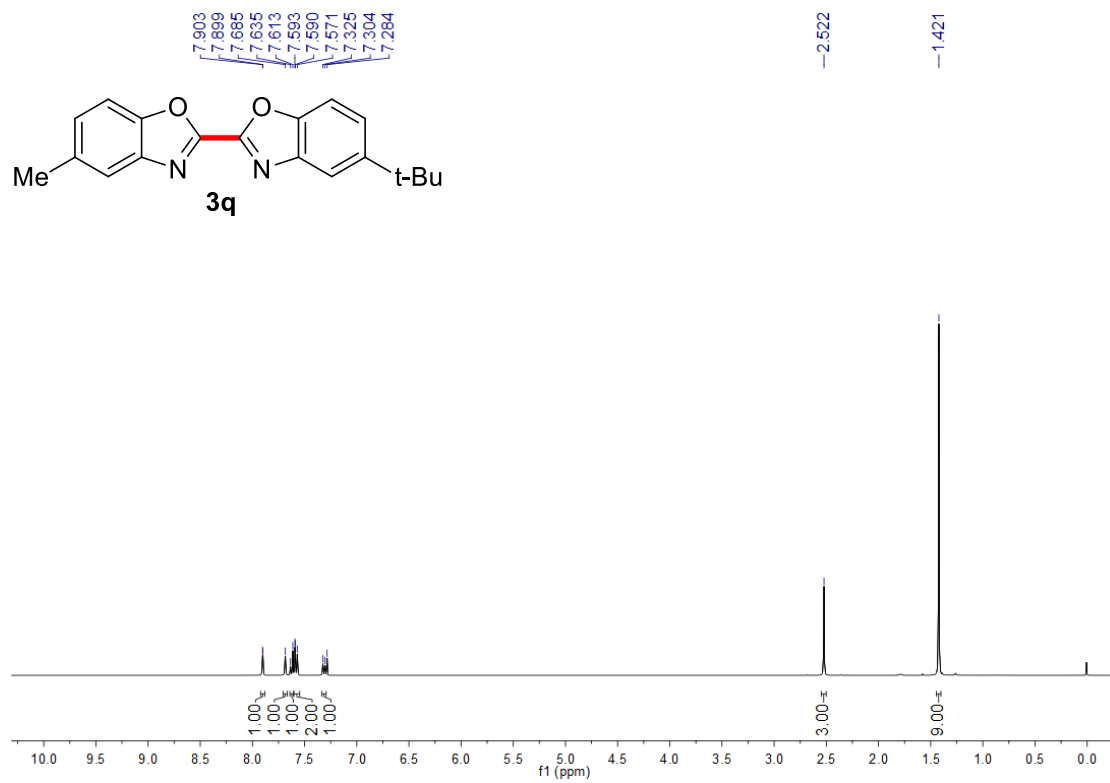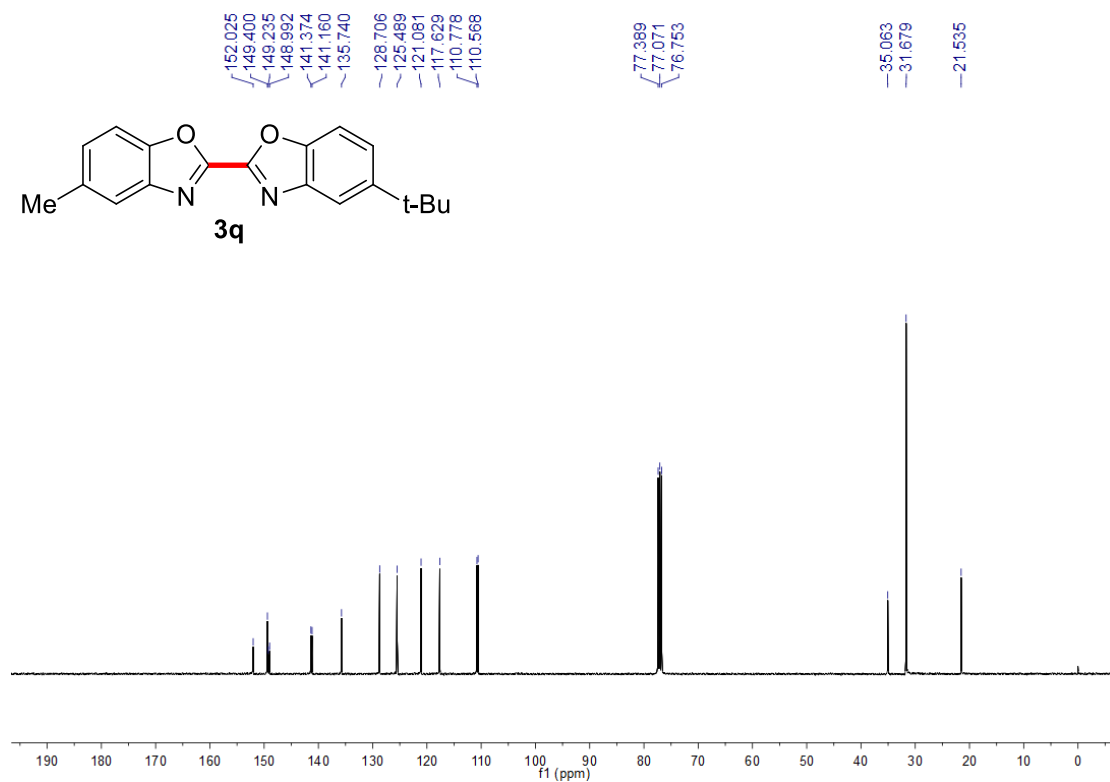

3r

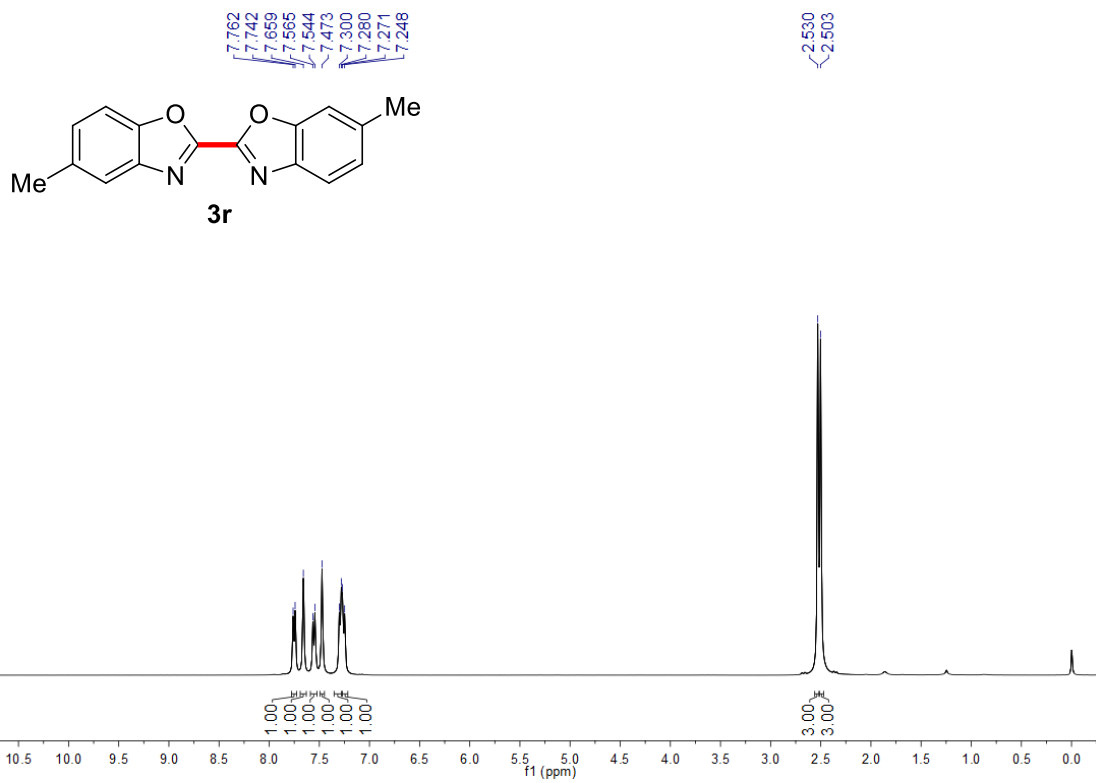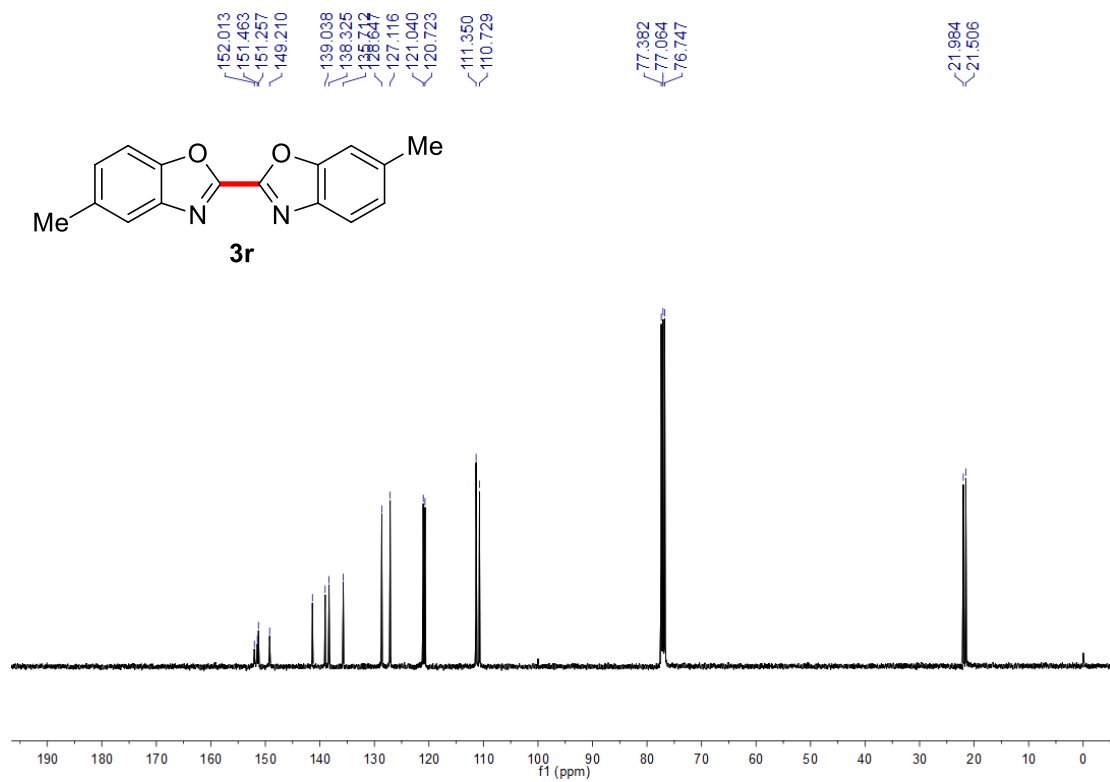

3s

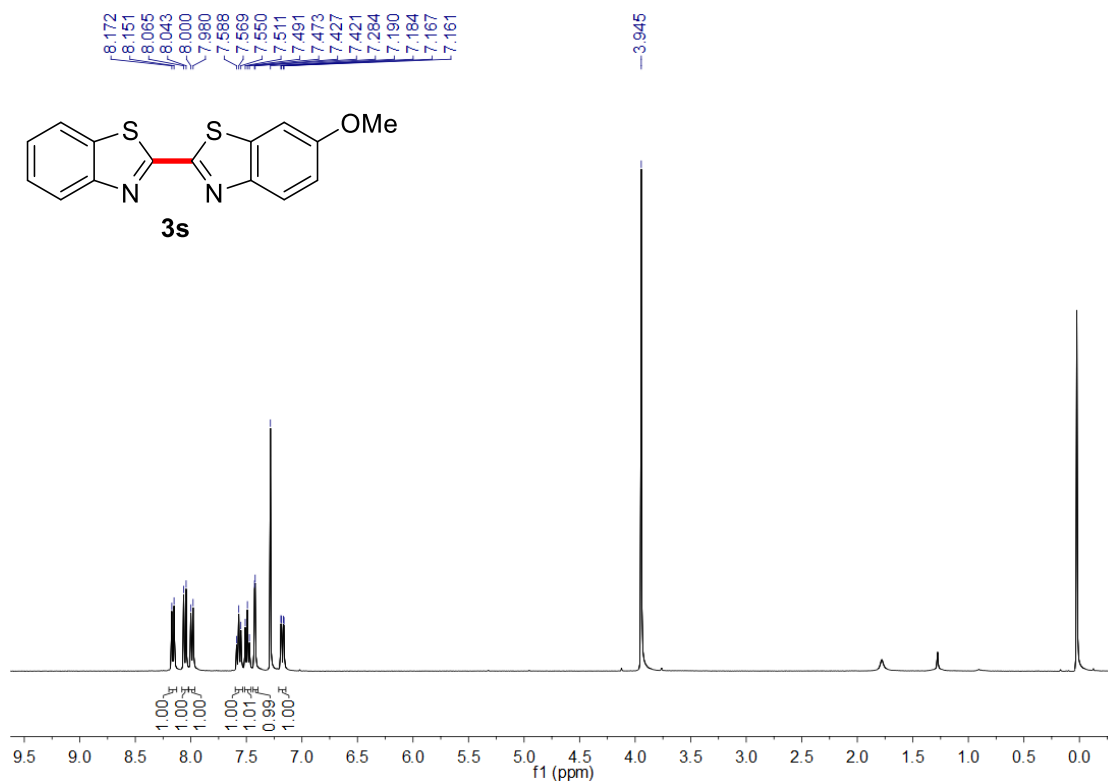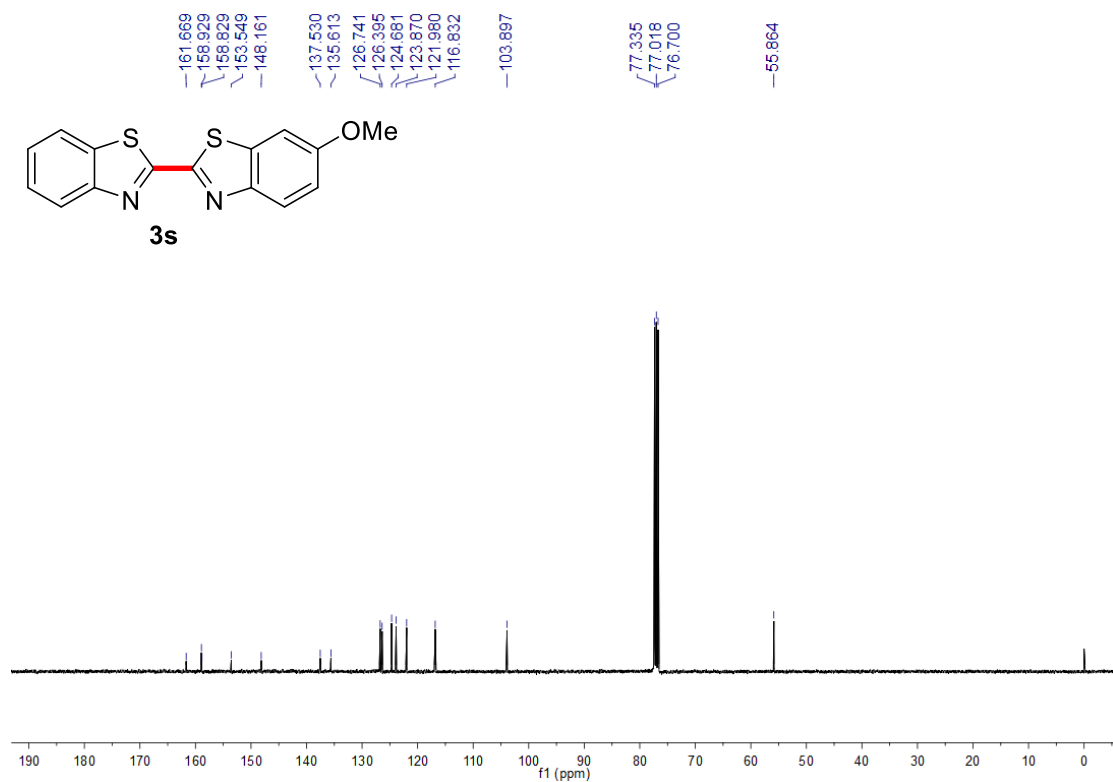

3t

7.922  
7.920  
7.916  
7.904  
7.900  
7.868  
7.864  
7.846  
7.708  
7.704  
7.691  
7.686  
7.668  
7.522  
7.519  
7.517  
7.513  
7.502  
7.498  
7.494  
7.481  
7.476  
7.462  
7.459  
7.455  
7.452  
7.449  
7.440  
7.433  
7.285

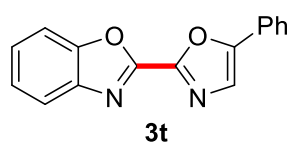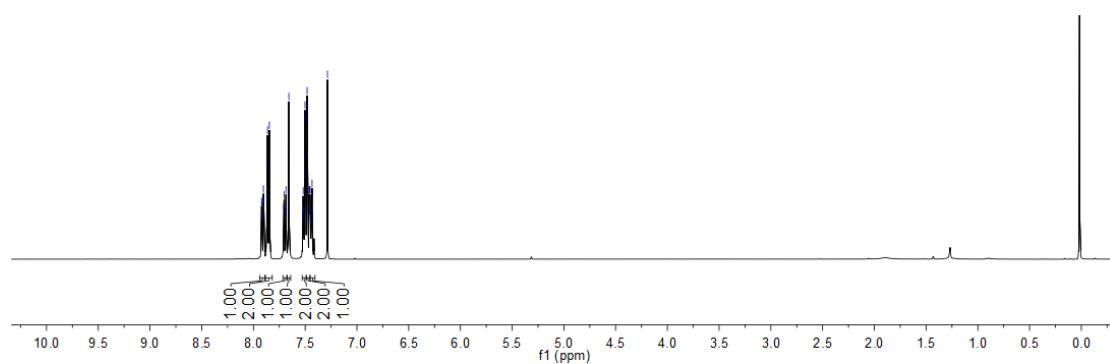

154.049  
151.748  
150.637  
150.512  
141.222  
129.669  
129.104  
126.892  
125.506  
125.002  
124.376  
121.286  
77.364  
77.046  
76.729

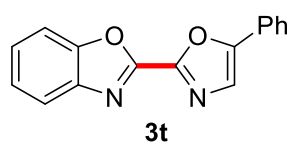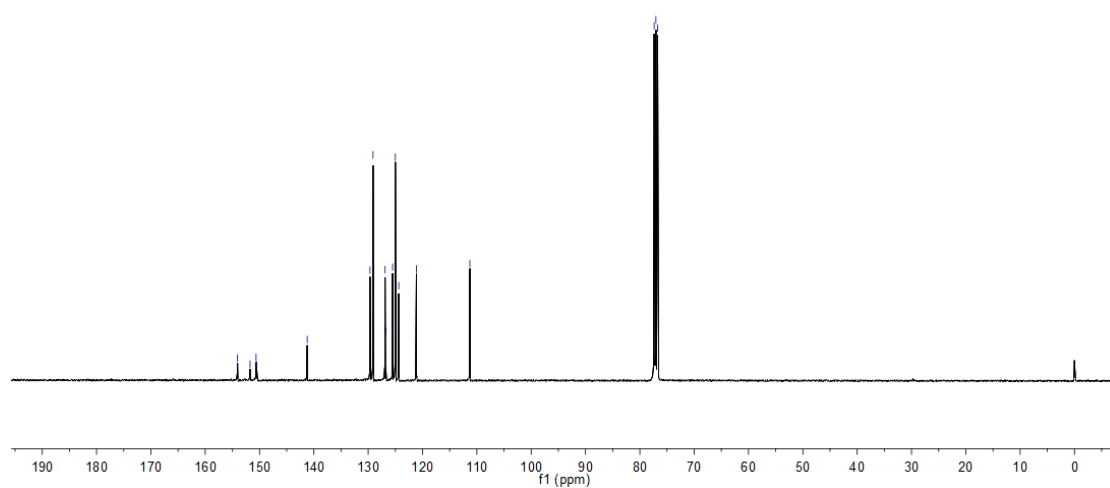

3u

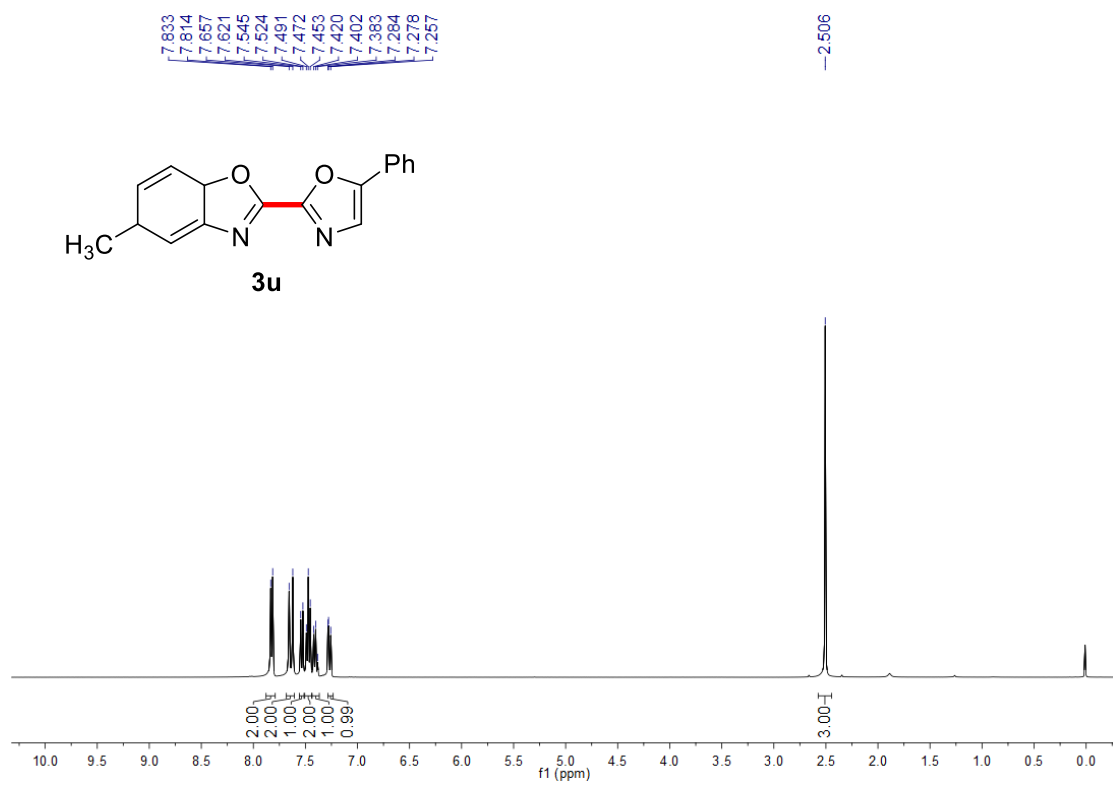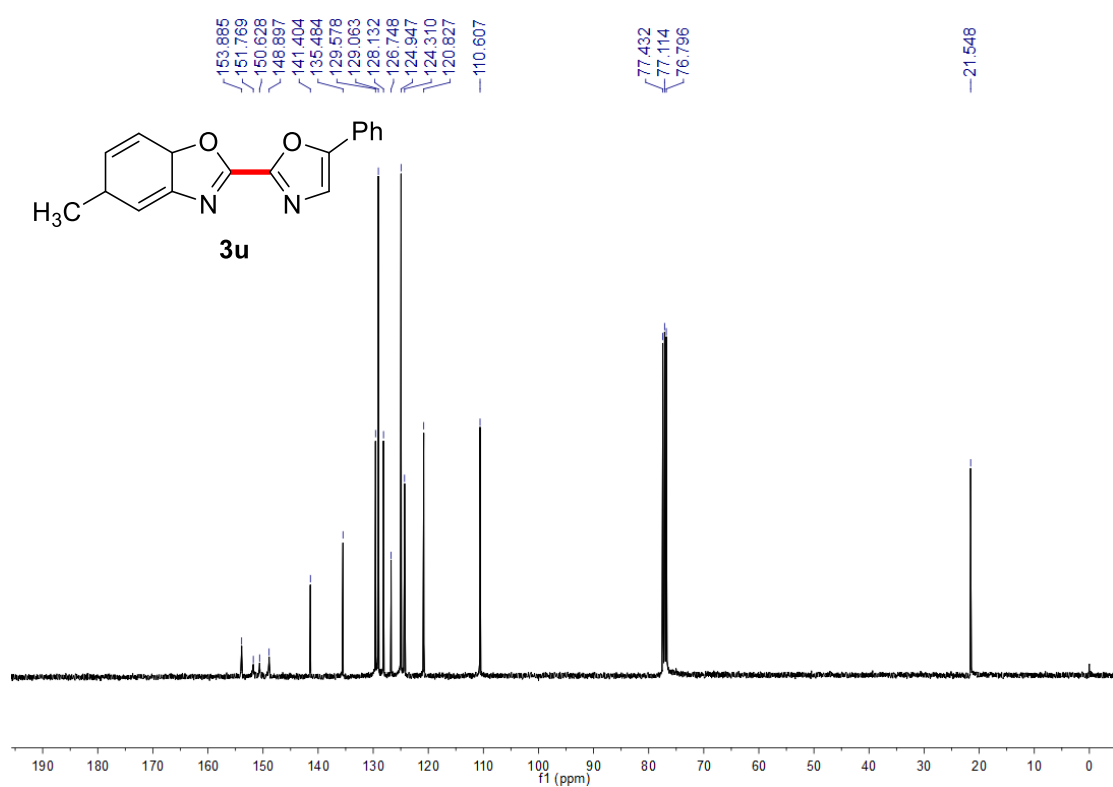

3v

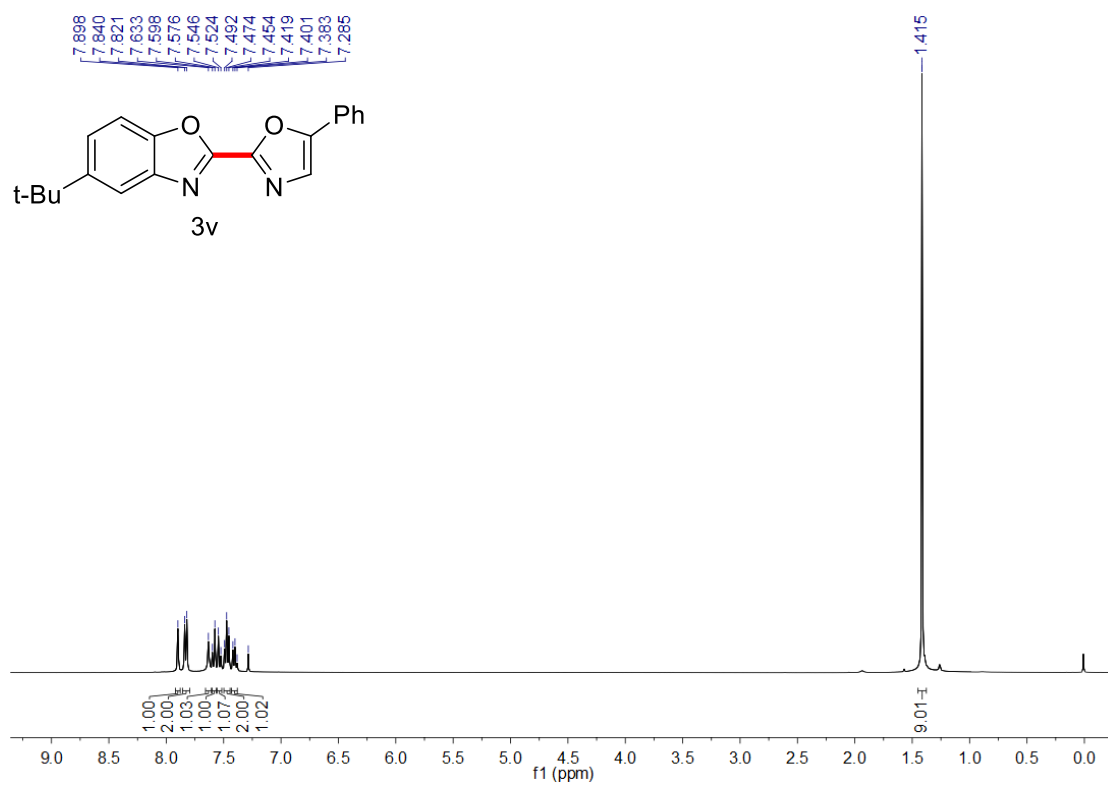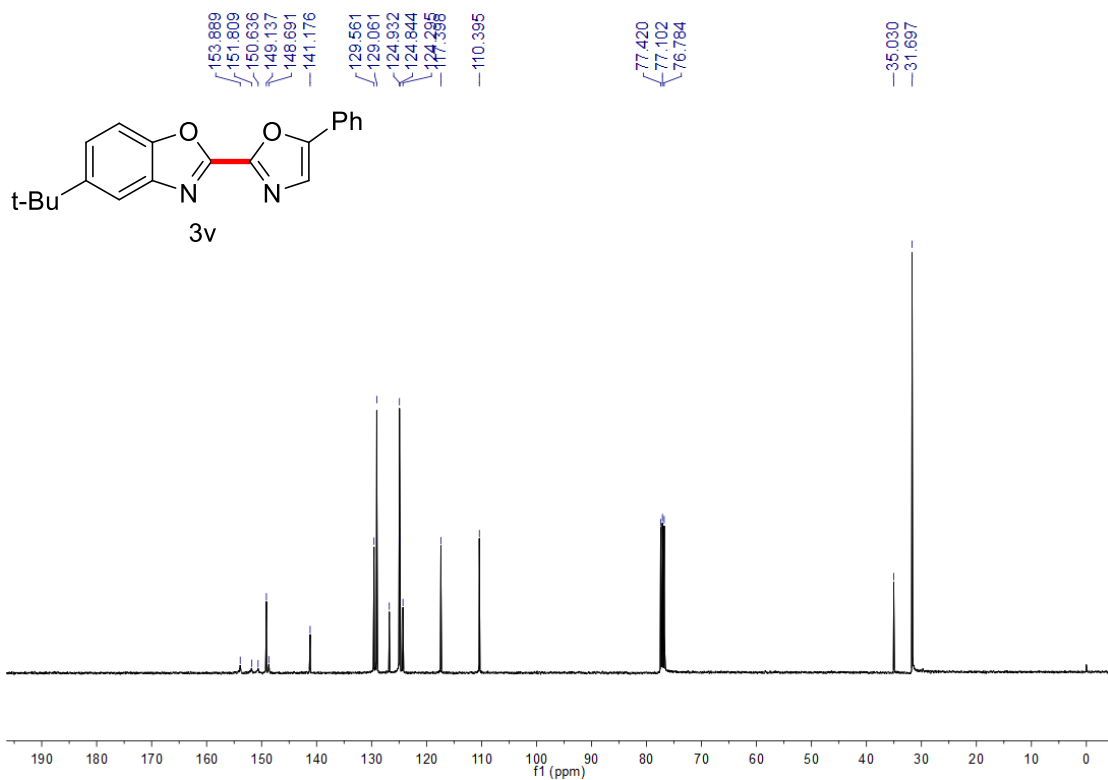

3w

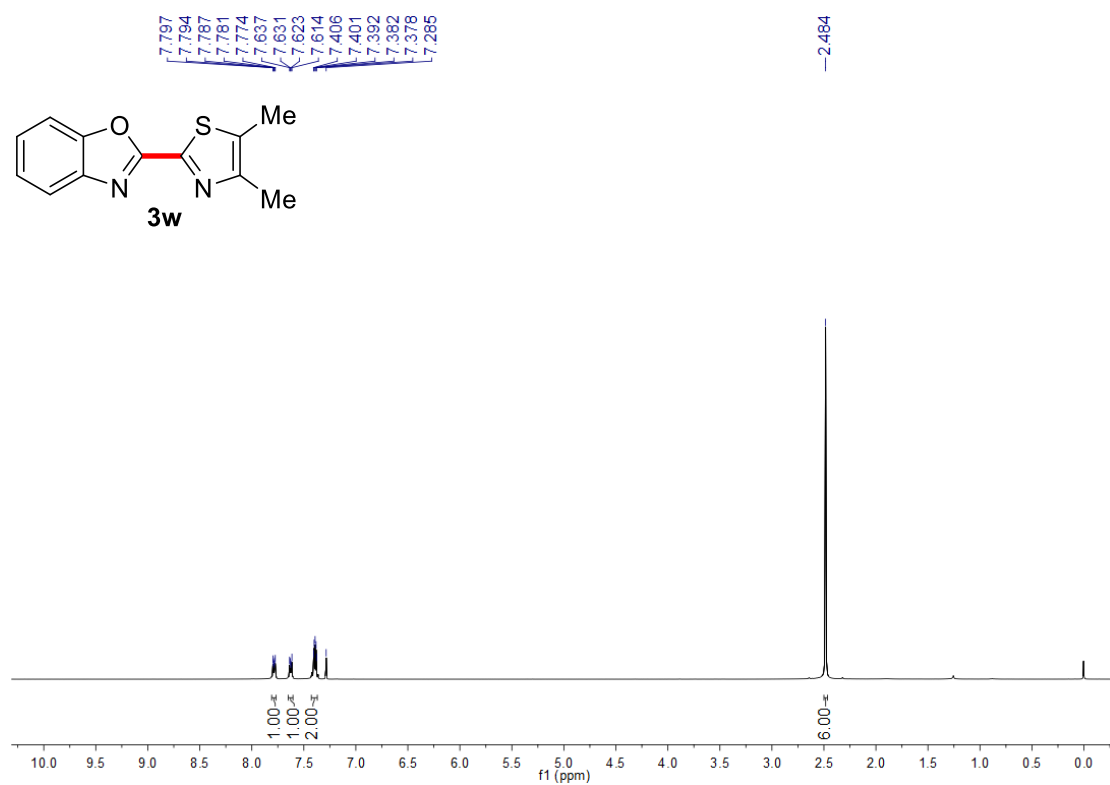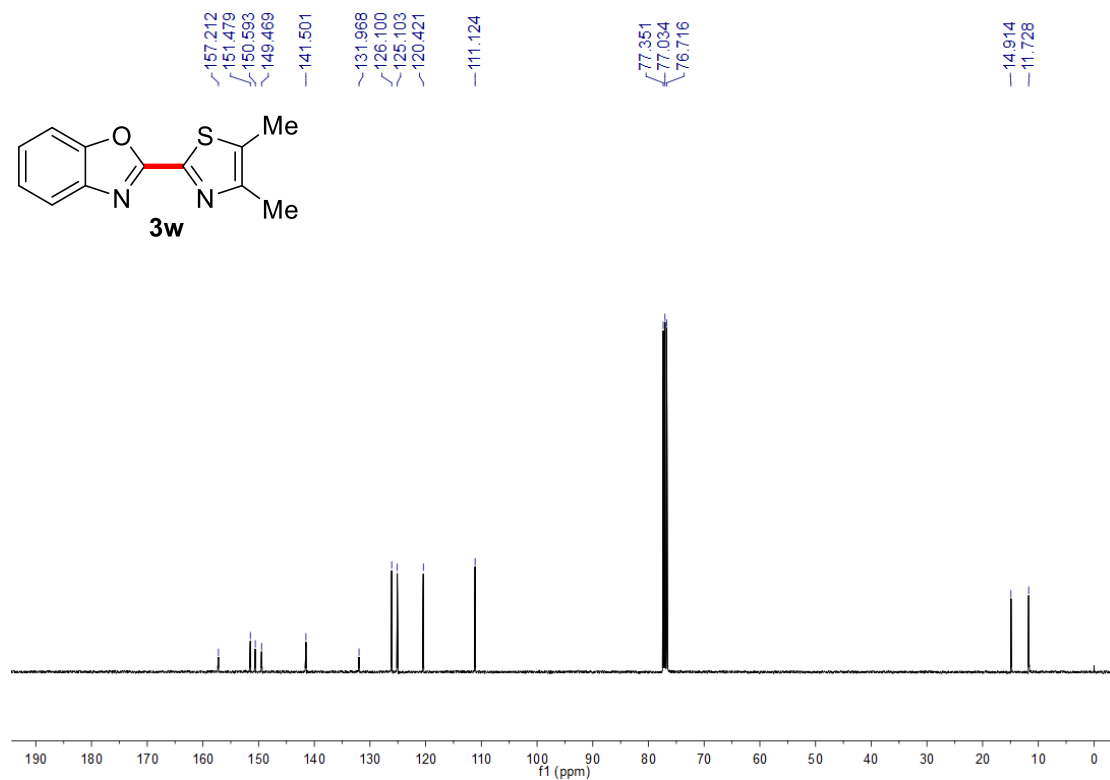

3x

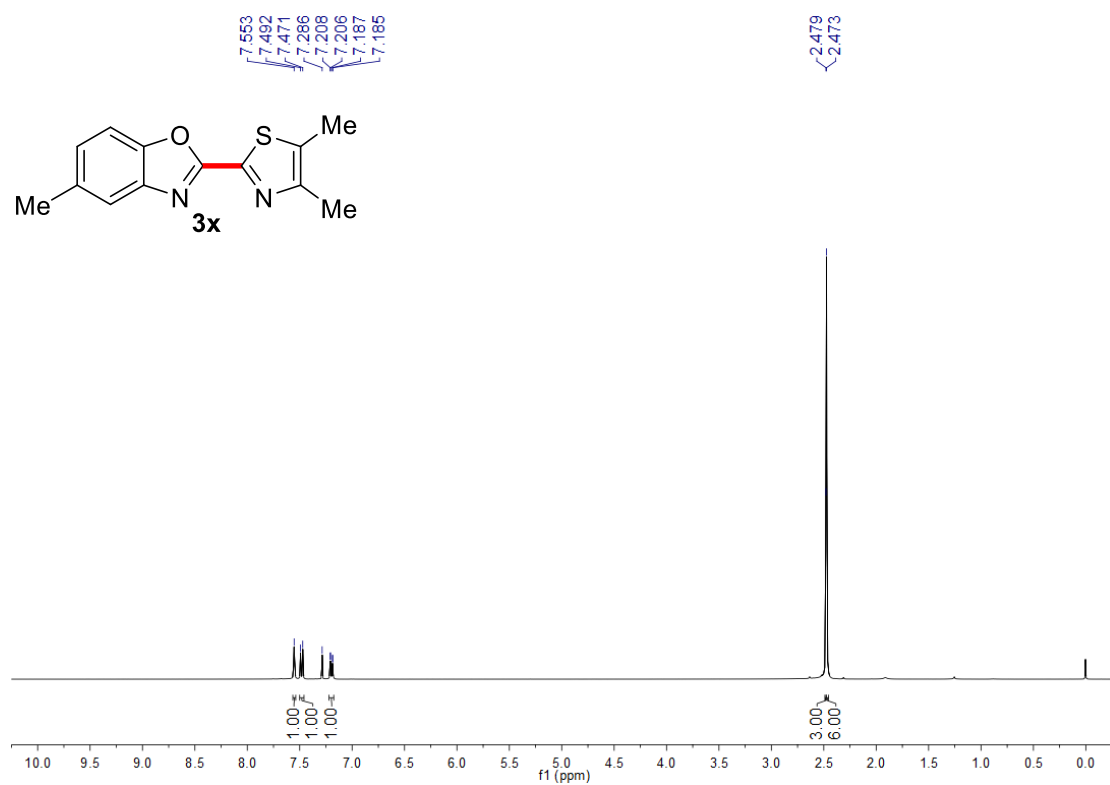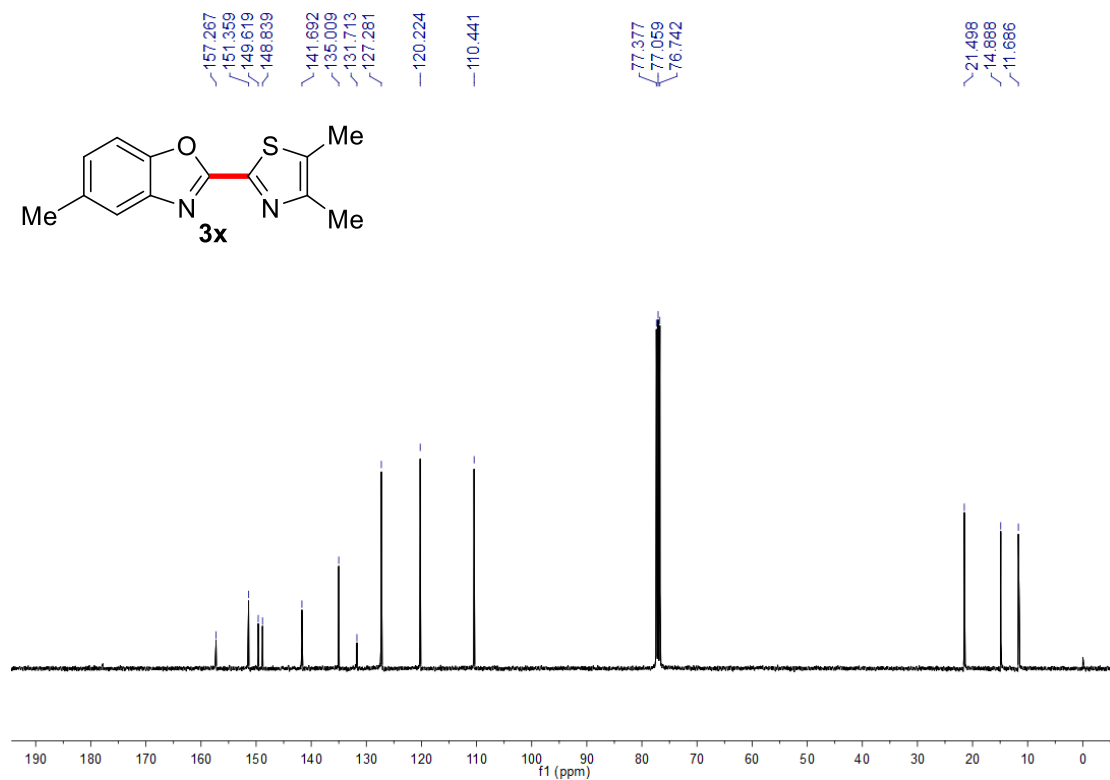



3y

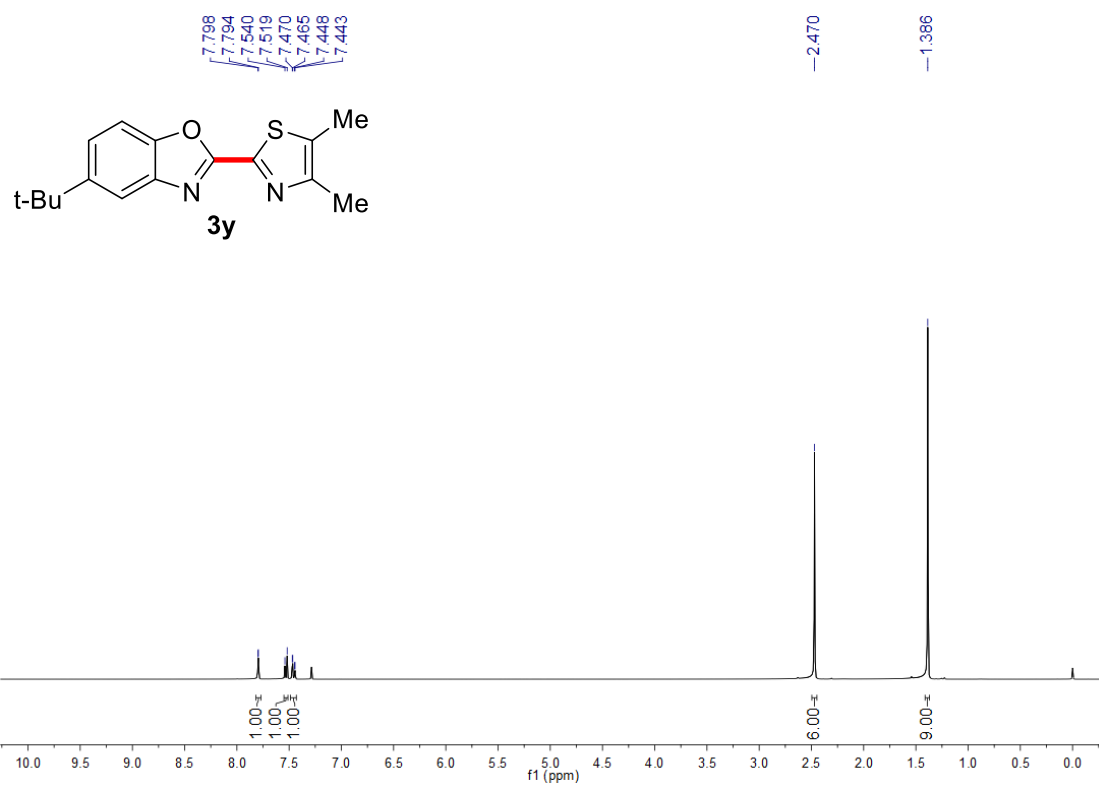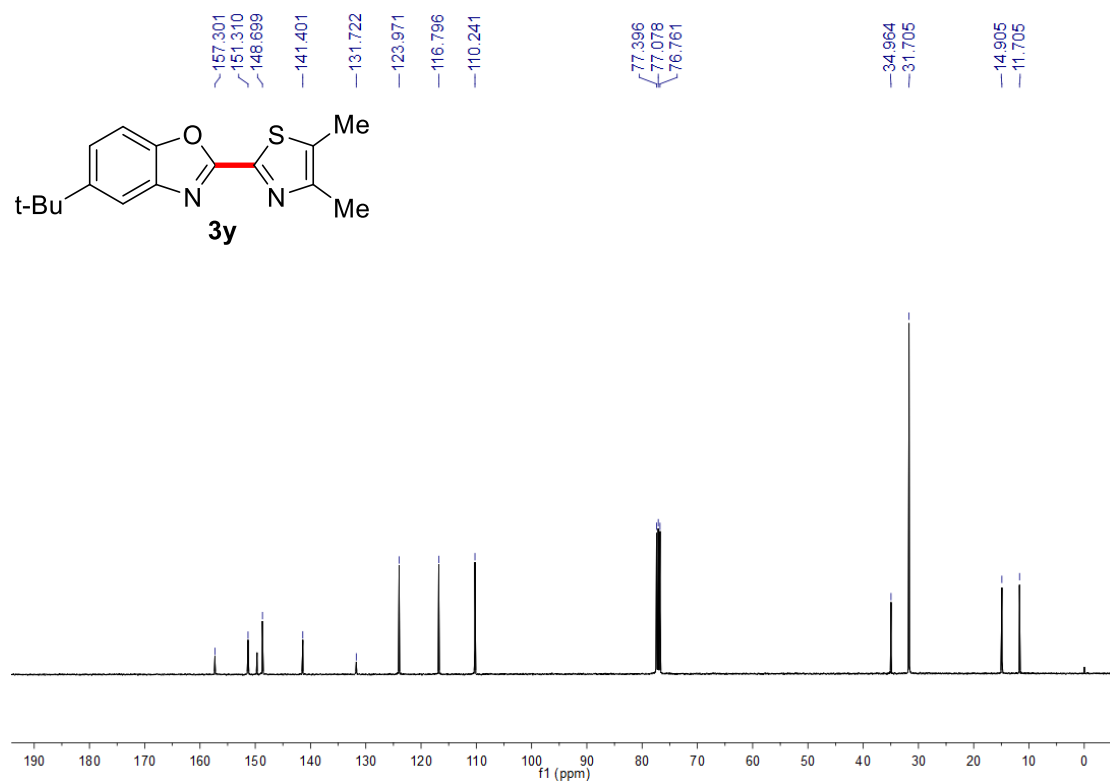

3z

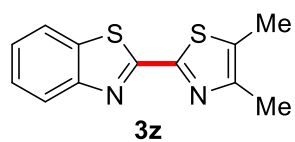

S41

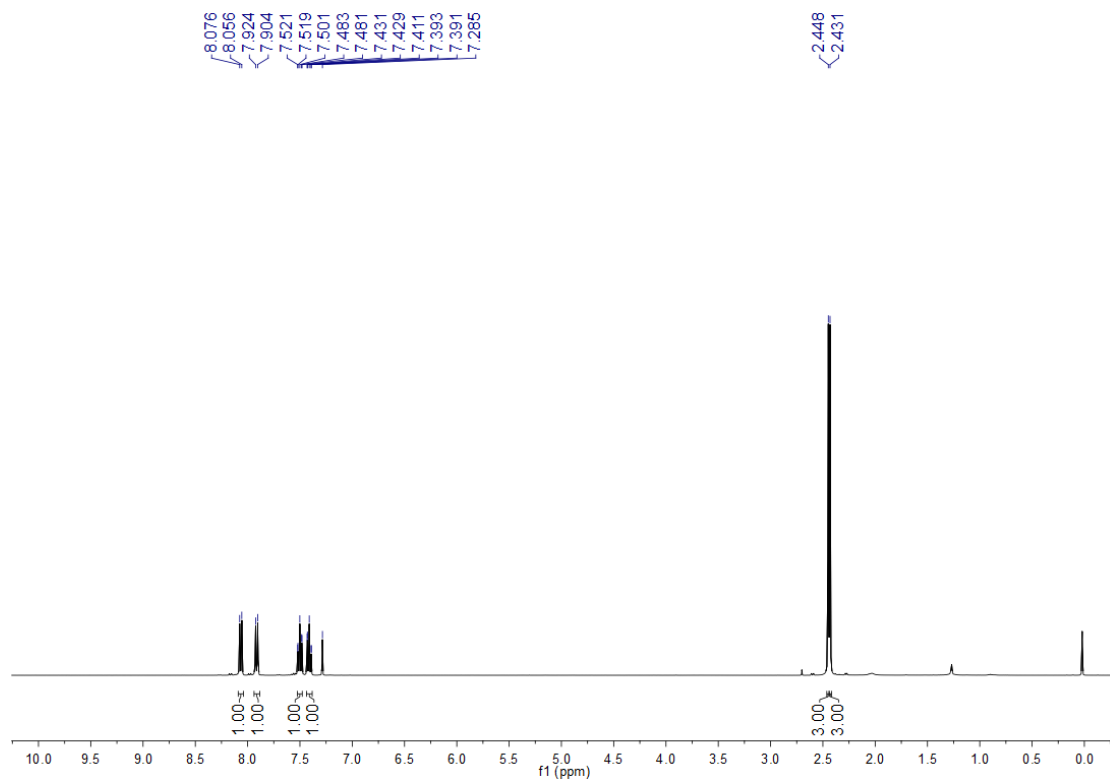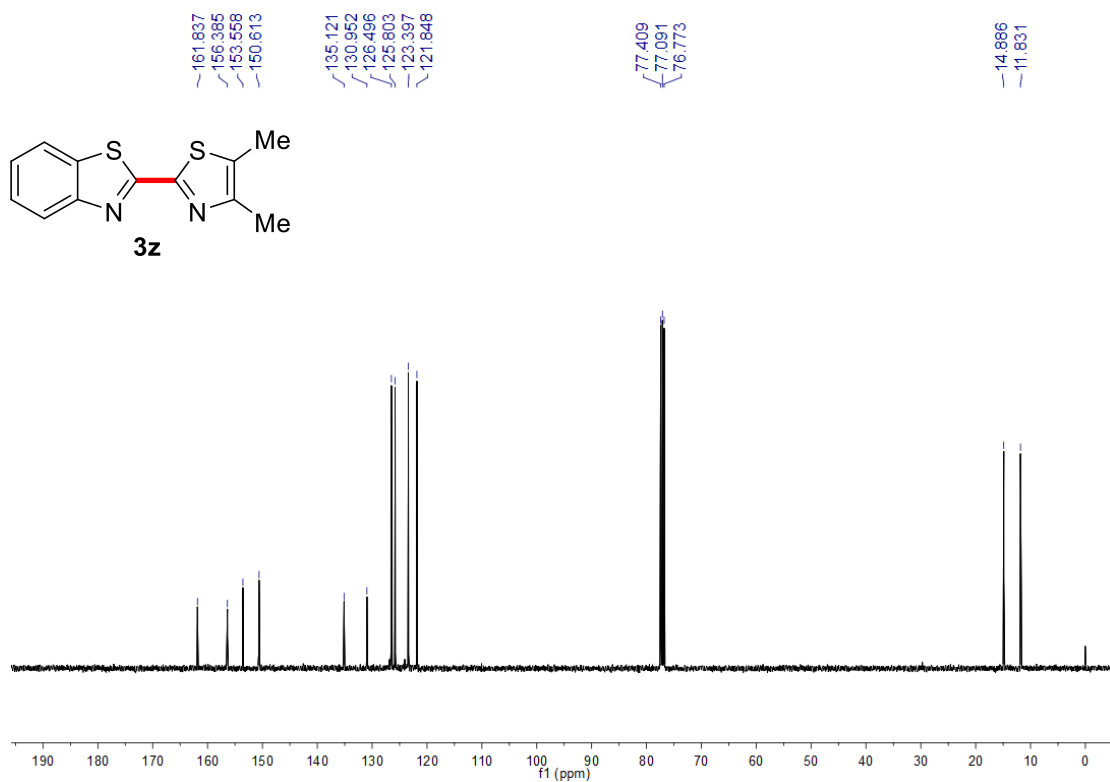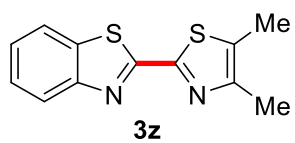

3a'

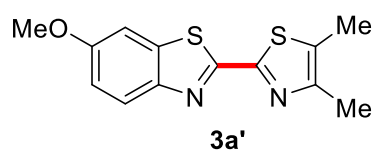

S42

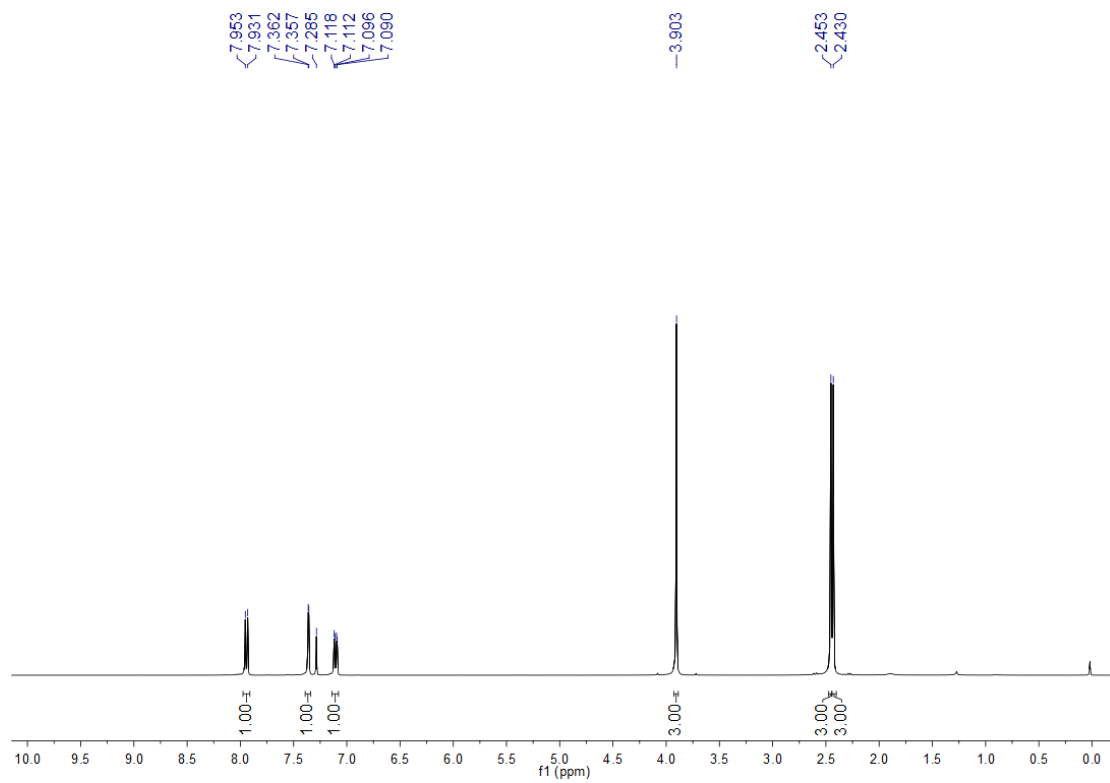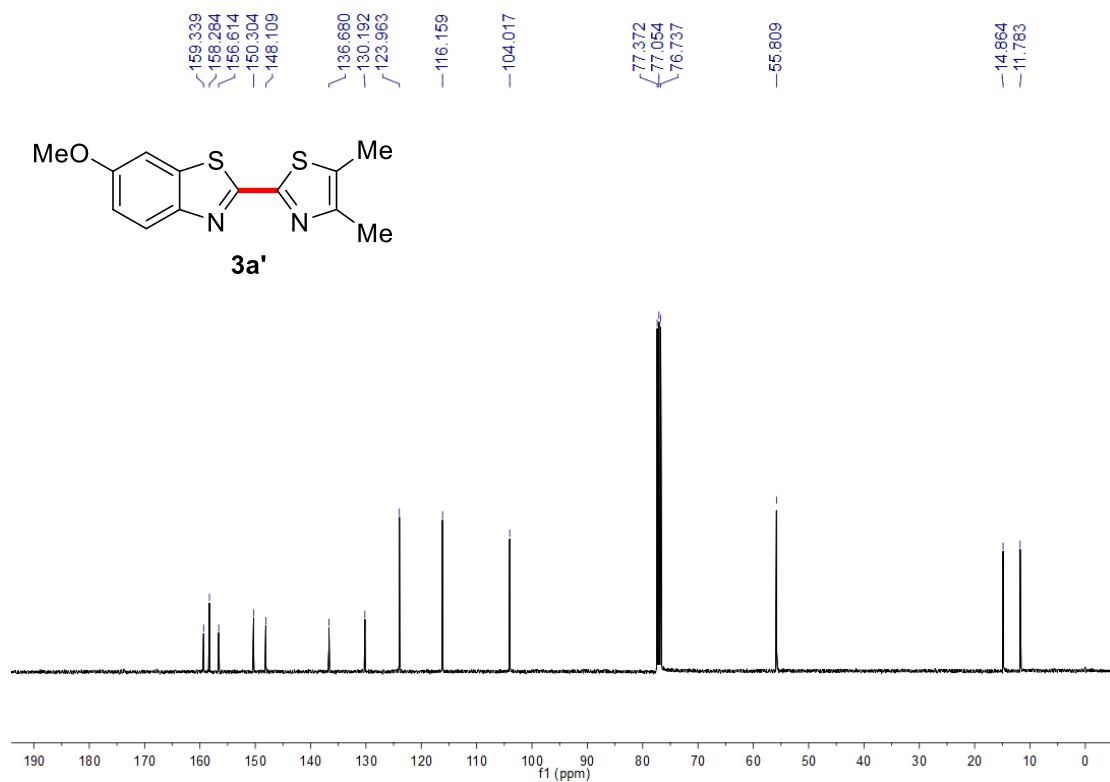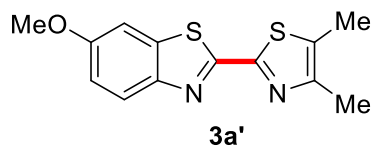

3b'

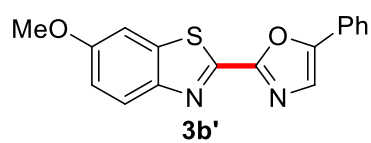

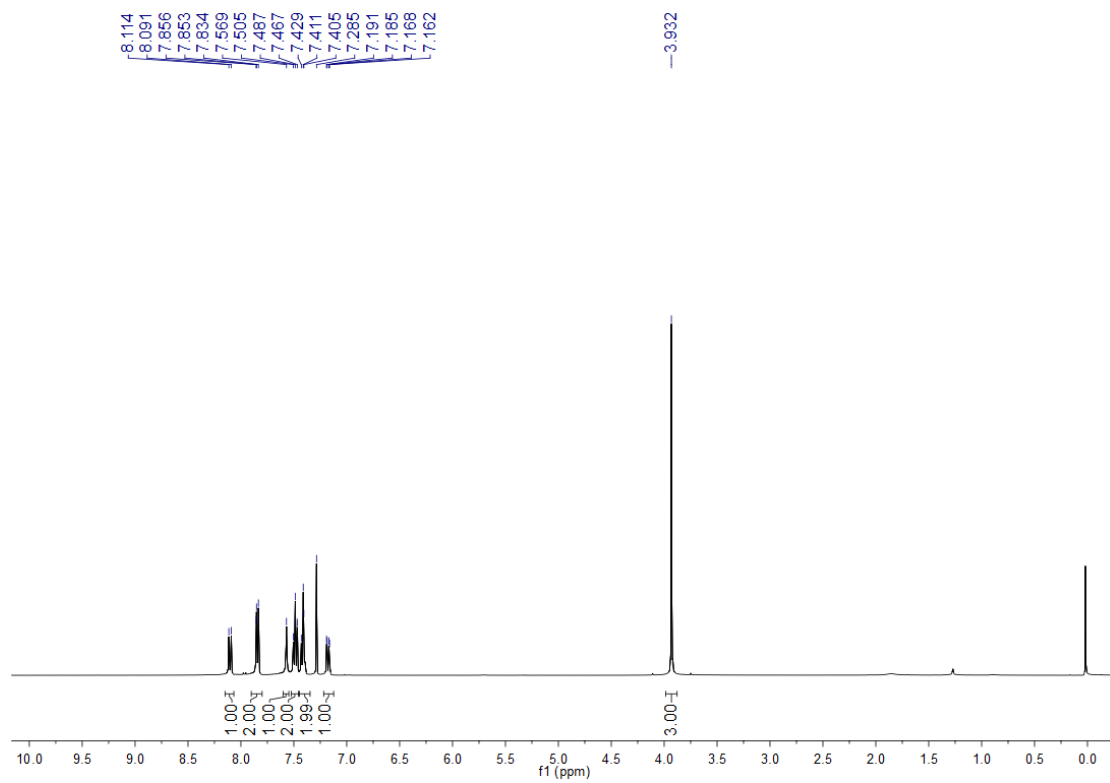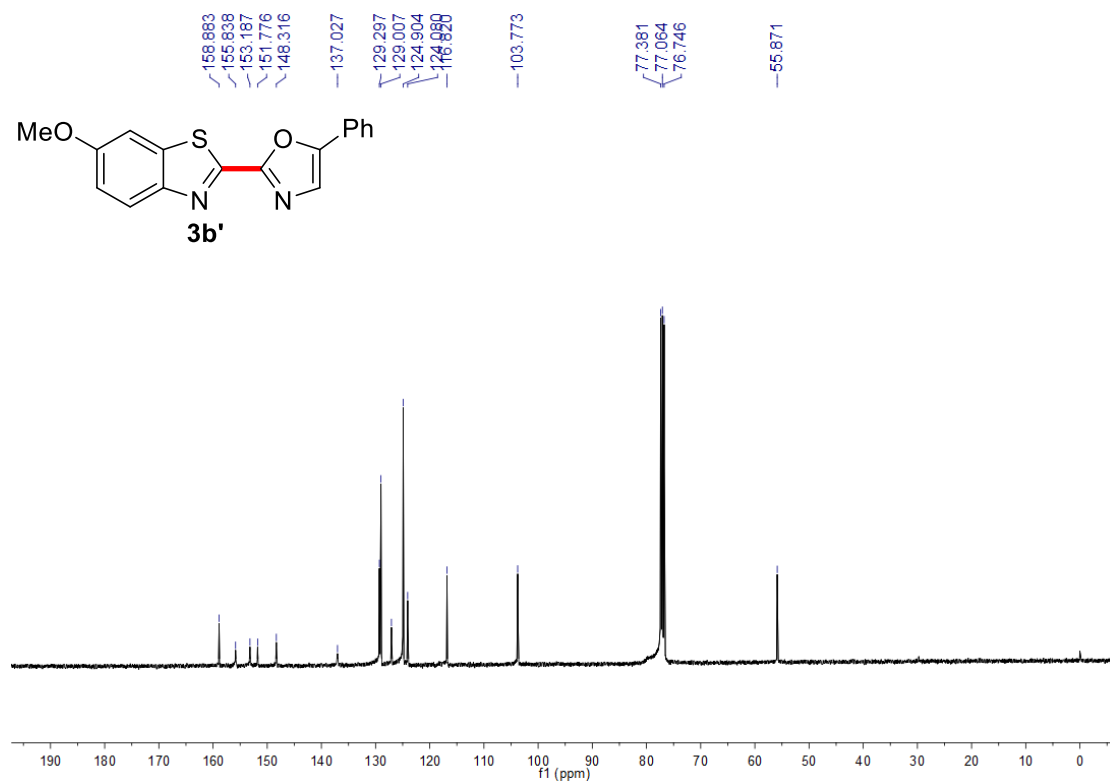

**3c'**

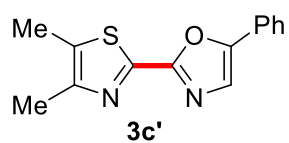

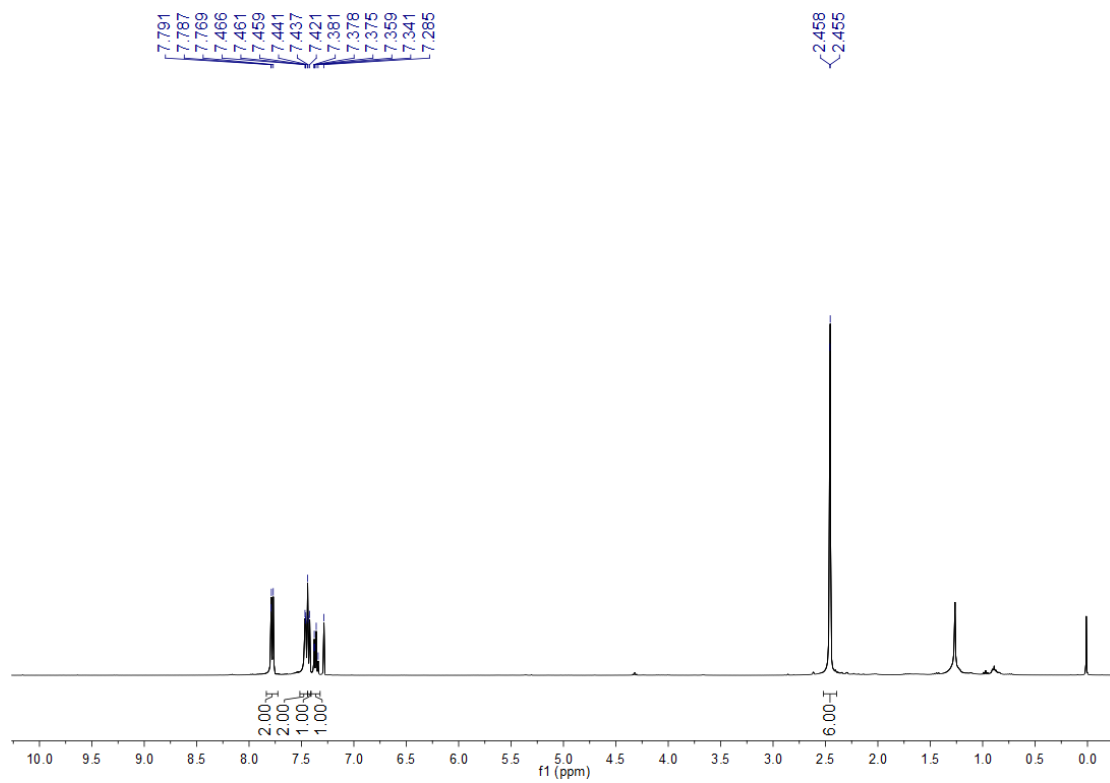

3d'

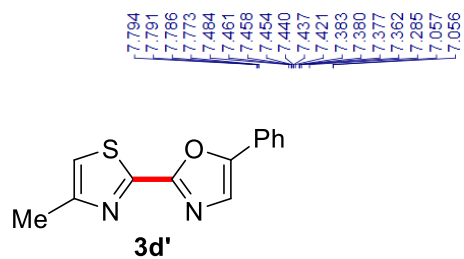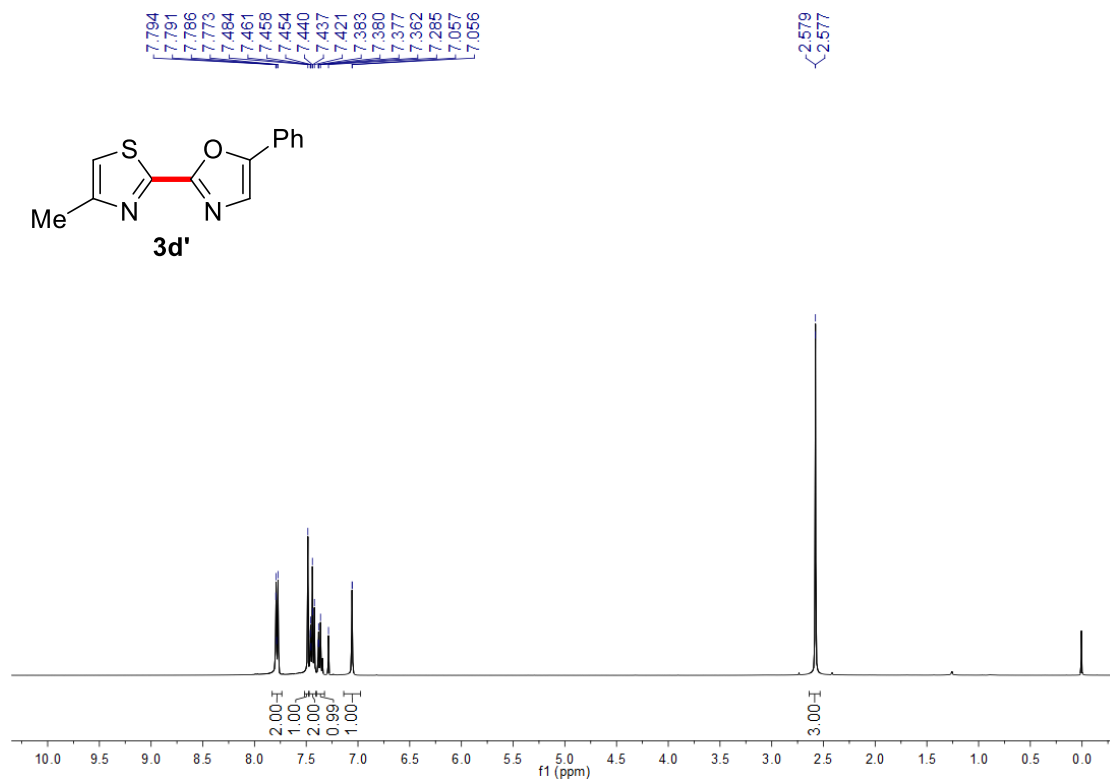

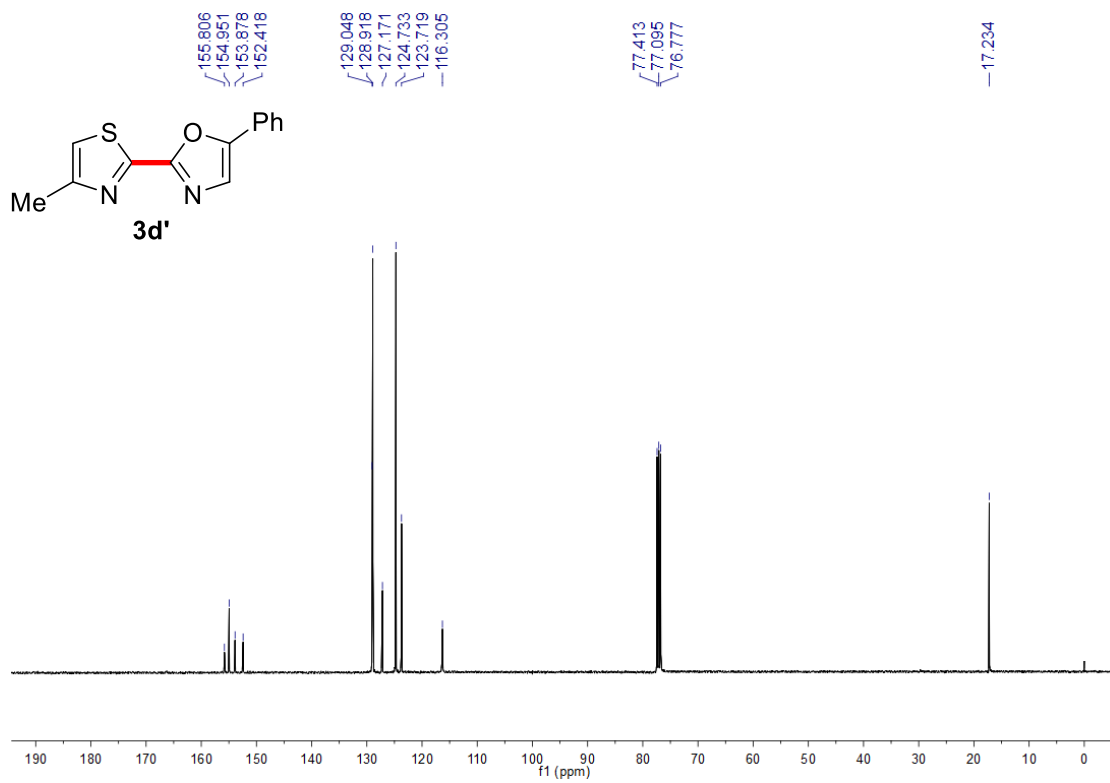

Supplement: c9gc02464f1.pdf [file c9gc02464f1.pdf]
